# Supplementary material
Source: publisher figshare collection journal article supplement (https://acs.figshare.com/ndownloader/files/5694600)
Supplement: Supplementary file 1 [file 5694600]

# ic0205132.cif

# SUBMISSION DETAILS

_publ_contact_author_name             'Dr. Duan Chun-ying'
_publ_contact_author_address
;
Coordination Chemistry Institute
The State Key Laboratory of Coordinaiton Chemistry
Nanjing University , Nanjing 210093
P. R. China
;
_publ_contact_author_email           duancy@nju.edu.cn
_publ_contact_author_fax             00 86 25 331 4502
_publ_contact_author_phone           00 86 25 359 7006

_publ_contact_letter
;
  Fellowed please find the CIF files of the  crystal structure
about our manuscript.


    Dr. Duan Chun-ying

    Professor
    Coordination Chemistry Institute
    Nanjing University,
    Nanjing 210093
    P. R. China
    Duancy@nju.edu.cn

;
 
_publ_requested_journal              'Inorganic Chemistry'
_publ_requested_category             ?

#==============================================================================

# TITLE AND AUTHOR LIST

_publ_section_title
;
Redox-Active Heterodimetallic Compounds Assembled from 
Ferrocenedicarboxylato(-2)
and Ferrocenecarboxylato(-1) as Ligands
;

loop_
_publ_author_name
_publ_author_address
 

'Guo Dong'
;
Coordination Chemistry Institute and State Key Laboratory of
Coordination Chemistry, Nanjing University,Nanjing,210093,
People's Republic of China
;

'Li Yu-ting'
;
Coordination Chemistry Institute and State Key Laboratory of
Coordination Chemistry, Nanjing University,Nanjing,210093,
People's Republic of China
;

'Duan Chun-ying'
;
Coordination Chemistry Institute and State Key Laboratory of
Coordination Chemistry, Nanjing University,Nanjing,210093,
People's Republic of China
;

'Mo Hong'
;
Coordination Chemistry Institute and State Key Laboratory of
Coordination Chemistry, Nanjing University,Nanjing,210093,
People's Republic of China
;

'Meng Qing-jin'
;
Coordination Chemistry Institute and State Key Laboratory of
Coordination Chemistry, Nanjing University,Nanjing,210093,
People's Republic of China
;

#=====================================================================

data_compound_1
 
_audit_creation_method            SHELXL-97
_chemical_name_systematic
;
  ?
;
_chemical_name_common             ?
_chemical_melting_point           ?
_chemical_formula_moiety          ?
_chemical_formula_sum
  'C40 H44 Cu2 Fe2 N4 O12'
_chemical_formula_weight          1011.57
 
loop_
  _atom_type_symbol
  _atom_type_description
  _atom_type_scat_dispersion_real
  _atom_type_scat_dispersion_imag
  _atom_type_scat_source
  'C'  'C'   0.0033   0.0016
  'International Tables Vol C Tables 4.2.6.8 and 6.1.1.4'
  'H'  'H'   0.0000   0.0000
  'International Tables Vol C Tables 4.2.6.8 and 6.1.1.4'
  'O'  'O'   0.0106   0.0060
  'International Tables Vol C Tables 4.2.6.8 and 6.1.1.4'
  'Fe'  'Fe'   0.3463   0.8444
  'International Tables Vol C Tables 4.2.6.8 and 6.1.1.4'
  'Cu'  'Cu'   0.3201   1.2651
  'International Tables Vol C Tables 4.2.6.8 and 6.1.1.4'
  'N'  'N'   0.0061   0.0033
  'International Tables Vol C Tables 4.2.6.8 and 6.1.1.4'
 
_symmetry_cell_setting           'Monoclinic'
_symmetry_space_group_name_H-M   'P2(1)/c  '
 
loop_
  _symmetry_equiv_pos_as_xyz
  'x, y, z'
  '-x, y+1/2, -z+1/2'
  '-x, -y, -z'
  'x, -y-1/2, z-1/2'
 
_cell_length_a                    11.480(2)
_cell_length_b                    18.910(4)
_cell_length_c                    9.6536(19)
_cell_angle_alpha                 90.00
_cell_angle_beta                  108.47(3)
_cell_angle_gamma                 90.00
_cell_volume                      1987.7(7)
_cell_formula_units_Z             2
_cell_measurement_temperature     293(2)
_cell_measurement_reflns_used     2310
_cell_measurement_theta_min       2.45
_cell_measurement_theta_max       24.38
 
_exptl_crystal_description        block
_exptl_crystal_colour             green
_exptl_crystal_size_max           0.30
_exptl_crystal_size_mid           0.20
_exptl_crystal_size_min           0.20
_exptl_crystal_density_meas       ?
_exptl_crystal_density_diffrn     1.690
_exptl_crystal_density_method     'not measured'
_exptl_crystal_F_000              1036
_exptl_absorpt_coefficient_mu     1.841
_exptl_absorpt_correction_type    empirical
_exptl_absorpt_correction_T_min   0.5823
_exptl_absorpt_correction_T_max   0.8521
_exptl_absorpt_process_details    '(Blessing, 1995, 1997)'
 
_exptl_special_details
;
  ?
;
 
_diffrn_ambient_temperature       293(2)
_diffrn_radiation_wavelength      0.71073
_diffrn_radiation_type            MoK\a
_diffrn_radiation_source          'fine-focus sealed tube'
_diffrn_radiation_monochromator   graphite
_diffrn_measurement_device_type   'NONIUS KappaCCD'
_diffrn_measurement_method        'CCD'
_diffrn_reflns_number             27719
_diffrn_reflns_av_R_equivalents   0.1802
_diffrn_reflns_av_sigmaI/netI     0.1021
_diffrn_reflns_limit_h_min        -13
_diffrn_reflns_limit_h_max        13
_diffrn_reflns_limit_k_min        -22
_diffrn_reflns_limit_k_max        22
_diffrn_reflns_limit_l_min        -11
_diffrn_reflns_limit_l_max        11
_diffrn_reflns_theta_min          3.50
_diffrn_reflns_theta_max          25.00
_reflns_number_total              3486
_reflns_number_gt                 2152
_reflns_threshold_expression      >2sigma(I)
 
_computing_data_collection        'KappaCCD (Nonius B. V., 1998)'
_computing_cell_refinement        'HKL Scalepack (Otwinowski & Minor, 1997)'
_computing_data_reduction
'HKL Denzo (Otwinowski & Minor, 1997) & maXus (Mackay et al., 1998)'
_computing_structure_solution     'SHELXS-97 (Sheldrick, 1997)'
_computing_structure_refinement   'SHELXL-97 (Sheldrick, 1997)'
_computing_molecular_graphics     'Bruker SHELXTL V5.1 (Sheldrick, 1998)'
_computing_publication_material   'SHELXL-97 (Sheldrick, 1997)'

_publ_section_references
;
collect:
"Collect" data collection software, Nonius B.V., Delft, The Netherlands, 1998.

HKL Scalepack & HKL Denzo:
Z. Otwinowski and W. Minor, " Processing of X-ray Diffraction Data Collected
in Oscillation Mode ", Methods in Enzymology, Volume 276: Macromolecular
Crystallography, part A, p.307-326, 1997,C.W. Carter, Jr. & R.M. Sweet,
Eds., Academic Press.

absorption correction:
R.H. Blessing (1995) Acta Cryst. A51, 33-37.
R.H. Blessing (1997) J.Appl. Cryst. 30, 421-426.

maXus:
S.Mackay, C.J.Gilmore, C.Edwards, M. Tremayne, N. Stuart, K.Shankland
"maXus: a computer program for the solution and refinement of crystal
structures from diffraction data", University of Glasgow, Scotland, UK,
Nonius BV, Delft, The Netherlands and MacScience Co. Ltd., Yokohama,
Japan (1998).

Sheldrick, G. M. (1998). SHELXTL Version 5.1. Bruker Analytical X-ray
Instruments Inc., Madison, Wisconsin, USA.

Sheldrick, G. M. (1997). SHELX-97. PC Version. University of Goettingen,
Germany.
;

 
_refine_special_details
;
  Refinement of F^2^ against ALL reflections.  The weighted R-factor wR and
  goodness of fit S are based on F^2^, conventional R-factors R are based
  on F, with F set to zero for negative F^2^. The threshold expression of
  F^2^ > 2sigma(F^2^) is used only for calculating R-factors(gt) etc. and is
  not relevant to the choice of reflections for refinement.  R-factors based
  on F^2^ are statistically about twice as large as those based on F, and R-
  factors based on ALL data will be even larger.
;
 
_refine_ls_structure_factor_coef  Fsqd
_refine_ls_matrix_type            full
_refine_ls_weighting_scheme       calc
_refine_ls_weighting_details
  'calc w=1/[\s^2^(Fo^2^)+(0.0300P)^2^+0.0000P] where P=(Fo^2^+2Fc^2^)/3'
_atom_sites_solution_primary      direct
_atom_sites_solution_secondary    difmap
_atom_sites_solution_hydrogens    geom
_refine_ls_hydrogen_treatment     mixed
_refine_ls_extinction_method      none
_refine_ls_extinction_coef        ?
_refine_ls_number_reflns          3486
_refine_ls_number_parameters      271
_refine_ls_number_restraints      0
_refine_ls_R_factor_all           0.1087
_refine_ls_R_factor_gt            0.0497
_refine_ls_wR_factor_ref          0.0917
_refine_ls_wR_factor_gt           0.0815
_refine_ls_goodness_of_fit_ref    1.004
_refine_ls_restrained_S_all       1.004
_refine_ls_shift/su_max           0.001
_refine_ls_shift/su_mean          0.000
 
loop_
  _atom_site_label
  _atom_site_type_symbol
  _atom_site_fract_x
  _atom_site_fract_y
  _atom_site_fract_z
  _atom_site_U_iso_or_equiv
  _atom_site_adp_type
  _atom_site_occupancy
  _atom_site_symmetry_multiplicity
  _atom_site_calc_flag
  _atom_site_refinement_flags
  _atom_site_disorder_assembly
  _atom_site_disorder_group
Cu1 Cu 0.71358(5) 0.03556(3) 0.57154(6) 0.03329(18) Uani 1 1 d . . .
Fe1 Fe 0.43657(6) 0.16263(3) 0.90052(7) 0.0313(2) Uani 1 1 d . . .
O1W O 0.5625(3) 0.07561(16) 0.4302(3) 0.0389(8) Uani 1 1 d . . .
H1WA H 0.5166 0.0834 0.4536 0.047 Uiso 1 1 d R . .
H1WB H 0.5195 0.0411 0.3461 0.047 Uiso 1 1 d R . .
O1 O 0.6819(3) 0.09220(16) 0.7244(3) 0.0389(8) Uani 1 1 d . . .
O2 O 0.5789(3) 0.00559(18) 0.7928(3) 0.0418(9) Uani 1 1 d . . .
O3 O 0.3640(3) 0.10533(17) 0.5066(3) 0.0436(9) Uani 1 1 d . . .
O5 O 0.8445(3) 0.11962(18) 0.5331(4) 0.0456(9) Uani 1 1 d . . .
O4 O 0.2700(3) 0.02092(17) 0.5923(3) 0.0390(8) Uani 1 1 d . . .
N1 N 0.8608(3) -0.0144(2) 0.7123(4) 0.0354(10) Uani 1 1 d . . .
N2 N 0.9111(4) 0.2013(2) 0.4054(4) 0.0422(11) Uani 1 1 d . . .
C1 C 0.6201(4) 0.0672(3) 0.8009(5) 0.0319(11) Uani 1 1 d . . .
C2 C 0.5996(4) 0.1164(2) 0.9122(5) 0.0309(11) Uani 1 1 d . . .
C3 C 0.5636(4) 0.0973(3) 1.0360(5) 0.0362(12) Uani 1 1 d . . .
H3A H 0.5491 0.0492 1.0651 0.043 Uiso 1 1 calc R . .
C4 C 0.5516(4) 0.1608(3) 1.1081(5) 0.0388(12) Uani 1 1 d . . .
H4A H 0.5261 0.1638 1.1957 0.047 Uiso 1 1 calc R . .
C5 C 0.5793(4) 0.2192(3) 1.0333(5) 0.0396(13) Uani 1 1 d . . .
H5A H 0.5785 0.2692 1.0599 0.047 Uiso 1 1 calc R . .
C6 C 0.6107(4) 0.1910(3) 0.9125(5) 0.0364(12) Uani 1 1 d . . .
H6A H 0.6333 0.2189 0.8394 0.044 Uiso 1 1 calc R . .
C7 C 0.3157(4) 0.0825(3) 0.5974(5) 0.0341(12) Uani 1 1 d . . .
C8 C 0.3043(4) 0.1307(3) 0.7127(5) 0.0339(12) Uani 1 1 d . . .
C9 C 0.2694(4) 0.1132(3) 0.8376(5) 0.0424(13) Uani 1 1 d . . .
H9A H 0.2524 0.0656 0.8664 0.051 Uiso 1 1 calc R . .
C10 C 0.2638(4) 0.1759(3) 0.9117(6) 0.0485(15) Uani 1 1 d . . .
H10A H 0.2425 0.1793 1.0021 0.058 Uiso 1 1 calc R . .
C11 C 0.2969(4) 0.2336(3) 0.8378(5) 0.0472(14) Uani 1 1 d . . .
H11A H 0.3004 0.2835 0.8661 0.057 Uiso 1 1 calc R . .
C12 C 0.3216(4) 0.2057(3) 0.7148(5) 0.0408(13) Uani 1 1 d . . .
H12A H 0.3467 0.2331 0.6428 0.049 Uiso 1 1 calc R . .
C13 C 0.8527(5) -0.0523(3) 0.8237(6) 0.0482(14) Uani 1 1 d . . .
H13A H 0.7769 -0.0556 0.8389 0.058 Uiso 1 1 calc R . .
C14 C 0.9510(5) -0.0870(3) 0.9183(6) 0.0579(16) Uani 1 1 d . . .
H14A H 0.9413 -0.1130 0.9958 0.069 Uiso 1 1 calc R . .
C15 C 1.0635(5) -0.0830(3) 0.8976(6) 0.0565(15) Uani 1 1 d . . .
H15A H 1.1317 -0.1053 0.9614 0.068 Uiso 1 1 calc R . .
C16 C 1.0729(5) -0.0459(3) 0.7822(6) 0.0493(14) Uani 1 1 d . . .
H16A H 1.1473 -0.0439 0.7631 0.059 Uiso 1 1 calc R . .
C17 C 0.9722(5) -0.0112(3) 0.6937(5) 0.0442(14) Uani 1 1 d . . .
H17A H 0.9810 0.0158 0.6171 0.053 Uiso 1 1 calc R . .
C18 C 0.8260(4) 0.1614(3) 0.4330(6) 0.0423(13) Uani 1 1 d . . .
H18A H 0.7459 0.1659 0.3707 0.051 Uiso 1 1 calc R . .
C19 C 1.0377(5) 0.1935(3) 0.4932(6) 0.0655(18) Uani 1 1 d . . .
H19A H 1.0439 0.1591 0.5683 0.098 Uiso 1 1 calc R . .
H19B H 1.0686 0.2381 0.5372 0.098 Uiso 1 1 calc R . .
H19C H 1.0851 0.1782 0.4327 0.098 Uiso 1 1 calc R . .
C20 C 0.8836(5) 0.2511(3) 0.2842(6) 0.0667(17) Uani 1 1 d . . .
H20A H 0.7968 0.2512 0.2339 0.100 Uiso 1 1 calc R . .
H20B H 0.9266 0.2373 0.2180 0.100 Uiso 1 1 calc R . .
H20C H 0.9092 0.2977 0.3210 0.100 Uiso 1 1 calc R . .
 
loop_
  _atom_site_aniso_label
  _atom_site_aniso_U_11
  _atom_site_aniso_U_22
  _atom_site_aniso_U_33
  _atom_site_aniso_U_23
  _atom_site_aniso_U_13
  _atom_site_aniso_U_12
Cu1 0.0364(4) 0.0358(4) 0.0303(3) -0.0035(3) 0.0142(3) -0.0029(3)
Fe1 0.0322(4) 0.0342(4) 0.0281(4) -0.0040(3) 0.0105(3) -0.0020(3)
O1W 0.037(2) 0.046(2) 0.0353(19) -0.0037(16) 0.0126(17) 0.0052(16)
O1 0.044(2) 0.047(2) 0.0317(18) -0.0072(16) 0.0194(18) -0.0019(17)
O2 0.043(2) 0.040(2) 0.044(2) -0.0110(18) 0.0155(18) -0.0055(19)
O3 0.046(2) 0.052(2) 0.040(2) -0.0014(17) 0.0232(19) -0.0016(18)
O5 0.045(2) 0.044(2) 0.050(2) 0.0041(19) 0.019(2) -0.0105(18)
O4 0.045(2) 0.037(2) 0.037(2) -0.0084(16) 0.0161(18) -0.0058(17)
N1 0.040(3) 0.036(3) 0.031(2) 0.0015(19) 0.014(2) 0.0009(19)
N2 0.035(3) 0.047(3) 0.042(3) 0.006(2) 0.008(2) -0.002(2)
C1 0.026(3) 0.042(3) 0.023(3) 0.000(2) 0.001(2) 0.006(2)
C2 0.028(3) 0.035(3) 0.025(3) -0.002(2) 0.001(2) -0.002(2)
C3 0.037(3) 0.040(3) 0.033(3) 0.003(2) 0.011(3) -0.001(2)
C4 0.044(3) 0.048(3) 0.022(2) -0.002(3) 0.006(2) -0.002(3)
C5 0.044(3) 0.034(3) 0.039(3) -0.010(3) 0.010(3) -0.008(3)
C6 0.033(3) 0.045(3) 0.031(3) 0.000(2) 0.010(3) -0.006(2)
C7 0.025(3) 0.041(3) 0.029(3) -0.006(2) -0.001(2) 0.009(2)
C8 0.027(3) 0.040(3) 0.032(3) -0.007(2) 0.006(2) 0.001(2)
C9 0.042(3) 0.042(3) 0.049(3) -0.016(3) 0.024(3) -0.010(3)
C10 0.037(3) 0.063(4) 0.052(3) -0.023(3) 0.024(3) -0.007(3)
C11 0.037(3) 0.045(4) 0.052(3) -0.024(3) 0.004(3) 0.008(3)
C12 0.038(3) 0.036(3) 0.043(3) 0.006(3) 0.004(3) 0.007(3)
C13 0.038(3) 0.056(4) 0.053(4) 0.003(3) 0.017(3) 0.001(3)
C14 0.049(4) 0.063(4) 0.062(4) 0.014(3) 0.016(3) 0.004(3)
C15 0.040(4) 0.053(4) 0.069(4) 0.004(3) 0.006(3) 0.004(3)
C16 0.032(3) 0.050(4) 0.066(4) -0.007(3) 0.016(3) 0.003(3)
C17 0.051(4) 0.048(3) 0.041(3) -0.005(3) 0.026(3) -0.003(3)
C18 0.029(3) 0.045(3) 0.055(4) -0.003(3) 0.015(3) 0.001(3)
C19 0.036(4) 0.082(5) 0.072(4) 0.019(4) 0.007(3) -0.010(3)
C20 0.060(4) 0.074(4) 0.063(4) 0.022(3) 0.015(4) -0.006(3)
 
_geom_special_details
;
  All esds (except the esd in the dihedral angle between two l.s. planes)
  are estimated using the full covariance matrix.  The cell esds are taken
  into account individually in the estimation of esds in distances, angles
  and torsion angles; correlations between esds in cell parameters are only
  used when they are defined by crystal symmetry.  An approximate (isotropic)
  treatment of cell esds is used for estimating esds involving l.s. planes.
;
 
loop_
  _geom_bond_atom_site_label_1
  _geom_bond_atom_site_label_2
  _geom_bond_distance
  _geom_bond_site_symmetry_2
  _geom_bond_publ_flag
Cu1 O1 1.949(3) . ?
Cu1 O4 1.966(3) 3_656 ?
Cu1 O1W 1.986(3) . ?
Cu1 N1 2.035(4) . ?
Cu1 O5 2.297(3) . ?
Fe1 C4 2.021(5) . ?
Fe1 C11 2.031(5) . ?
Fe1 C12 2.030(5) . ?
Fe1 C5 2.035(5) . ?
Fe1 C2 2.036(4) . ?
Fe1 C10 2.036(5) . ?
Fe1 C6 2.037(4) . ?
Fe1 C3 2.039(5) . ?
Fe1 C9 2.046(5) . ?
Fe1 C8 2.053(5) . ?
O1 C1 1.267(5) . ?
O2 C1 1.250(5) . ?
O3 C7 1.253(5) . ?
O5 C18 1.214(5) . ?
O4 C7 1.272(5) . ?
O4 Cu1 1.966(3) 3_656 ?
N1 C13 1.319(6) . ?
N1 C17 1.349(6) . ?
N2 C18 1.326(6) . ?
N2 C19 1.439(6) . ?
N2 C20 1.457(6) . ?
C1 C2 1.495(6) . ?
C2 C6 1.417(6) . ?
C2 C3 1.429(6) . ?
C3 C4 1.417(6) . ?
C4 C5 1.409(6) . ?
C5 C6 1.429(6) . ?
C7 C8 1.475(6) . ?
C8 C9 1.424(6) . ?
C8 C12 1.433(6) . ?
C9 C10 1.397(6) . ?
C10 C11 1.420(7) . ?
C11 C12 1.408(6) . ?
C13 C14 1.373(7) . ?
C14 C15 1.371(6) . ?
C15 C16 1.349(7) . ?
C16 C17 1.368(7) . ?
 
loop_
  _geom_angle_atom_site_label_1
  _geom_angle_atom_site_label_2
  _geom_angle_atom_site_label_3
  _geom_angle
  _geom_angle_site_symmetry_1
  _geom_angle_site_symmetry_3
  _geom_angle_publ_flag
O1 Cu1 O4 174.95(14) . 3_656 ?
O1 Cu1 O1W 88.79(13) . . ?
O4 Cu1 O1W 86.56(13) 3_656 . ?
O1 Cu1 N1 93.66(14) . . ?
O4 Cu1 N1 90.81(14) 3_656 . ?
O1W Cu1 N1 174.69(14) . . ?
O1 Cu1 O5 91.75(12) . . ?
O4 Cu1 O5 90.67(12) 3_656 . ?
O1W Cu1 O5 95.66(13) . . ?
N1 Cu1 O5 88.98(14) . . ?
C4 Fe1 C11 120.87(19) . . ?
C4 Fe1 C12 157.0(2) . . ?
C11 Fe1 C12 40.58(17) . . ?
C4 Fe1 C5 40.67(17) . . ?
C11 Fe1 C5 104.0(2) . . ?
C12 Fe1 C5 120.9(2) . . ?
C4 Fe1 C2 68.73(18) . . ?
C11 Fe1 C2 157.7(2) . . ?
C12 Fe1 C2 123.38(18) . . ?
C5 Fe1 C2 69.42(19) . . ?
C4 Fe1 C10 106.9(2) . . ?
C11 Fe1 C10 40.88(19) . . ?
C12 Fe1 C10 68.0(2) . . ?
C5 Fe1 C10 120.35(19) . . ?
C2 Fe1 C10 160.7(2) . . ?
C4 Fe1 C6 68.11(18) . . ?
C11 Fe1 C6 120.7(2) . . ?
C12 Fe1 C6 107.21(19) . . ?
C5 Fe1 C6 41.08(17) . . ?
C2 Fe1 C6 40.71(17) . . ?
C10 Fe1 C6 156.9(2) . . ?
C4 Fe1 C3 40.84(18) . . ?
C11 Fe1 C3 158.21(18) . . ?
C12 Fe1 C3 160.52(18) . . ?
C5 Fe1 C3 69.20(19) . . ?
C2 Fe1 C3 41.07(16) . . ?
C10 Fe1 C3 123.4(2) . . ?
C6 Fe1 C3 68.52(19) . . ?
C4 Fe1 C9 122.9(2) . . ?
C11 Fe1 C9 68.6(2) . . ?
C12 Fe1 C9 68.6(2) . . ?
C5 Fe1 C9 156.84(17) . . ?
C2 Fe1 C9 125.39(19) . . ?
C10 Fe1 C9 40.03(17) . . ?
C6 Fe1 C9 161.46(18) . . ?
C3 Fe1 C9 109.1(2) . . ?
C4 Fe1 C8 159.9(2) . . ?
C11 Fe1 C8 68.78(19) . . ?
C12 Fe1 C8 41.08(18) . . ?
C5 Fe1 C8 159.03(19) . . ?
C2 Fe1 C8 109.39(17) . . ?
C10 Fe1 C8 67.85(18) . . ?
C6 Fe1 C8 124.43(17) . . ?
C3 Fe1 C8 124.5(2) . . ?
C9 Fe1 C8 40.67(17) . . ?
C1 O1 Cu1 120.6(3) . . ?
C18 O5 Cu1 128.4(3) . . ?
C7 O4 Cu1 112.7(3) . 3_656 ?
C13 N1 C17 116.6(4) . . ?
C13 N1 Cu1 122.6(3) . . ?
C17 N1 Cu1 120.8(3) . . ?
C18 N2 C19 119.6(4) . . ?
C18 N2 C20 122.9(5) . . ?
C19 N2 C20 117.4(4) . . ?
O2 C1 O1 125.6(4) . . ?
O2 C1 C2 118.8(4) . . ?
O1 C1 C2 115.5(4) . . ?
C6 C2 C3 107.5(4) . . ?
C6 C2 C1 125.9(4) . . ?
C3 C2 C1 126.6(4) . . ?
C6 C2 Fe1 69.7(3) . . ?
C3 C2 Fe1 69.6(2) . . ?
C1 C2 Fe1 125.4(3) . . ?
C4 C3 C2 107.2(4) . . ?
C4 C3 Fe1 68.9(3) . . ?
C2 C3 Fe1 69.4(3) . . ?
C5 C4 C3 109.9(4) . . ?
C5 C4 Fe1 70.2(3) . . ?
C3 C4 Fe1 70.2(3) . . ?
C4 C5 C6 106.4(4) . . ?
C4 C5 Fe1 69.1(3) . . ?
C6 C5 Fe1 69.5(3) . . ?
C2 C6 C5 109.1(4) . . ?
C2 C6 Fe1 69.6(3) . . ?
C5 C6 Fe1 69.4(3) . . ?
O3 C7 O4 123.8(4) . . ?
O3 C7 C8 118.7(5) . . ?
O4 C7 C8 117.5(4) . . ?
C9 C8 C12 107.0(4) . . ?
C9 C8 C7 127.7(4) . . ?
C12 C8 C7 125.3(4) . . ?
C9 C8 Fe1 69.4(3) . . ?
C12 C8 Fe1 68.6(3) . . ?
C7 C8 Fe1 129.1(3) . . ?
C10 C9 C8 108.0(4) . . ?
C10 C9 Fe1 69.6(3) . . ?
C8 C9 Fe1 69.9(3) . . ?
C9 C10 C11 109.3(4) . . ?
C9 C10 Fe1 70.4(3) . . ?
C11 C10 Fe1 69.4(3) . . ?
C12 C11 C10 107.1(4) . . ?
C12 C11 Fe1 69.7(3) . . ?
C10 C11 Fe1 69.7(3) . . ?
C11 C12 C8 108.6(4) . . ?
C11 C12 Fe1 69.7(3) . . ?
C8 C12 Fe1 70.3(3) . . ?
N1 C13 C14 123.2(5) . . ?
C15 C14 C13 119.3(5) . . ?
C16 C15 C14 118.4(5) . . ?
C15 C16 C17 119.5(5) . . ?
N1 C17 C16 123.0(5) . . ?
O5 C18 N2 125.2(5) . . ?
 
_diffrn_measured_fraction_theta_max    0.994
_diffrn_reflns_theta_full              25.00
_diffrn_measured_fraction_theta_full   0.994
_refine_diff_density_max    0.367
_refine_diff_density_min   -0.574
_refine_diff_density_rms    0.093

#===END

data_Compound_2
 
_audit_creation_method            SHELXL-97
_chemical_name_systematic
;
  ?
;
_chemical_name_common             ?
_chemical_melting_point           ?
_chemical_formula_moiety          ?
_chemical_formula_sum
  'C44 H38 Fe2 N4 Ni2 O9'
_chemical_formula_weight          995.90
 
loop_
  _atom_type_symbol
  _atom_type_description
  _atom_type_scat_dispersion_real
  _atom_type_scat_dispersion_imag
  _atom_type_scat_source
  'C'  'C'   0.0033   0.0016
  'International Tables Vol C Tables 4.2.6.8 and 6.1.1.4'
  'H'  'H'   0.0000   0.0000
  'International Tables Vol C Tables 4.2.6.8 and 6.1.1.4'
  'O'  'O'   0.0106   0.0060
  'International Tables Vol C Tables 4.2.6.8 and 6.1.1.4'
  'Fe'  'Fe'   0.3463   0.8444
  'International Tables Vol C Tables 4.2.6.8 and 6.1.1.4'
  'Ni'  'Ni'   0.3393   1.1124
  'International Tables Vol C Tables 4.2.6.8 and 6.1.1.4'
  'N'  'N'   0.0061   0.0033
  'International Tables Vol C Tables 4.2.6.8 and 6.1.1.4'
 
_symmetry_cell_setting           'Orthorhombic'
_symmetry_space_group_name_H-M   'Pbcn '
 
loop_
  _symmetry_equiv_pos_as_xyz
  'x, y, z'
  '-x+1/2, -y+1/2, z+1/2'
  '-x, y, -z+1/2'
  'x+1/2, -y+1/2, -z'
  '-x, -y, -z'
  'x-1/2, y-1/2, -z-1/2'
  'x, -y, z-1/2'
  '-x-1/2, y-1/2, z'
 
_cell_length_a                    19.047(4)
_cell_length_b                    15.460(3)
_cell_length_c                    13.989(3)
_cell_angle_alpha                 90.00
_cell_angle_beta                  90.00
_cell_angle_gamma                 90.00
_cell_volume                      4119.3(14)
_cell_formula_units_Z             4
_cell_measurement_temperature     293(2)
_cell_measurement_reflns_used     ?
_cell_measurement_theta_min       ?
_cell_measurement_theta_max       ?
 
_exptl_crystal_description        block
_exptl_crystal_colour             pale-green
_exptl_crystal_size_max           0.40
_exptl_crystal_size_mid           0.30
_exptl_crystal_size_min           0.30
_exptl_crystal_density_meas       ?
_exptl_crystal_density_diffrn     1.606
_exptl_crystal_density_method     'not measured'
_exptl_crystal_F_000              2040
_exptl_absorpt_coefficient_mu     1.653
_exptl_absorpt_correction_type    empirical
_exptl_absorpt_correction_T_min   0.5323
_exptl_absorpt_correction_T_max   0.6221
_exptl_absorpt_process_details    '(Blessing, 1995, 1997)'
_exptl_special_details
;
  ?
;
 
_diffrn_ambient_temperature       293(2)
_diffrn_radiation_wavelength      0.71073
_diffrn_radiation_type            MoK\a
_diffrn_radiation_source          'fine-focus sealed tube'
_diffrn_radiation_monochromator   graphite
_diffrn_measurement_device_type   'NONIUS KappaCCD'
_diffrn_measurement_method        'CCD'
_diffrn_reflns_number             53832
_diffrn_reflns_av_R_equivalents   0.1445
_diffrn_reflns_av_sigmaI/netI     0.0716
_diffrn_reflns_limit_h_min        -22
_diffrn_reflns_limit_h_max        22
_diffrn_reflns_limit_k_min        -17
_diffrn_reflns_limit_k_max        17
_diffrn_reflns_limit_l_min        -16
_diffrn_reflns_limit_l_max        16
_diffrn_reflns_theta_min          3.39
_diffrn_reflns_theta_max          25.00
_reflns_number_total              3544
_reflns_number_gt                 2224
_reflns_threshold_expression      >2sigma(I)
 
_computing_data_collection        'KappaCCD (Nonius B. V., 1998)'
_computing_cell_refinement        'HKL Scalepack (Otwinowski & Minor, 1997)'
_computing_data_reduction
'HKL Denzo (Otwinowski & Minor, 1997) & maXus (Mackay et al., 1998)'
_computing_structure_solution     'SHELXS-97 (Sheldrick, 1997)'
_computing_structure_refinement   'SHELXL-97 (Sheldrick, 1997)'
_computing_molecular_graphics     'Bruker SHELXTL V5.1 (Sheldrick, 1998)'
_computing_publication_material   'SHELXL-97 (Sheldrick, 1997)'

_publ_section_references
;
collect:
"Collect" data collection software, Nonius B.V., Delft, The Netherlands, 1998.

HKL Scalepack & HKL Denzo:
Z. Otwinowski and W. Minor, " Processing of X-ray Diffraction Data Collected
in Oscillation Mode ", Methods in Enzymology, Volume 276: Macromolecular
Crystallography, part A, p.307-326, 1997,C.W. Carter, Jr. & R.M. Sweet,
Eds., Academic Press.

absorption correction:
R.H. Blessing (1995) Acta Cryst. A51, 33-37.
R.H. Blessing (1997) J.Appl. Cryst. 30, 421-426.

maXus:
S.Mackay, C.J.Gilmore, C.Edwards, M. Tremayne, N. Stuart, K.Shankland
"maXus: a computer program for the solution and refinement of crystal
structures from diffraction data", University of Glasgow, Scotland, UK,
Nonius BV, Delft, The Netherlands and MacScience Co. Ltd., Yokohama,
Japan (1998).

Sheldrick, G. M. (1998). SHELXTL Version 5.1. Bruker Analytical X-ray
Instruments Inc., Madison, Wisconsin, USA.

Sheldrick, G. M. (1997). SHELX-97. PC Version. University of Goettingen,
Germany.
;
 
 
_refine_special_details
;
  Refinement of F^2^ against ALL reflections.  The weighted R-factor wR and
  goodness of fit S are based on F^2^, conventional R-factors R are based
  on F, with F set to zero for negative F^2^. The threshold expression of
  F^2^ > 2sigma(F^2^) is used only for calculating R-factors(gt) etc. and is
  not relevant to the choice of reflections for refinement.  R-factors based
  on F^2^ are statistically about twice as large as those based on F, and R-
  factors based on ALL data will be even larger.
;
 
_refine_ls_structure_factor_coef  Fsqd
_refine_ls_matrix_type            full
_refine_ls_weighting_scheme       calc
_refine_ls_weighting_details
  'calc w=1/[\s^2^(Fo^2^)+(0.0400P)^2^+0.0000P] where P=(Fo^2^+2Fc^2^)/3'
_atom_sites_solution_primary      direct
_atom_sites_solution_secondary    difmap
_atom_sites_solution_hydrogens    geom
_refine_ls_hydrogen_treatment     mixed
_refine_ls_extinction_method      none
_refine_ls_extinction_coef        ?
_refine_ls_number_reflns          3544
_refine_ls_number_parameters      276
_refine_ls_number_restraints      0
_refine_ls_R_factor_all           0.1026
_refine_ls_R_factor_gt            0.0412
_refine_ls_wR_factor_ref          0.0870
_refine_ls_wR_factor_gt           0.0785
_refine_ls_goodness_of_fit_ref    1.035
_refine_ls_restrained_S_all       1.035
_refine_ls_shift/su_max           0.000
_refine_ls_shift/su_mean          0.000
 
loop_
  _atom_site_label
  _atom_site_type_symbol
  _atom_site_fract_x
  _atom_site_fract_y
  _atom_site_fract_z
  _atom_site_U_iso_or_equiv
  _atom_site_adp_type
  _atom_site_occupancy
  _atom_site_symmetry_multiplicity
  _atom_site_calc_flag
  _atom_site_refinement_flags
  _atom_site_disorder_assembly
  _atom_site_disorder_group
Ni1 Ni 0.47772(2) 0.24333(3) 0.37371(3) 0.03850(15) Uani 1 1 d . . .
Fe1 Fe 0.76293(3) 0.19590(4) 0.26233(4) 0.04901(19) Uani 1 1 d . . .
O1 O 0.57546(12) 0.19926(16) 0.35980(16) 0.0430(6) Uani 1 1 d . . .
O2 O 0.57488(12) 0.15069(15) 0.20791(17) 0.0416(6) Uani 1 1 d . . .
O3 O 0.62230(13) 0.29410(16) 0.11020(17) 0.0493(6) Uani 1 1 d . . .
O4 O 0.62768(13) 0.37868(16) 0.24055(18) 0.0486(6) Uani 1 1 d . . .
O1W O 0.5000 0.3208(2) 0.2500 0.0410(8) Uani 1 2 d S . .
H1WA H 0.4627 0.3507 0.2454 0.049 Uiso 1 1 d R . .
N1 N 0.51841(16) 0.33727(19) 0.4691(2) 0.0440(8) Uani 1 1 d . . .
N2 N 0.46339(16) 0.15902(19) 0.4878(2) 0.0451(8) Uani 1 1 d . . .
C1 C 0.60279(18) 0.1625(2) 0.2880(3) 0.0374(9) Uani 1 1 d . . .
C2 C 0.67523(19) 0.1296(2) 0.3046(3) 0.0427(9) Uani 1 1 d . . .
C3 C 0.7168(2) 0.0778(2) 0.2421(3) 0.0534(10) Uani 1 1 d . . .
H3A H 0.7017 0.0534 0.1808 0.064 Uiso 1 1 calc R . .
C4 C 0.7836(2) 0.0667(3) 0.2859(4) 0.0678(13) Uani 1 1 d . . .
H4A H 0.8231 0.0340 0.2593 0.081 Uiso 1 1 calc R . .
C5 C 0.7838(2) 0.1115(3) 0.3728(4) 0.0679(13) Uani 1 1 d . . .
H5A H 0.8235 0.1156 0.4170 0.081 Uiso 1 1 calc R . .
C6 C 0.7176(2) 0.1509(3) 0.3856(3) 0.0544(10) Uani 1 1 d . . .
H6A H 0.7032 0.1860 0.4405 0.065 Uiso 1 1 calc R . .
C7 C 0.6548(2) 0.3284(2) 0.1802(3) 0.0470(10) Uani 1 1 d . . .
C8 C 0.7304(2) 0.3056(2) 0.1922(3) 0.0466(9) Uani 1 1 d . . .
C9 C 0.7715(2) 0.2520(3) 0.1312(3) 0.0551(10) Uani 1 1 d . . .
H9A H 0.7560 0.2267 0.0705 0.066 Uiso 1 1 calc R . .
C10 C 0.8387(2) 0.2427(3) 0.1727(3) 0.0651(12) Uani 1 1 d . . .
H10A H 0.8778 0.2094 0.1459 0.078 Uiso 1 1 calc R . .
C11 C 0.8396(2) 0.2890(3) 0.2595(3) 0.0646(12) Uani 1 1 d . . .
H11A H 0.8794 0.2941 0.3036 0.078 Uiso 1 1 calc R . .
C12 C 0.7727(2) 0.3270(2) 0.2708(3) 0.0533(10) Uani 1 1 d . . .
H12A H 0.7580 0.3626 0.3252 0.064 Uiso 1 1 calc R . .
C13 C 0.5808(2) 0.3743(3) 0.4604(3) 0.0538(11) Uani 1 1 d . . .
H13A H 0.6094 0.3574 0.4099 0.065 Uiso 1 1 calc R . .
C14 C 0.6053(3) 0.4366(3) 0.5222(3) 0.0734(14) Uani 1 1 d . . .
H14A H 0.6493 0.4613 0.5132 0.088 Uiso 1 1 calc R . .
C15 C 0.5638(3) 0.4616(3) 0.5971(4) 0.0813(16) Uani 1 1 d . . .
H15A H 0.5788 0.5044 0.6390 0.098 Uiso 1 1 calc R . .
C16 C 0.5012(3) 0.4235(3) 0.6092(3) 0.0782(15) Uani 1 1 d . . .
H16A H 0.4727 0.4384 0.6607 0.094 Uiso 1 1 calc R . .
C17 C 0.4793(2) 0.3610(3) 0.5432(3) 0.0628(12) Uani 1 1 d . . .
H17A H 0.4357 0.3350 0.5516 0.075 Uiso 1 1 calc R . .
C18 C 0.5178(2) 0.1381(3) 0.5443(3) 0.0567(11) Uani 1 1 d . . .
H18A H 0.5601 0.1671 0.5358 0.068 Uiso 1 1 calc R . .
C19 C 0.5139(3) 0.0760(3) 0.6138(3) 0.0659(12) Uani 1 1 d . . .
H19A H 0.5527 0.0642 0.6520 0.079 Uiso 1 1 calc R . .
C20 C 0.4533(3) 0.0320(3) 0.6266(3) 0.0745(14) Uani 1 1 d . . .
H20A H 0.4499 -0.0110 0.6729 0.089 Uiso 1 1 calc R . .
C21 C 0.3970(3) 0.0520(3) 0.5700(3) 0.0707(13) Uani 1 1 d . . .
H21A H 0.3547 0.0228 0.5775 0.085 Uiso 1 1 calc R . .
C22 C 0.4037(2) 0.1158(3) 0.5019(3) 0.0556(11) Uani 1 1 d . . .
H22A H 0.3650 0.1292 0.4643 0.067 Uiso 1 1 calc R . .
 
loop_
  _atom_site_aniso_label
  _atom_site_aniso_U_11
  _atom_site_aniso_U_22
  _atom_site_aniso_U_33
  _atom_site_aniso_U_23
  _atom_site_aniso_U_13
  _atom_site_aniso_U_12
Ni1 0.0434(3) 0.0386(3) 0.0335(2) -0.0012(2) -0.0003(2) 0.0019(2)
Fe1 0.0413(3) 0.0474(4) 0.0583(4) 0.0016(3) 0.0017(3) 0.0009(3)
O1 0.0432(14) 0.0501(16) 0.0355(14) 0.0001(13) 0.0007(12) 0.0049(12)
O2 0.0467(15) 0.0431(16) 0.0351(14) -0.0002(12) -0.0032(12) 0.0029(12)
O3 0.0476(15) 0.0556(17) 0.0448(15) 0.0036(13) -0.0041(13) -0.0090(13)
O4 0.0487(15) 0.0414(15) 0.0558(16) -0.0009(14) -0.0006(14) -0.0030(13)
O1W 0.0419(19) 0.040(2) 0.0412(19) 0.000 -0.0032(16) 0.000
N1 0.054(2) 0.0397(18) 0.0383(18) -0.0038(14) -0.0038(16) 0.0061(16)
N2 0.055(2) 0.0428(19) 0.0375(17) 0.0013(15) 0.0042(17) -0.0016(16)
C1 0.043(2) 0.029(2) 0.041(2) 0.0113(17) 0.0025(19) -0.0031(17)
C2 0.042(2) 0.037(2) 0.049(2) 0.0051(18) 0.0022(19) -0.0002(18)
C3 0.054(2) 0.037(2) 0.069(3) 0.003(2) 0.006(2) 0.0010(19)
C4 0.050(3) 0.056(3) 0.097(4) 0.016(3) 0.013(3) 0.015(2)
C5 0.042(3) 0.078(3) 0.083(3) 0.026(3) -0.011(2) 0.007(2)
C6 0.051(2) 0.063(3) 0.049(2) 0.008(2) -0.003(2) 0.000(2)
C7 0.049(3) 0.037(2) 0.054(3) 0.018(2) -0.001(2) -0.012(2)
C8 0.045(2) 0.038(2) 0.056(2) 0.004(2) 0.001(2) -0.0065(19)
C9 0.057(3) 0.053(3) 0.054(2) 0.003(2) 0.008(2) -0.008(2)
C10 0.047(3) 0.060(3) 0.088(3) 0.005(3) 0.018(2) -0.002(2)
C11 0.047(2) 0.056(3) 0.091(3) -0.005(3) -0.007(2) -0.014(2)
C12 0.044(2) 0.046(3) 0.070(3) -0.003(2) -0.005(2) -0.0023(19)
C13 0.070(3) 0.046(3) 0.046(2) 0.004(2) -0.007(2) -0.004(2)
C14 0.097(4) 0.053(3) 0.070(3) -0.006(3) -0.027(3) -0.007(3)
C15 0.117(5) 0.048(3) 0.080(4) -0.015(3) -0.049(4) 0.010(3)
C16 0.110(4) 0.072(3) 0.053(3) -0.024(3) -0.019(3) 0.032(3)
C17 0.069(3) 0.065(3) 0.054(3) -0.009(2) -0.010(2) 0.016(2)
C18 0.071(3) 0.057(3) 0.042(2) 0.005(2) -0.003(2) -0.005(2)
C19 0.094(4) 0.056(3) 0.048(2) 0.011(2) -0.006(3) 0.000(3)
C20 0.131(4) 0.048(3) 0.044(3) 0.011(2) 0.005(3) -0.008(3)
C21 0.095(4) 0.059(3) 0.058(3) 0.006(2) 0.017(3) -0.026(3)
C22 0.061(3) 0.058(3) 0.048(2) -0.004(2) 0.001(2) -0.004(2)
 
_geom_special_details
;
  All esds (except the esd in the dihedral angle between two l.s. planes)
  are estimated using the full covariance matrix.  The cell esds are taken
  into account individually in the estimation of esds in distances, angles
  and torsion angles; correlations between esds in cell parameters are only
  used when they are defined by crystal symmetry.  An approximate (isotropic)
  treatment of cell esds is used for estimating esds involving l.s. planes.
;
 
loop_
  _geom_bond_atom_site_label_1
  _geom_bond_atom_site_label_2
  _geom_bond_distance
  _geom_bond_site_symmetry_2
  _geom_bond_publ_flag
Ni1 O1 1.992(2) . ?
Ni1 O3 2.073(2) 3_655 ?
Ni1 N2 2.078(3) . ?
Ni1 O2 2.088(2) 3_655 ?
Ni1 N1 2.119(3) . ?
Ni1 O1W 2.1468(18) . ?
Fe1 C9 2.036(4) . ?
Fe1 C12 2.038(4) . ?
Fe1 C10 2.044(4) . ?
Fe1 C3 2.045(4) . ?
Fe1 C2 2.047(4) . ?
Fe1 C6 2.050(4) . ?
Fe1 C11 2.052(4) . ?
Fe1 C8 2.055(4) . ?
Fe1 C5 2.060(4) . ?
Fe1 C4 2.063(4) . ?
O1 C1 1.266(4) . ?
O2 C1 1.254(4) . ?
O2 Ni1 2.088(2) 3_655 ?
O3 C7 1.274(4) . ?
O3 Ni1 2.073(2) 3_655 ?
O4 C7 1.258(4) . ?
O1W Ni1 2.1468(18) 3_655 ?
N1 C13 1.324(4) . ?
N1 C17 1.328(5) . ?
N2 C22 1.334(4) . ?
N2 C18 1.343(5) . ?
C1 C2 1.488(5) . ?
C2 C3 1.426(5) . ?
C2 C6 1.429(5) . ?
C3 C4 1.424(6) . ?
C4 C5 1.399(6) . ?
C5 C6 1.410(5) . ?
C7 C8 1.491(5) . ?
C8 C12 1.402(5) . ?
C8 C9 1.424(5) . ?
C9 C10 1.412(6) . ?
C10 C11 1.410(6) . ?
C11 C12 1.413(5) . ?
C13 C14 1.376(5) . ?
C14 C15 1.368(6) . ?
C15 C16 1.341(6) . ?
C16 C17 1.400(6) . ?
C18 C19 1.368(5) . ?
C19 C20 1.353(6) . ?
C20 C21 1.367(6) . ?
C21 C22 1.376(5) . ?
 
loop_
  _geom_angle_atom_site_label_1
  _geom_angle_atom_site_label_2
  _geom_angle_atom_site_label_3
  _geom_angle
  _geom_angle_site_symmetry_1
  _geom_angle_site_symmetry_3
  _geom_angle_publ_flag
O1 Ni1 O3 177.63(10) . 3_655 ?
O1 Ni1 N2 89.04(11) . . ?
O3 Ni1 N2 91.91(11) 3_655 . ?
O1 Ni1 O2 99.24(9) . 3_655 ?
O3 Ni1 O2 82.99(9) 3_655 3_655 ?
N2 Ni1 O2 85.79(11) . 3_655 ?
O1 Ni1 N1 87.37(11) . . ?
O3 Ni1 N1 90.47(11) 3_655 . ?
N2 Ni1 N1 89.69(12) . . ?
O2 Ni1 N1 171.91(11) 3_655 . ?
O1 Ni1 O1W 85.83(7) . . ?
O3 Ni1 O1W 93.32(8) 3_655 . ?
N2 Ni1 O1W 174.08(10) . . ?
O2 Ni1 O1W 92.10(9) 3_655 . ?
N1 Ni1 O1W 93.03(10) . . ?
C9 Fe1 C12 67.74(16) . . ?
C9 Fe1 C10 40.50(16) . . ?
C12 Fe1 C10 67.63(17) . . ?
C9 Fe1 C3 106.86(17) . . ?
C12 Fe1 C3 159.10(15) . . ?
C10 Fe1 C3 122.29(17) . . ?
C9 Fe1 C2 122.61(15) . . ?
C12 Fe1 C2 123.72(15) . . ?
C10 Fe1 C2 158.50(17) . . ?
C3 Fe1 C2 40.78(14) . . ?
C9 Fe1 C6 159.44(16) . . ?
C12 Fe1 C6 109.11(17) . . ?
C10 Fe1 C6 158.99(17) . . ?
C3 Fe1 C6 68.43(16) . . ?
C2 Fe1 C6 40.84(14) . . ?
C9 Fe1 C11 68.06(17) . . ?
C12 Fe1 C11 40.41(16) . . ?
C10 Fe1 C11 40.28(17) . . ?
C3 Fe1 C11 158.36(17) . . ?
C2 Fe1 C11 159.72(17) . . ?
C6 Fe1 C11 123.68(18) . . ?
C9 Fe1 C8 40.75(14) . . ?
C12 Fe1 C8 40.05(14) . . ?
C10 Fe1 C8 68.16(16) . . ?
C3 Fe1 C8 122.73(16) . . ?
C2 Fe1 C8 107.74(15) . . ?
C6 Fe1 C8 123.68(16) . . ?
C11 Fe1 C8 68.06(16) . . ?
C9 Fe1 C5 158.43(18) . . ?
C12 Fe1 C5 124.64(19) . . ?
C10 Fe1 C5 123.25(17) . . ?
C3 Fe1 C5 67.77(18) . . ?
C2 Fe1 C5 67.90(15) . . ?
C6 Fe1 C5 40.13(15) . . ?
C11 Fe1 C5 108.77(18) . . ?
C8 Fe1 C5 159.78(18) . . ?
C9 Fe1 C4 122.80(18) . . ?
C12 Fe1 C4 159.40(17) . . ?
C10 Fe1 C4 107.83(18) . . ?
C3 Fe1 C4 40.55(16) . . ?
C2 Fe1 C4 67.98(16) . . ?
C6 Fe1 C4 67.48(17) . . ?
C11 Fe1 C4 123.14(17) . . ?
C8 Fe1 C4 158.97(18) . . ?
C5 Fe1 C4 39.66(17) . . ?
C1 O1 Ni1 128.0(2) . . ?
C1 O2 Ni1 126.4(2) . 3_655 ?
C7 O3 Ni1 121.4(2) . 3_655 ?
Ni1 O1W Ni1 112.19(14) 3_655 . ?
C13 N1 C17 117.1(3) . . ?
C13 N1 Ni1 124.5(3) . . ?
C17 N1 Ni1 118.4(3) . . ?
C22 N2 C18 116.7(3) . . ?
C22 N2 Ni1 122.7(3) . . ?
C18 N2 Ni1 120.1(3) . . ?
O2 C1 O1 126.9(3) . . ?
O2 C1 C2 118.9(3) . . ?
O1 C1 C2 114.2(3) . . ?
C3 C2 C6 107.6(3) . . ?
C3 C2 C1 127.6(3) . . ?
C6 C2 C1 124.7(3) . . ?
C3 C2 Fe1 69.6(2) . . ?
C6 C2 Fe1 69.7(2) . . ?
C1 C2 Fe1 122.8(2) . . ?
C4 C3 C2 107.5(4) . . ?
C4 C3 Fe1 70.4(2) . . ?
C2 C3 Fe1 69.7(2) . . ?
C5 C4 C3 108.4(4) . . ?
C5 C4 Fe1 70.0(2) . . ?
C3 C4 Fe1 69.0(2) . . ?
C4 C5 C6 108.8(4) . . ?
C4 C5 Fe1 70.3(3) . . ?
C6 C5 Fe1 69.6(2) . . ?
C5 C6 C2 107.7(4) . . ?
C5 C6 Fe1 70.3(2) . . ?
C2 C6 Fe1 69.4(2) . . ?
O4 C7 O3 125.0(4) . . ?
O4 C7 C8 117.8(4) . . ?
O3 C7 C8 117.2(4) . . ?
C12 C8 C9 106.9(3) . . ?
C12 C8 C7 126.0(4) . . ?
C9 C8 C7 126.9(4) . . ?
C12 C8 Fe1 69.3(2) . . ?
C9 C8 Fe1 68.9(2) . . ?
C7 C8 Fe1 122.7(2) . . ?
C10 C9 C8 108.1(4) . . ?
C10 C9 Fe1 70.1(2) . . ?
C8 C9 Fe1 70.4(2) . . ?
C11 C10 C9 108.3(4) . . ?
C11 C10 Fe1 70.2(2) . . ?
C9 C10 Fe1 69.4(2) . . ?
C10 C11 C12 107.2(4) . . ?
C10 C11 Fe1 69.6(2) . . ?
C12 C11 Fe1 69.3(2) . . ?
C8 C12 C11 109.5(4) . . ?
C8 C12 Fe1 70.6(2) . . ?
C11 C12 Fe1 70.3(2) . . ?
N1 C13 C14 123.3(4) . . ?
C15 C14 C13 118.9(5) . . ?
C16 C15 C14 119.1(4) . . ?
C15 C16 C17 119.0(5) . . ?
N1 C17 C16 122.6(4) . . ?
N2 C18 C19 123.1(4) . . ?
C20 C19 C18 119.6(4) . . ?
C19 C20 C21 118.6(4) . . ?
C20 C21 C22 119.4(4) . . ?
N2 C22 C21 122.7(4) . . ?
 
_diffrn_measured_fraction_theta_max    0.975
_diffrn_reflns_theta_full              25.00
_diffrn_measured_fraction_theta_full   0.975
_refine_diff_density_max    0.355
_refine_diff_density_min   -0.351
_refine_diff_density_rms    0.065

#===END

data_compound_3
 
_audit_creation_method            SHELXL-97
_chemical_name_systematic
;
  ?
;
_chemical_name_common             ?
_chemical_melting_point           ?
_chemical_formula_moiety          ?
_chemical_formula_sum
  'C44 H38 Co2 Fe2 N4 O9'
_chemical_formula_weight          996.34
 
loop_
  _atom_type_symbol
  _atom_type_description
  _atom_type_scat_dispersion_real
  _atom_type_scat_dispersion_imag
  _atom_type_scat_source
  'C'  'C'   0.0033   0.0016
  'International Tables Vol C Tables 4.2.6.8 and 6.1.1.4'
  'H'  'H'   0.0000   0.0000
  'International Tables Vol C Tables 4.2.6.8 and 6.1.1.4'
  'N'  'N'   0.0061   0.0033
  'International Tables Vol C Tables 4.2.6.8 and 6.1.1.4'
  'Co'  'Co'   0.3494   0.9721
  'International Tables Vol C Tables 4.2.6.8 and 6.1.1.4'
  'Fe'  'Fe'   0.3463   0.8444
  'International Tables Vol C Tables 4.2.6.8 and 6.1.1.4'
  'O'  'O'   0.0106   0.0060
  'International Tables Vol C Tables 4.2.6.8 and 6.1.1.4'
 
_symmetry_cell_setting           'Orthorhombic'
_symmetry_space_group_name_H-M   'Pbcn '
 
loop_
  _symmetry_equiv_pos_as_xyz
  'x, y, z'
  '-x+1/2, -y+1/2, z+1/2'
  '-x, y, -z+1/2'
  'x+1/2, -y+1/2, -z'
  '-x, -y, -z'
  'x-1/2, y-1/2, -z-1/2'
  'x, -y, z-1/2'
  '-x-1/2, y-1/2, z'
 
_cell_length_a                    18.966(3)
_cell_length_b                    15.462(2)
_cell_length_c                    14.102(2)
_cell_angle_alpha                 90.00
_cell_angle_beta                  90.00
_cell_angle_gamma                 90.00
_cell_volume                      4135.5(11)
_cell_formula_units_Z             4
_cell_measurement_temperature     293(2)
_cell_measurement_reflns_used     2728
_cell_measurement_theta_min       2.23
_cell_measurement_theta_max       19.69
 
_exptl_crystal_description        block
_exptl_crystal_colour             orange
_exptl_crystal_size_max           0.40
_exptl_crystal_size_mid           0.30
_exptl_crystal_size_min           0.30
_exptl_crystal_density_meas       ?
_exptl_crystal_density_diffrn     1.600
_exptl_crystal_density_method     'not measured'
_exptl_crystal_F_000              2032
_exptl_absorpt_coefficient_mu     1.538
_exptl_absorpt_correction_type    ?
_exptl_absorpt_correction_type    'empirical'
_exptl_absorpt_correction_T_min   0.5294
_exptl_absorpt_correction_T_max   0.6758
_exptl_absorpt_process_details    sadabs
 
_exptl_special_details
;
  ?
;
 
_diffrn_ambient_temperature       293(2)
_diffrn_radiation_wavelength      0.71073
_diffrn_radiation_type            MoK\a
_diffrn_radiation_source          'fine-focus sealed tube'
_diffrn_radiation_monochromator   graphite
_diffrn_measurement_device_type  'CCD area detector'
_diffrn_measurement_method       'phi and omega scans'
_diffrn_reflns_number             20134
_diffrn_reflns_av_R_equivalents   0.0840
_diffrn_reflns_av_sigmaI/netI     0.0663
_diffrn_reflns_limit_h_min        -11
_diffrn_reflns_limit_h_max        22
_diffrn_reflns_limit_k_min        -18
_diffrn_reflns_limit_k_max        18
_diffrn_reflns_limit_l_min        -16
_diffrn_reflns_limit_l_max        16
_diffrn_reflns_theta_min          2.15
_diffrn_reflns_theta_max          25.00
_reflns_number_total              3646
_reflns_number_gt                 2239
_reflns_threshold_expression      >2sigma(I)
 
_computing_data_collection      'Bruker SMART'
_computing_cell_refinement      'Bruker SMART'
_computing_data_reduction       'Bruker SAINT'
_computing_structure_solution   'Bruker SHELXTL'
_computing_structure_refinement 'Bruker SHELXTL'
_computing_molecular_graphics   'Bruker SHELXTL'
_computing_publication_material 'Bruker SHELXTL'
 
_refine_special_details
;
  Refinement of F^2^ against ALL reflections.  The weighted R-factor wR and
  goodness of fit S are based on F^2^, conventional R-factors R are based
  on F, with F set to zero for negative F^2^. The threshold expression of
  F^2^ > 2sigma(F^2^) is used only for calculating R-factors(gt) etc. and is
  not relevant to the choice of reflections for refinement.  R-factors based
  on F^2^ are statistically about twice as large as those based on F, and R-
  factors based on ALL data will be even larger.
;
 
_refine_ls_structure_factor_coef  Fsqd
_refine_ls_matrix_type            full
_refine_ls_weighting_scheme       calc
_refine_ls_weighting_details
  'calc w=1/[\s^2^(Fo^2^)+(0.0200P)^2^+0.0000P] where P=(Fo^2^+2Fc^2^)/3'
_atom_sites_solution_primary      direct
_atom_sites_solution_secondary    difmap
_atom_sites_solution_hydrogens    geom
_refine_ls_hydrogen_treatment     mixed
_refine_ls_extinction_method      none
_refine_ls_extinction_coef        ?
_refine_ls_number_reflns          3646
_refine_ls_number_parameters      280
_refine_ls_number_restraints      0
_refine_ls_R_factor_all           0.0918
_refine_ls_R_factor_gt            0.0506
_refine_ls_wR_factor_ref          0.0798
_refine_ls_wR_factor_gt           0.0743
_refine_ls_goodness_of_fit_ref    1.056
_refine_ls_restrained_S_all       1.056
_refine_ls_shift/su_max           0.000
_refine_ls_shift/su_mean          0.000
 
loop_
  _atom_site_label
  _atom_site_type_symbol
  _atom_site_fract_x
  _atom_site_fract_y
  _atom_site_fract_z
  _atom_site_U_iso_or_equiv
  _atom_site_adp_type
  _atom_site_occupancy
  _atom_site_symmetry_multiplicity
  _atom_site_calc_flag
  _atom_site_refinement_flags
  _atom_site_disorder_assembly
  _atom_site_disorder_group
Co1 Co 0.47545(3) 0.24298(3) 0.37341(4) 0.04376(17) Uani 1 1 d . . .
Fe1 Fe 0.23544(3) 0.19989(4) 0.23525(4) 0.0557(2) Uani 1 1 d . . .
O1W O 0.5000 0.3240(3) 0.2500 0.0440(11) Uani 1 2 d S . .
O1 O 0.42250(14) 0.15211(16) 0.28937(18) 0.0468(7) Uani 1 1 d . . .
O2 O 0.42490(13) 0.20064(16) 0.13999(18) 0.0462(7) Uani 1 1 d . . .
O3 O 0.37639(15) 0.29826(17) 0.38790(19) 0.0551(8) Uani 1 1 d . . .
O4 O 0.37096(15) 0.38138(17) 0.2575(2) 0.0544(8) Uani 1 1 d . . .
N1 N 0.5185(2) 0.3374(2) 0.4721(2) 0.0484(9) Uani 1 1 d . . .
N2 N 0.4609(2) 0.1571(2) 0.4894(2) 0.0475(9) Uani 1 1 d . . .
C1 C 0.5804(3) 0.3755(3) 0.4628(3) 0.0664(14) Uani 1 1 d . . .
H1A H 0.6082 0.3594 0.4114 0.080 Uiso 1 1 calc R . .
C2 C 0.6069(4) 0.4371(3) 0.5230(4) 0.091(2) Uani 1 1 d . . .
H2A H 0.6516 0.4605 0.5133 0.109 Uiso 1 1 calc R . .
C3 C 0.5671(4) 0.4627(4) 0.5958(5) 0.107(3) Uani 1 1 d . . .
H3A H 0.5829 0.5063 0.6359 0.128 Uiso 1 1 calc R . .
C4 C 0.5063(4) 0.4268(4) 0.6106(4) 0.096(2) Uani 1 1 d . . .
H4A H 0.4788 0.4426 0.6624 0.115 Uiso 1 1 calc R . .
C5 C 0.4823(3) 0.3619(3) 0.5449(4) 0.0799(16) Uani 1 1 d . . .
H5A H 0.4386 0.3363 0.5554 0.096 Uiso 1 1 calc R . .
C6 C 0.4020(3) 0.1124(3) 0.5019(3) 0.0623(13) Uani 1 1 d . . .
H6A H 0.3636 0.1247 0.4633 0.075 Uiso 1 1 calc R . .
C7 C 0.3950(3) 0.0485(3) 0.5692(3) 0.0786(17) Uani 1 1 d . . .
H7A H 0.3528 0.0185 0.5758 0.094 Uiso 1 1 calc R . .
C8 C 0.4517(4) 0.0300(3) 0.6265(4) 0.0837(18) Uani 1 1 d . . .
H8A H 0.4487 -0.0129 0.6725 0.100 Uiso 1 1 calc R . .
C9 C 0.5120(3) 0.0754(3) 0.6146(3) 0.0742(15) Uani 1 1 d . . .
H9A H 0.5511 0.0642 0.6524 0.089 Uiso 1 1 calc R . .
C10 C 0.5146(3) 0.1378(3) 0.5464(3) 0.0625(14) Uani 1 1 d . . .
H10A H 0.5564 0.1687 0.5393 0.075 Uiso 1 1 calc R . .
C11 C 0.3950(2) 0.1647(2) 0.2095(3) 0.0430(10) Uani 1 1 d . . .
C12 C 0.3222(2) 0.1339(3) 0.1921(3) 0.0466(11) Uani 1 1 d . . .
C13 C 0.2807(2) 0.1575(3) 0.1127(3) 0.0609(12) Uani 1 1 d . . .
H13A H 0.2958 0.1937 0.0594 0.073 Uiso 1 1 calc R . .
C14 C 0.2146(3) 0.1194(3) 0.1238(4) 0.0780(15) Uani 1 1 d . . .
H14A H 0.1749 0.1252 0.0797 0.094 Uiso 1 1 calc R . .
C15 C 0.2138(3) 0.0722(3) 0.2083(4) 0.0748(15) Uani 1 1 d . . .
H15A H 0.1737 0.0394 0.2333 0.090 Uiso 1 1 calc R . .
C16 C 0.2802(2) 0.0809(3) 0.2518(3) 0.0564(12) Uani 1 1 d . . .
H16A H 0.2949 0.0546 0.3119 0.068 Uiso 1 1 calc R . .
C17 C 0.3438(3) 0.3311(3) 0.3184(3) 0.0526(12) Uani 1 1 d . . .
C18 C 0.2680(2) 0.3077(3) 0.3058(3) 0.0533(11) Uani 1 1 d . . .
C19 C 0.2247(2) 0.3306(3) 0.2295(3) 0.0592(12) Uani 1 1 d . . .
H19A H 0.2385 0.3675 0.1761 0.071 Uiso 1 1 calc R . .
C20 C 0.1591(3) 0.2918(3) 0.2417(4) 0.0718(14) Uani 1 1 d . . .
H20A H 0.1187 0.2970 0.1987 0.086 Uiso 1 1 calc R . .
C21 C 0.1609(3) 0.2441(3) 0.3258(4) 0.0731(14) Uani 1 1 d . . .
H21A H 0.1218 0.2103 0.3522 0.088 Uiso 1 1 calc R . .
C22 C 0.2281(3) 0.2537(3) 0.3662(3) 0.0610(12) Uani 1 1 d . . .
H22A H 0.2443 0.2278 0.4258 0.073 Uiso 1 1 calc R . .
H1WA H 0.459(2) 0.354(3) 0.250(3) 0.078(16) Uiso 1 1 d . . .
 
loop_
  _atom_site_aniso_label
  _atom_site_aniso_U_11
  _atom_site_aniso_U_22
  _atom_site_aniso_U_33
  _atom_site_aniso_U_23
  _atom_site_aniso_U_13
  _atom_site_aniso_U_12
Co1 0.0529(4) 0.0406(3) 0.0378(3) -0.0012(3) -0.0004(3) 0.0031(3)
Fe1 0.0491(4) 0.0526(4) 0.0653(4) -0.0013(3) 0.0023(4) -0.0007(4)
O1W 0.048(3) 0.040(2) 0.044(3) 0.000 -0.003(2) 0.000
O1 0.0551(19) 0.0467(17) 0.0386(17) -0.0007(13) -0.0035(15) 0.0012(15)
O2 0.0488(18) 0.0503(16) 0.0395(17) 0.0024(14) 0.0014(14) -0.0066(15)
O3 0.057(2) 0.0589(18) 0.0492(19) -0.0051(15) -0.0032(16) 0.0141(16)
O4 0.057(2) 0.0442(17) 0.062(2) 0.0000(15) -0.0067(17) 0.0037(16)
N1 0.063(3) 0.045(2) 0.037(2) -0.0065(17) 0.005(2) 0.011(2)
N2 0.059(3) 0.047(2) 0.037(2) 0.0040(16) 0.003(2) -0.002(2)
C1 0.086(4) 0.055(3) 0.058(3) 0.004(3) -0.012(3) 0.001(3)
C2 0.146(6) 0.060(4) 0.067(4) -0.007(3) -0.029(4) 0.015(4)
C3 0.125(7) 0.066(4) 0.129(6) -0.012(4) -0.083(6) 0.009(4)
C4 0.143(6) 0.087(4) 0.058(4) -0.038(3) -0.026(4) 0.047(4)
C5 0.075(4) 0.079(4) 0.087(4) 0.003(3) -0.011(4) 0.019(3)
C6 0.070(4) 0.065(3) 0.053(3) 0.000(3) 0.007(3) -0.010(3)
C7 0.108(5) 0.062(3) 0.066(4) 0.001(3) 0.024(3) -0.030(3)
C8 0.151(6) 0.049(3) 0.051(3) 0.009(3) 0.007(4) -0.009(4)
C9 0.107(5) 0.067(3) 0.049(3) 0.005(3) -0.011(3) 0.000(3)
C10 0.089(4) 0.052(3) 0.046(3) 0.008(2) -0.007(3) -0.008(3)
C11 0.050(3) 0.033(2) 0.046(3) -0.007(2) 0.004(2) 0.004(2)
C12 0.048(3) 0.045(3) 0.047(3) -0.013(2) 0.003(2) 0.000(2)
C13 0.058(3) 0.067(3) 0.058(3) -0.005(2) -0.003(3) -0.002(3)
C14 0.052(4) 0.097(4) 0.086(4) -0.027(3) -0.013(3) -0.012(3)
C15 0.060(4) 0.061(3) 0.103(4) -0.018(3) 0.020(3) -0.017(3)
C16 0.062(3) 0.040(2) 0.067(3) -0.002(2) 0.010(3) -0.006(3)
C17 0.059(4) 0.041(3) 0.058(3) -0.021(2) -0.003(3) 0.015(3)
C18 0.045(3) 0.048(3) 0.067(3) -0.006(2) 0.001(3) 0.005(3)
C19 0.046(3) 0.052(3) 0.079(3) 0.002(2) -0.006(3) 0.002(2)
C20 0.052(3) 0.066(3) 0.097(4) 0.004(3) -0.010(3) 0.008(3)
C21 0.050(3) 0.066(3) 0.104(4) -0.002(3) 0.021(3) 0.002(3)
C22 0.067(3) 0.057(3) 0.059(3) -0.007(3) 0.010(3) 0.011(3)
 
_geom_special_details
;
  All esds (except the esd in the dihedral angle between two l.s. planes)
  are estimated using the full covariance matrix.  The cell esds are taken
  into account individually in the estimation of esds in distances, angles
  and torsion angles; correlations between esds in cell parameters are only
  used when they are defined by crystal symmetry.  An approximate (isotropic)
  treatment of cell esds is used for estimating esds involving l.s. planes.
;
 
loop_
  _geom_bond_atom_site_label_1
  _geom_bond_atom_site_label_2
  _geom_bond_distance
  _geom_bond_site_symmetry_2
  _geom_bond_publ_flag
Co1 O2 2.009(3) 3_655 ?
Co1 O3 2.074(3) . ?
Co1 O1 2.095(3) . ?
Co1 N2 2.125(3) . ?
Co1 N1 2.175(3) . ?
Co1 O1W 2.194(2) . ?
Fe1 C21 2.025(4) . ?
Fe1 C12 2.030(4) . ?
Fe1 C20 2.031(4) . ?
Fe1 C22 2.031(4) . ?
Fe1 C19 2.033(4) . ?
Fe1 C18 2.037(4) . ?
Fe1 C13 2.037(4) . ?
Fe1 C16 2.039(4) . ?
Fe1 C14 2.044(5) . ?
Fe1 C15 2.052(5) . ?
O1W Co1 2.194(2) 3_655 ?
O1W H1WA 0.90(4) . ?
O1 C11 1.256(4) . ?
O2 C11 1.262(4) . ?
O2 Co1 2.009(3) 3_655 ?
O3 C17 1.266(5) . ?
O4 C17 1.268(5) . ?
N1 C5 1.292(5) . ?
N1 C1 1.321(5) . ?
N2 C6 1.326(5) . ?
N2 C10 1.331(5) . ?
C1 C2 1.372(6) . ?
C1 H1A 0.9300 . ?
C2 C3 1.335(8) . ?
C2 H2A 0.9300 . ?
C3 C4 1.297(7) . ?
C3 H3A 0.9300 . ?
C4 C5 1.441(6) . ?
C4 H4A 0.9300 . ?
C5 H5A 0.9300 . ?
C6 C7 1.376(5) . ?
C6 H6A 0.9300 . ?
C7 C8 1.375(6) . ?
C7 H7A 0.9300 . ?
C8 C9 1.352(6) . ?
C8 H8A 0.9300 . ?
C9 C10 1.363(5) . ?
C9 H9A 0.9300 . ?
C10 H10A 0.9300 . ?
C11 C12 1.480(5) . ?
C12 C13 1.417(5) . ?
C12 C16 1.420(5) . ?
C13 C14 1.394(6) . ?
C13 H13A 0.9800 . ?
C14 C15 1.397(6) . ?
C14 H14A 0.9800 . ?
C15 C16 1.408(6) . ?
C15 H15A 0.9800 . ?
C16 H16A 0.9800 . ?
C17 C18 1.493(6) . ?
C18 C19 1.399(5) . ?
C18 C22 1.413(5) . ?
C19 C20 1.393(6) . ?
C19 H19A 0.9800 . ?
C20 C21 1.396(6) . ?
C20 H20A 0.9800 . ?
C21 C22 1.404(6) . ?
C21 H21A 0.9800 . ?
C22 H22A 0.9800 . ?
 
loop_
  _geom_angle_atom_site_label_1
  _geom_angle_atom_site_label_2
  _geom_angle_atom_site_label_3
  _geom_angle
  _geom_angle_site_symmetry_1
  _geom_angle_site_symmetry_3
  _geom_angle_publ_flag
O2 Co1 O3 174.66(10) 3_655 . ?
O2 Co1 O1 100.33(10) 3_655 . ?
O3 Co1 O1 84.14(10) . . ?
O2 Co1 N2 89.47(12) 3_655 . ?
O3 Co1 N2 93.69(12) . . ?
O1 Co1 N2 87.39(12) . . ?
O2 Co1 N1 85.75(12) 3_655 . ?
O3 Co1 N1 90.01(12) . . ?
O1 Co1 N1 172.68(13) . . ?
N2 Co1 N1 88.60(13) . . ?
O2 Co1 O1W 84.93(8) 3_655 . ?
O3 Co1 O1W 92.02(9) . . ?
O1 Co1 O1W 92.05(10) . . ?
N2 Co1 O1W 174.18(11) . . ?
N1 Co1 O1W 92.55(12) . . ?
C21 Fe1 C12 157.7(2) . . ?
C21 Fe1 C20 40.28(17) . . ?
C12 Fe1 C20 160.6(2) . . ?
C21 Fe1 C22 40.52(16) . . ?
C12 Fe1 C22 122.30(18) . . ?
C20 Fe1 C22 67.89(18) . . ?
C21 Fe1 C19 67.64(19) . . ?
C12 Fe1 C19 124.64(18) . . ?
C20 Fe1 C19 40.10(16) . . ?
C22 Fe1 C19 67.81(18) . . ?
C21 Fe1 C18 68.10(18) . . ?
C12 Fe1 C18 108.18(17) . . ?
C20 Fe1 C18 67.76(18) . . ?
C22 Fe1 C18 40.65(15) . . ?
C19 Fe1 C18 40.20(15) . . ?
C21 Fe1 C13 159.7(2) . . ?
C12 Fe1 C13 40.77(15) . . ?
C20 Fe1 C13 124.3(2) . . ?
C22 Fe1 C13 158.78(19) . . ?
C19 Fe1 C13 109.13(19) . . ?
C18 Fe1 C13 123.36(19) . . ?
C21 Fe1 C16 121.5(2) . . ?
C12 Fe1 C16 40.86(15) . . ?
C20 Fe1 C16 157.3(2) . . ?
C22 Fe1 C16 107.09(18) . . ?
C19 Fe1 C16 160.56(19) . . ?
C18 Fe1 C16 123.80(18) . . ?
C13 Fe1 C16 68.40(17) . . ?
C21 Fe1 C14 123.7(2) . . ?
C12 Fe1 C14 67.70(17) . . ?
C20 Fe1 C14 108.8(2) . . ?
C22 Fe1 C14 159.4(2) . . ?
C19 Fe1 C14 123.7(2) . . ?
C18 Fe1 C14 158.9(2) . . ?
C13 Fe1 C14 39.95(16) . . ?
C16 Fe1 C14 67.64(19) . . ?
C21 Fe1 C15 107.6(2) . . ?
C12 Fe1 C15 67.88(18) . . ?
C20 Fe1 C15 122.6(2) . . ?
C22 Fe1 C15 123.3(2) . . ?
C19 Fe1 C15 158.3(2) . . ?
C18 Fe1 C15 159.8(2) . . ?
C13 Fe1 C15 67.52(18) . . ?
C16 Fe1 C15 40.25(17) . . ?
C14 Fe1 C15 39.89(17) . . ?
Co1 O1W Co1 110.39(17) 3_655 . ?
Co1 O1W H1WA 118(3) 3_655 . ?
Co1 O1W H1WA 96(3) . . ?
C11 O1 Co1 127.0(2) . . ?
C11 O2 Co1 129.8(3) . 3_655 ?
C17 O3 Co1 122.1(3) . . ?
C5 N1 C1 114.9(4) . . ?
C5 N1 Co1 120.3(4) . . ?
C1 N1 Co1 124.7(3) . . ?
C6 N2 C10 116.6(4) . . ?
C6 N2 Co1 122.5(3) . . ?
C10 N2 Co1 120.4(3) . . ?
N1 C1 C2 125.1(5) . . ?
N1 C1 H1A 117.4 . . ?
C2 C1 H1A 117.4 . . ?
C3 C2 C1 118.3(6) . . ?
C3 C2 H2A 120.9 . . ?
C1 C2 H2A 120.9 . . ?
C4 C3 C2 120.0(7) . . ?
C4 C3 H3A 120.0 . . ?
C2 C3 H3A 120.0 . . ?
C3 C4 C5 118.4(6) . . ?
C3 C4 H4A 120.8 . . ?
C5 C4 H4A 120.8 . . ?
N1 C5 C4 123.2(5) . . ?
N1 C5 H5A 118.4 . . ?
C4 C5 H5A 118.4 . . ?
N2 C6 C7 123.2(5) . . ?
N2 C6 H6A 118.4 . . ?
C7 C6 H6A 118.4 . . ?
C8 C7 C6 118.6(5) . . ?
C8 C7 H7A 120.7 . . ?
C6 C7 H7A 120.7 . . ?
C9 C8 C7 118.7(5) . . ?
C9 C8 H8A 120.6 . . ?
C7 C8 H8A 120.6 . . ?
C8 C9 C10 119.1(5) . . ?
C8 C9 H9A 120.4 . . ?
C10 C9 H9A 120.4 . . ?
N2 C10 C9 123.8(5) . . ?
N2 C10 H10A 118.1 . . ?
C9 C10 H10A 118.1 . . ?
O1 C11 O2 125.3(4) . . ?
O1 C11 C12 119.1(4) . . ?
O2 C11 C12 115.6(4) . . ?
C13 C12 C16 107.7(4) . . ?
C13 C12 C11 124.5(4) . . ?
C16 C12 C11 127.7(4) . . ?
C13 C12 Fe1 69.9(2) . . ?
C16 C12 Fe1 69.9(2) . . ?
C11 C12 Fe1 123.0(3) . . ?
C14 C13 C12 107.7(4) . . ?
C14 C13 Fe1 70.3(3) . . ?
C12 C13 Fe1 69.3(2) . . ?
C14 C13 H13A 126.2 . . ?
C12 C13 H13A 126.2 . . ?
Fe1 C13 H13A 126.2 . . ?
C13 C14 C15 109.0(5) . . ?
C13 C14 Fe1 69.8(3) . . ?
C15 C14 Fe1 70.4(3) . . ?
C13 C14 H14A 125.5 . . ?
C15 C14 H14A 125.5 . . ?
Fe1 C14 H14A 125.5 . . ?
C14 C15 C16 108.2(4) . . ?
C14 C15 Fe1 69.7(3) . . ?
C16 C15 Fe1 69.4(2) . . ?
C14 C15 H15A 125.9 . . ?
C16 C15 H15A 125.9 . . ?
Fe1 C15 H15A 125.9 . . ?
C15 C16 C12 107.4(4) . . ?
C15 C16 Fe1 70.4(3) . . ?
C12 C16 Fe1 69.2(2) . . ?
C15 C16 H16A 126.3 . . ?
C12 C16 H16A 126.3 . . ?
Fe1 C16 H16A 126.3 . . ?
O3 C17 O4 124.9(4) . . ?
O3 C17 C18 117.7(4) . . ?
O4 C17 C18 117.4(4) . . ?
C19 C18 C22 107.4(4) . . ?
C19 C18 C17 126.5(4) . . ?
C22 C18 C17 126.0(4) . . ?
C19 C18 Fe1 69.7(2) . . ?
C22 C18 Fe1 69.4(2) . . ?
C17 C18 Fe1 123.2(3) . . ?
C20 C19 C18 108.6(4) . . ?
C20 C19 Fe1 69.9(3) . . ?
C18 C19 Fe1 70.1(2) . . ?
C20 C19 H19A 125.7 . . ?
C18 C19 H19A 125.7 . . ?
Fe1 C19 H19A 125.7 . . ?
C19 C20 C21 108.1(5) . . ?
C19 C20 Fe1 70.0(3) . . ?
C21 C20 Fe1 69.6(3) . . ?
C19 C20 H20A 125.9 . . ?
C21 C20 H20A 125.9 . . ?
Fe1 C20 H20A 125.9 . . ?
C20 C21 C22 108.1(4) . . ?
C20 C21 Fe1 70.1(3) . . ?
C22 C21 Fe1 70.0(2) . . ?
C20 C21 H21A 125.9 . . ?
C22 C21 H21A 125.9 . . ?
Fe1 C21 H21A 125.9 . . ?
C21 C22 C18 107.7(4) . . ?
C21 C22 Fe1 69.5(3) . . ?
C18 C22 Fe1 69.9(2) . . ?
C21 C22 H22A 126.2 . . ?
C18 C22 H22A 126.2 . . ?
Fe1 C22 H22A 126.2 . . ?
 
_diffrn_measured_fraction_theta_max    1.000
_diffrn_reflns_theta_full              25.00
_diffrn_measured_fraction_theta_full   1.000
_refine_diff_density_max    0.509
_refine_diff_density_min   -0.308
_refine_diff_density_rms    0.080

#===END

data_compound_4
 
_audit_creation_method            SHELXL-97
_chemical_name_systematic
;
  ?
;
_chemical_name_common             ?
_chemical_melting_point           ?
_chemical_formula_moiety          ?
_chemical_formula_sum
  'C40 H40 Fe3 La2 O16'
_chemical_formula_weight          1222.09
 
loop_
  _atom_type_symbol
  _atom_type_description
  _atom_type_scat_dispersion_real
  _atom_type_scat_dispersion_imag
  _atom_type_scat_source
  'C'  'C'   0.0033   0.0016
  'International Tables Vol C Tables 4.2.6.8 and 6.1.1.4'
  'H'  'H'   0.0000   0.0000
  'International Tables Vol C Tables 4.2.6.8 and 6.1.1.4'
  'O'  'O'   0.0106   0.0060
  'International Tables Vol C Tables 4.2.6.8 and 6.1.1.4'
  'La'  'La'  -0.2871   2.4523
  'International Tables Vol C Tables 4.2.6.8 and 6.1.1.4'
  'Fe'  'Fe'   0.3463   0.8444
  'International Tables Vol C Tables 4.2.6.8 and 6.1.1.4'
 
_symmetry_cell_setting           'Triclinic'
_symmetry_space_group_name_H-M   'P-1   '
loop_
  _symmetry_equiv_pos_as_xyz
  'x, y, z'
  '-x, -y, -z'
 
_cell_length_a                    9.5149(14)
_cell_length_b                    10.3318(15)
_cell_length_c                    11.0945(15)
_cell_angle_alpha                 92.139(3)
_cell_angle_beta                  109.367(3)
_cell_angle_gamma                 97.289(2)
_cell_volume                      1016.9(3)
_cell_formula_units_Z             1
_cell_measurement_temperature     293(2)
_cell_measurement_reflns_used     1589
_cell_measurement_theta_min       2.30
_cell_measurement_theta_max       23.86
 
_exptl_crystal_description        block
_exptl_crystal_colour             red
_exptl_crystal_size_max           0.20
_exptl_crystal_size_mid           0.10
_exptl_crystal_size_min           0.10
_exptl_crystal_density_meas       ?
_exptl_crystal_density_diffrn     1.996
_exptl_crystal_density_method     'not measured'
_exptl_crystal_F_000              600
_exptl_absorpt_coefficient_mu     3.174
_exptl_absorpt_correction_type    empirical
_exptl_absorpt_correction_T_min   0.5703
_exptl_absorpt_correction_T_max   0.7456
_exptl_absorpt_process_details    sadabs
 
_exptl_special_details
;
  ?
;
 
_diffrn_ambient_temperature       293(2)
_diffrn_radiation_wavelength      0.71073
_diffrn_radiation_type            MoK\a
_diffrn_radiation_source          'fine-focus sealed tube'
_diffrn_radiation_monochromator   graphite
_diffrn_measurement_device_type  'CCD area detector'
_diffrn_measurement_method       'phi and omega scans'
_diffrn_reflns_number             5280
_diffrn_reflns_av_R_equivalents   0.0429
_diffrn_reflns_av_sigmaI/netI     0.0890
_diffrn_reflns_limit_h_min        -11
_diffrn_reflns_limit_h_max        11
_diffrn_reflns_limit_k_min        -11
_diffrn_reflns_limit_k_max        12
_diffrn_reflns_limit_l_min        -9
_diffrn_reflns_limit_l_max        13
_diffrn_reflns_theta_min          1.95
_diffrn_reflns_theta_max          25.00
_reflns_number_total              3522
_reflns_number_gt                 2729
_reflns_threshold_expression      >2sigma(I)
 
_computing_data_collection      'Bruker SMART'
_computing_cell_refinement      'Bruker SMART'
_computing_data_reduction       'Bruker SAINT'
_computing_structure_solution   'Bruker SHELXTL'
_computing_structure_refinement 'Bruker SHELXTL'
_computing_molecular_graphics   'Bruker SHELXTL'
_computing_publication_material 'Bruker SHELXTL'
 
_refine_special_details
;
  Refinement of F^2^ against ALL reflections.  The weighted R-factor wR and
  goodness of fit S are based on F^2^, conventional R-factors R are based
  on F, with F set to zero for negative F^2^. The threshold expression of
  F^2^ > 2sigma(F^2^) is used only for calculating R-factors(gt) etc. and is
  not relevant to the choice of reflections for refinement.  R-factors based
  on F^2^ are statistically about twice as large as those based on F, and R-
  factors based on ALL data will be even larger.
;
 
_refine_ls_structure_factor_coef  Fsqd
_refine_ls_matrix_type            full
_refine_ls_weighting_scheme       calc
_refine_ls_weighting_details
  'calc w=1/[\s^2^(Fo^2^)+(0.0100P)^2^+0.0000P] where P=(Fo^2^+2Fc^2^)/3'
_atom_sites_solution_primary      direct
_atom_sites_solution_secondary    difmap
_atom_sites_solution_hydrogens    geom
_refine_ls_hydrogen_treatment     mixed
_refine_ls_extinction_method      none
_refine_ls_extinction_coef        ?
_refine_ls_number_reflns          3522
_refine_ls_number_parameters      277
_refine_ls_number_restraints      0
_refine_ls_R_factor_all           0.0620
_refine_ls_R_factor_gt            0.0430
_refine_ls_wR_factor_ref          0.0704
_refine_ls_wR_factor_gt           0.0673
_refine_ls_goodness_of_fit_ref    1.036
_refine_ls_restrained_S_all       1.036
_refine_ls_shift/su_max           0.001
_refine_ls_shift/su_mean          0.000
 
loop_
  _atom_site_label
  _atom_site_type_symbol
  _atom_site_fract_x
  _atom_site_fract_y
  _atom_site_fract_z
  _atom_site_U_iso_or_equiv
  _atom_site_adp_type
  _atom_site_occupancy
  _atom_site_symmetry_multiplicity
  _atom_site_calc_flag
  _atom_site_refinement_flags
  _atom_site_disorder_assembly
  _atom_site_disorder_group
La1 La 0.73788(4) 0.53083(4) 0.97076(3) 0.02746(12) Uani 1 1 d . . .
Fe1 Fe 1.13243(10) 0.80223(9) 1.39055(8) 0.0332(3) Uani 1 1 d . . .
Fe2 Fe 0.5000 1.0000 1.0000 0.0337(4) Uani 1 2 d S . .
O1 O 0.7401(4) 0.6335(4) 1.1891(4) 0.0342(11) Uani 1 1 d . . .
O2 O 0.9085(4) 0.5016(4) 1.2016(4) 0.0310(11) Uani 1 1 d . . .
O3 O 0.9275(5) 0.7382(4) 1.0460(4) 0.0367(11) Uani 1 1 d . . .
O4 O 1.1226(5) 0.6344(4) 1.0687(4) 0.0415(12) Uani 1 1 d . . .
C1 C 0.8643(7) 0.5935(6) 1.2497(6) 0.0280(16) Uani 1 1 d . . .
C2 C 0.9562(7) 0.6599(7) 1.3763(6) 0.0318(16) Uani 1 1 d . . .
C3 C 1.0936(8) 0.6266(7) 1.4574(6) 0.0423(19) Uani 1 1 d . . .
H3A H 1.1375 0.5483 1.4458 0.051 Uiso 1 1 calc R . .
C4 C 1.1528(9) 0.7238(8) 1.5609(6) 0.053(2) Uani 1 1 d . . .
H4A H 1.2468 0.7258 1.6331 0.064 Uiso 1 1 calc R . .
O5 O 0.5933(5) 0.7029(4) 0.8756(4) 0.0481(13) Uani 1 1 d . . .
O6 O 0.4320(5) 0.6337(4) 0.9698(4) 0.0462(13) Uani 1 1 d . . .
O7 O 0.8258(5) 0.5812(4) 0.7807(4) 0.0360(11) Uani 1 1 d . . .
H7A H 0.8493 0.5122 0.7383 0.043 Uiso 1 1 calc R . .
O8 O 0.5170(4) 0.4243(4) 0.7695(3) 0.0344(11) Uani 1 1 d . . .
H8A H 0.4640 0.3463 0.7806 0.041 Uiso 1 1 calc R . .
C5 C 1.0588(8) 0.8163(8) 1.5417(6) 0.053(2) Uani 1 1 d . . .
H5A H 1.0752 0.8958 1.5985 0.064 Uiso 1 1 calc R . .
C6 C 0.9355(8) 0.7811(7) 1.4268(6) 0.044(2) Uani 1 1 d . . .
H6A H 0.8506 0.8291 1.3911 0.053 Uiso 1 1 calc R . .
C7 C 1.0616(7) 0.7246(6) 1.1015(6) 0.0289(16) Uani 1 1 d . . .
C8 C 1.1551(7) 0.8156(6) 1.2161(6) 0.0303(16) Uani 1 1 d . . .
C9 C 1.2915(7) 0.7923(7) 1.3062(6) 0.0398(18) Uani 1 1 d . . .
H9A H 1.3427 0.7165 1.3020 0.048 Uiso 1 1 calc R . .
C10 C 1.3405(8) 0.8945(7) 1.4055(6) 0.0454(19) Uani 1 1 d . . .
H10A H 1.4315 0.9023 1.4815 0.054 Uiso 1 1 calc R . .
C11 C 1.2368(8) 0.9825(7) 1.3762(6) 0.045(2) Uani 1 1 d . . .
H11A H 1.2422 1.0629 1.4283 0.055 Uiso 1 1 calc R . .
C12 C 1.1203(8) 0.9348(7) 1.2575(6) 0.0413(18) Uani 1 1 d . . .
H12A H 1.0325 0.9767 1.2135 0.050 Uiso 1 1 calc R . .
C13 C 0.4824(7) 0.7181(6) 0.9080(6) 0.0308(16) Uani 1 1 d . . .
C14 C 0.4137(7) 0.8363(6) 0.8779(5) 0.0278(15) Uani 1 1 d . . .
C15 C 0.4688(8) 0.9400(7) 0.8165(6) 0.0417(19) Uani 1 1 d . . .
H15A H 0.5486 0.9378 0.7791 0.050 Uiso 1 1 calc R . .
C16 C 0.3919(11) 1.0447(8) 0.8194(7) 0.068(3) Uani 1 1 d . . .
H16A H 0.4078 1.1289 0.7846 0.081 Uiso 1 1 calc R . .
C17 C 0.2893(8) 1.0101(8) 0.8817(8) 0.066(3) Uani 1 1 d . . .
H17A H 0.2210 1.0664 0.8982 0.079 Uiso 1 1 calc R . .
C18 C 0.3002(7) 0.8804(8) 0.9186(7) 0.049(2) Uani 1 1 d . . .
H18A H 0.2410 0.8311 0.9637 0.059 Uiso 1 1 calc R . .
C19 C 0.8411(8) 0.7076(7) 0.7354(7) 0.063(2) Uani 1 1 d . . .
H19A H 0.8748 0.7022 0.6630 0.094 Uiso 1 1 calc R . .
H19B H 0.9133 0.7669 0.8024 0.094 Uiso 1 1 calc R . .
H19C H 0.7455 0.7388 0.7101 0.094 Uiso 1 1 calc R . .
C20 C 0.4661(8) 0.4682(8) 0.6455(6) 0.059(2) Uani 1 1 d . . .
H20A H 0.3824 0.4070 0.5912 0.088 Uiso 1 1 calc R . .
H20B H 0.5462 0.4750 0.6105 0.088 Uiso 1 1 calc R . .
H20C H 0.4349 0.5525 0.6504 0.088 Uiso 1 1 calc R . .
 
loop_
  _atom_site_aniso_label
  _atom_site_aniso_U_11
  _atom_site_aniso_U_22
  _atom_site_aniso_U_33
  _atom_site_aniso_U_23
  _atom_site_aniso_U_13
  _atom_site_aniso_U_12
La1 0.0313(2) 0.0256(2) 0.0251(2) -0.00071(16) 0.00967(16) 0.00340(17)
Fe1 0.0313(6) 0.0333(6) 0.0311(5) -0.0059(5) 0.0090(4) -0.0023(5)
Fe2 0.0314(8) 0.0272(8) 0.0357(8) -0.0039(6) 0.0002(6) 0.0117(6)
O1 0.028(3) 0.045(3) 0.030(2) -0.003(2) 0.010(2) 0.006(2)
O2 0.037(3) 0.028(3) 0.030(2) -0.003(2) 0.013(2) 0.007(2)
O3 0.036(3) 0.036(3) 0.036(3) 0.002(2) 0.010(2) 0.003(2)
O4 0.061(3) 0.032(3) 0.037(3) 0.001(2) 0.022(2) 0.013(3)
C1 0.034(4) 0.020(4) 0.030(4) 0.005(3) 0.014(3) -0.004(3)
C2 0.033(4) 0.039(5) 0.026(4) -0.001(3) 0.016(3) 0.000(3)
C3 0.047(5) 0.040(5) 0.033(4) 0.002(3) 0.010(3) -0.004(4)
C4 0.053(5) 0.062(6) 0.030(4) 0.003(4) 0.003(4) -0.012(5)
O5 0.043(3) 0.043(3) 0.062(3) 0.003(3) 0.019(3) 0.019(3)
O6 0.062(3) 0.026(3) 0.038(3) 0.004(2) 0.005(2) -0.006(2)
O7 0.045(3) 0.034(3) 0.034(3) 0.004(2) 0.018(2) 0.011(2)
O8 0.037(3) 0.039(3) 0.025(2) 0.003(2) 0.008(2) 0.004(2)
C5 0.050(5) 0.072(6) 0.034(4) -0.024(4) 0.021(4) -0.015(5)
C6 0.038(4) 0.062(6) 0.035(4) -0.007(4) 0.020(3) -0.007(4)
C7 0.036(4) 0.026(4) 0.032(4) 0.006(3) 0.022(3) -0.002(3)
C8 0.027(4) 0.024(4) 0.043(4) 0.003(3) 0.016(3) 0.002(3)
C9 0.030(4) 0.039(5) 0.049(4) -0.003(4) 0.015(3) 0.002(3)
C10 0.033(4) 0.044(5) 0.049(5) -0.003(4) 0.006(3) -0.007(4)
C11 0.054(5) 0.030(5) 0.043(4) -0.010(4) 0.012(4) -0.008(4)
C12 0.047(5) 0.038(5) 0.041(4) -0.004(4) 0.019(4) 0.004(4)
C13 0.035(4) 0.019(4) 0.028(4) -0.006(3) 0.001(3) -0.005(3)
C14 0.034(4) 0.023(4) 0.024(3) -0.007(3) 0.008(3) 0.003(3)
C15 0.060(5) 0.027(4) 0.031(4) 0.000(3) 0.007(3) 0.006(4)
C16 0.092(7) 0.031(5) 0.045(5) 0.007(4) -0.023(5) 0.009(5)
C17 0.038(5) 0.057(6) 0.076(6) -0.037(5) -0.021(4) 0.034(4)
C18 0.027(4) 0.049(5) 0.062(5) -0.012(4) 0.004(4) 0.004(4)
C19 0.069(6) 0.052(6) 0.080(6) 0.021(5) 0.039(5) 0.010(5)
C20 0.051(5) 0.081(7) 0.041(5) 0.014(4) 0.012(4) 0.004(5)
 
_geom_special_details
;
  All esds (except the esd in the dihedral angle between two l.s. planes)
  are estimated using the full covariance matrix.  The cell esds are taken
  into account individually in the estimation of esds in distances, angles
  and torsion angles; correlations between esds in cell parameters are only
  used when they are defined by crystal symmetry.  An approximate (isotropic)
  treatment of cell esds is used for estimating esds involving l.s. planes.
;
 
loop_
  _geom_bond_atom_site_label_1
  _geom_bond_atom_site_label_2
  _geom_bond_distance
  _geom_bond_site_symmetry_2
  _geom_bond_publ_flag
La1 O4 2.403(5) 2_767 ?
La1 O5 2.443(5) . ?
La1 O6 2.456(4) 2_667 ?
La1 O3 2.535(4) . ?
La1 O7 2.561(4) . ?
La1 O2 2.590(4) . ?
La1 O1 2.601(4) . ?
La1 O8 2.594(4) . ?
La1 C1 2.938(6) . ?
Fe1 C3 2.023(6) . ?
Fe1 C8 2.025(6) . ?
Fe1 C5 2.027(7) . ?
Fe1 C6 2.030(7) . ?
Fe1 C11 2.034(7) . ?
Fe1 C10 2.037(6) . ?
Fe1 C12 2.036(6) . ?
Fe1 C9 2.037(7) . ?
Fe1 C2 2.044(6) . ?
Fe1 C4 2.044(6) . ?
Fe2 C15 2.019(6) 2_677 ?
Fe2 C15 2.019(6) . ?
Fe2 C17 2.018(7) . ?
Fe2 C17 2.018(7) 2_677 ?
Fe2 C14 2.027(6) . ?
Fe2 C14 2.027(6) 2_677 ?
Fe2 C16 2.027(7) . ?
Fe2 C16 2.027(7) 2_677 ?
Fe2 C18 2.034(7) . ?
Fe2 C18 2.034(7) 2_677 ?
O1 C1 1.280(7) . ?
O2 C1 1.256(7) . ?
O3 C7 1.248(7) . ?
O4 C7 1.260(7) . ?
O4 La1 2.403(5) 2_767 ?
C1 C2 1.473(8) . ?
C2 C3 1.412(8) . ?
C2 C6 1.415(9) . ?
C3 C4 1.408(9) . ?
C4 C5 1.365(10) . ?
O5 C13 1.247(7) . ?
O6 C13 1.272(7) . ?
O6 La1 2.456(4) 2_667 ?
O7 C19 1.424(7) . ?
O8 C20 1.412(6) . ?
C5 C6 1.414(8) . ?
C7 C8 1.497(8) . ?
C8 C9 1.407(8) . ?
C8 C12 1.414(9) . ?
C9 C10 1.412(9) . ?
C10 C11 1.394(9) . ?
C11 C12 1.432(8) . ?
C13 C14 1.456(8) . ?
C14 C18 1.418(9) . ?
C14 C15 1.426(8) . ?
C15 C16 1.386(10) . ?
C16 C17 1.391(10) . ?
C17 C18 1.422(10) . ?
 
loop_
  _geom_angle_atom_site_label_1
  _geom_angle_atom_site_label_2
  _geom_angle_atom_site_label_3
  _geom_angle
  _geom_angle_site_symmetry_1
  _geom_angle_site_symmetry_3
  _geom_angle_publ_flag
O4 La1 O5 144.35(15) 2_767 . ?
O4 La1 O6 91.03(16) 2_767 2_667 ?
O5 La1 O6 107.51(16) . 2_667 ?
O4 La1 O3 105.37(15) 2_767 . ?
O5 La1 O3 76.42(15) . . ?
O6 La1 O3 145.43(13) 2_667 . ?
O4 La1 O7 69.43(14) 2_767 . ?
O5 La1 O7 77.10(15) . . ?
O6 La1 O7 139.74(14) 2_667 . ?
O3 La1 O7 74.81(13) . . ?
O4 La1 O2 78.71(14) 2_767 . ?
O5 La1 O2 133.30(14) . . ?
O6 La1 O2 80.47(13) 2_667 . ?
O3 La1 O2 73.45(13) . . ?
O7 La1 O2 126.26(13) . . ?
O4 La1 O1 128.74(14) 2_767 . ?
O5 La1 O1 85.73(15) . . ?
O6 La1 O1 77.31(13) 2_667 . ?
O3 La1 O1 68.65(13) . . ?
O7 La1 O1 142.35(13) . . ?
O2 La1 O1 50.30(13) . . ?
O4 La1 O8 87.11(14) 2_767 . ?
O5 La1 O8 72.32(14) . . ?
O6 La1 O8 69.18(13) 2_667 . ?
O3 La1 O8 140.27(13) . . ?
O7 La1 O8 74.81(12) . . ?
O2 La1 O8 146.21(13) . . ?
O1 La1 O8 131.18(13) . . ?
O4 La1 C1 103.88(17) 2_767 . ?
O5 La1 C1 108.50(17) . . ?
O6 La1 C1 82.32(14) 2_667 . ?
O3 La1 C1 64.45(14) . . ?
O7 La1 C1 135.42(14) . . ?
O2 La1 C1 25.27(15) . . ?
O1 La1 C1 25.81(15) . . ?
O8 La1 C1 149.73(15) . . ?
C3 Fe1 C8 121.4(3) . . ?
C3 Fe1 C5 67.4(3) . . ?
C8 Fe1 C5 163.5(3) . . ?
C3 Fe1 C6 68.7(3) . . ?
C8 Fe1 C6 126.1(3) . . ?
C5 Fe1 C6 40.8(2) . . ?
C3 Fe1 C11 160.3(3) . . ?
C8 Fe1 C11 68.7(3) . . ?
C5 Fe1 C11 107.6(3) . . ?
C6 Fe1 C11 120.9(3) . . ?
C3 Fe1 C10 124.3(3) . . ?
C8 Fe1 C10 68.6(3) . . ?
C5 Fe1 C10 119.7(3) . . ?
C6 Fe1 C10 154.9(3) . . ?
C11 Fe1 C10 40.0(3) . . ?
C3 Fe1 C12 157.0(3) . . ?
C8 Fe1 C12 40.8(2) . . ?
C5 Fe1 C12 126.0(3) . . ?
C6 Fe1 C12 108.1(3) . . ?
C11 Fe1 C12 41.2(2) . . ?
C10 Fe1 C12 68.5(3) . . ?
C3 Fe1 C9 108.0(3) . . ?
C8 Fe1 C9 40.5(2) . . ?
C5 Fe1 C9 154.5(3) . . ?
C6 Fe1 C9 163.3(3) . . ?
C11 Fe1 C9 67.8(3) . . ?
C10 Fe1 C9 40.6(2) . . ?
C12 Fe1 C9 68.1(3) . . ?
C3 Fe1 C2 40.6(2) . . ?
C8 Fe1 C2 109.2(2) . . ?
C5 Fe1 C2 67.5(3) . . ?
C6 Fe1 C2 40.6(3) . . ?
C11 Fe1 C2 157.1(3) . . ?
C10 Fe1 C2 162.2(3) . . ?
C12 Fe1 C2 122.2(3) . . ?
C9 Fe1 C2 126.4(3) . . ?
C3 Fe1 C4 40.5(3) . . ?
C8 Fe1 C4 156.2(3) . . ?
C5 Fe1 C4 39.2(3) . . ?
C6 Fe1 C4 67.9(3) . . ?
C11 Fe1 C4 123.8(3) . . ?
C10 Fe1 C4 106.9(3) . . ?
C12 Fe1 C4 161.3(3) . . ?
C9 Fe1 C4 121.0(3) . . ?
C2 Fe1 C4 67.6(3) . . ?
C15 Fe2 C15 180.000(2) 2_677 . ?
C15 Fe2 C17 112.3(3) 2_677 . ?
C15 Fe2 C17 67.7(3) . . ?
C15 Fe2 C17 67.7(3) 2_677 2_677 ?
C15 Fe2 C17 112.3(3) . 2_677 ?
C17 Fe2 C17 180.000(3) . 2_677 ?
C15 Fe2 C14 138.7(2) 2_677 . ?
C15 Fe2 C14 41.3(2) . . ?
C17 Fe2 C14 68.6(3) . . ?
C17 Fe2 C14 111.4(3) 2_677 . ?
C15 Fe2 C14 41.3(2) 2_677 2_677 ?
C15 Fe2 C14 138.7(2) . 2_677 ?
C17 Fe2 C14 111.4(3) . 2_677 ?
C17 Fe2 C14 68.6(3) 2_677 2_677 ?
C14 Fe2 C14 180.0(2) . 2_677 ?
C15 Fe2 C16 139.9(3) 2_677 . ?
C15 Fe2 C16 40.1(3) . . ?
C17 Fe2 C16 40.2(3) . . ?
C17 Fe2 C16 139.8(3) 2_677 . ?
C14 Fe2 C16 68.7(3) . . ?
C14 Fe2 C16 111.3(3) 2_677 . ?
C15 Fe2 C16 40.1(3) 2_677 2_677 ?
C15 Fe2 C16 139.9(3) . 2_677 ?
C17 Fe2 C16 139.8(3) . 2_677 ?
C17 Fe2 C16 40.2(3) 2_677 2_677 ?
C14 Fe2 C16 111.3(3) . 2_677 ?
C14 Fe2 C16 68.7(3) 2_677 2_677 ?
C16 Fe2 C16 180.000(4) . 2_677 ?
C15 Fe2 C18 111.2(3) 2_677 . ?
C15 Fe2 C18 68.8(3) . . ?
C17 Fe2 C18 41.1(3) . . ?
C17 Fe2 C18 138.9(3) 2_677 . ?
C14 Fe2 C18 40.9(3) . . ?
C14 Fe2 C18 139.1(3) 2_677 . ?
C16 Fe2 C18 68.7(3) . . ?
C16 Fe2 C18 111.3(3) 2_677 . ?
C15 Fe2 C18 68.8(3) 2_677 2_677 ?
C15 Fe2 C18 111.2(3) . 2_677 ?
C17 Fe2 C18 138.9(3) . 2_677 ?
C17 Fe2 C18 41.1(3) 2_677 2_677 ?
C14 Fe2 C18 139.1(3) . 2_677 ?
C14 Fe2 C18 40.9(3) 2_677 2_677 ?
C16 Fe2 C18 111.3(3) . 2_677 ?
C16 Fe2 C18 68.7(3) 2_677 2_677 ?
C18 Fe2 C18 180.0(4) . 2_677 ?
C1 O1 La1 92.0(4) . . ?
C1 O2 La1 93.0(4) . . ?
C7 O3 La1 117.0(4) . . ?
C7 O4 La1 173.4(5) . 2_767 ?
O2 C1 O1 120.9(6) . . ?
O2 C1 C2 120.6(6) . . ?
O1 C1 C2 118.4(6) . . ?
O2 C1 La1 61.7(3) . . ?
O1 C1 La1 62.2(3) . . ?
C2 C1 La1 161.2(4) . . ?
C3 C2 C6 108.0(6) . . ?
C3 C2 C1 126.0(6) . . ?
C6 C2 C1 125.2(6) . . ?
C3 C2 Fe1 68.9(4) . . ?
C6 C2 Fe1 69.1(4) . . ?
C1 C2 Fe1 119.4(4) . . ?
C4 C3 C2 107.5(7) . . ?
C4 C3 Fe1 70.6(4) . . ?
C2 C3 Fe1 70.5(4) . . ?
C5 C4 C3 108.3(7) . . ?
C5 C4 Fe1 69.7(4) . . ?
C3 C4 Fe1 68.9(4) . . ?
C13 O5 La1 117.2(4) . . ?
C13 O6 La1 161.7(4) . 2_667 ?
C19 O7 La1 124.5(4) . . ?
C20 O8 La1 129.1(4) . . ?
C4 C5 C6 109.9(7) . . ?
C4 C5 Fe1 71.1(4) . . ?
C6 C5 Fe1 69.7(4) . . ?
C5 C6 C2 106.2(7) . . ?
C5 C6 Fe1 69.5(4) . . ?
C2 C6 Fe1 70.2(4) . . ?
O3 C7 O4 123.3(6) . . ?
O3 C7 C8 119.3(6) . . ?
O4 C7 C8 117.3(6) . . ?
C9 C8 C12 107.9(6) . . ?
C9 C8 C7 124.9(6) . . ?
C12 C8 C7 127.1(6) . . ?
C9 C8 Fe1 70.2(4) . . ?
C12 C8 Fe1 70.0(4) . . ?
C7 C8 Fe1 122.7(4) . . ?
C8 C9 C10 108.6(6) . . ?
C8 C9 Fe1 69.3(4) . . ?
C10 C9 Fe1 69.7(4) . . ?
C11 C10 C9 108.0(6) . . ?
C11 C10 Fe1 69.9(4) . . ?
C9 C10 Fe1 69.7(4) . . ?
C10 C11 C12 108.4(6) . . ?
C10 C11 Fe1 70.1(4) . . ?
C12 C11 Fe1 69.5(4) . . ?
C8 C12 C11 107.2(6) . . ?
C8 C12 Fe1 69.2(4) . . ?
C11 C12 Fe1 69.3(4) . . ?
O5 C13 O6 120.9(7) . . ?
O5 C13 C14 119.1(6) . . ?
O6 C13 C14 119.9(7) . . ?
C18 C14 C15 107.2(6) . . ?
C18 C14 C13 128.3(6) . . ?
C15 C14 C13 123.8(6) . . ?
C18 C14 Fe2 69.9(4) . . ?
C15 C14 Fe2 69.0(3) . . ?
C13 C14 Fe2 119.1(4) . . ?
C16 C15 C14 108.7(7) . . ?
C16 C15 Fe2 70.3(4) . . ?
C14 C15 Fe2 69.7(4) . . ?
C15 C16 C17 108.2(7) . . ?
C15 C16 Fe2 69.6(4) . . ?
C17 C16 Fe2 69.5(4) . . ?
C16 C17 C18 109.1(7) . . ?
C16 C17 Fe2 70.2(4) . . ?
C18 C17 Fe2 70.1(4) . . ?
C14 C18 C17 106.7(7) . . ?
C14 C18 Fe2 69.3(4) . . ?
C17 C18 Fe2 68.8(4) . . ?
 
_diffrn_measured_fraction_theta_max    0.983
_diffrn_reflns_theta_full              25.00
_diffrn_measured_fraction_theta_full   0.983
_refine_diff_density_max    0.893
_refine_diff_density_min   -0.693
_refine_diff_density_rms    0.147

#===END

data_compound_5
 
_audit_creation_method            SHELXL-97
_chemical_name_systematic
;
  ?
;
_chemical_name_common             ?
_chemical_melting_point           ?
_chemical_formula_moiety          ?
_chemical_formula_sum
  'C36 H34 Eu2 Fe3 O17'
_chemical_formula_weight          1210.10
 
loop_
  _atom_type_symbol
  _atom_type_description
  _atom_type_scat_dispersion_real
  _atom_type_scat_dispersion_imag
  _atom_type_scat_source
  'C'  'C'   0.0033   0.0016
  'International Tables Vol C Tables 4.2.6.8 and 6.1.1.4'
  'H'  'H'   0.0000   0.0000
  'International Tables Vol C Tables 4.2.6.8 and 6.1.1.4'
  'O'  'O'   0.0106   0.0060
  'International Tables Vol C Tables 4.2.6.8 and 6.1.1.4'
  'Fe'  'Fe'   0.3463   0.8444
  'International Tables Vol C Tables 4.2.6.8 and 6.1.1.4'
  'Eu'  'Eu'  -0.1578   3.6682
  'International Tables Vol C Tables 4.2.6.8 and 6.1.1.4'

_symmetry_cell_setting           'Monoclinic'
_symmetry_space_group_name_H-M   'P2/n  '

loop_
  _symmetry_equiv_pos_as_xyz
  'x, y, z'
  '-x+1/2, y, -z+1/2'
  '-x, -y, -z'
  'x-1/2, -y, z-1/2'
 
_cell_length_a                    11.219(2)
_cell_length_b                    10.270(3)
_cell_length_c                    17.088(6)
_cell_angle_alpha                 90.00
_cell_angle_beta                  91.46(3)
_cell_angle_gamma                 90.00
_cell_volume                      1968.2(10)
_cell_formula_units_Z             2
_cell_measurement_temperature     293(2)
_cell_measurement_reflns_used      37
_cell_measurement_theta_min        4.53
_cell_measurement_theta_max       10.02
 
_exptl_crystal_description        block
_exptl_crystal_colour             orange
_exptl_crystal_size_max           0.3
_exptl_crystal_size_mid           0.2
_exptl_crystal_size_min           0.2
_exptl_crystal_density_meas       ?
_exptl_crystal_density_diffrn     2.042
_exptl_crystal_density_method     'not measured'
_exptl_crystal_F_000              1180
_exptl_absorpt_coefficient_mu     4.294
__exptl_absorpt_correction_type   'empirical'
_exptl_absorpt_correction_T_min  0.269
_exptl_absorpt_correction_T_max  0.426
 
_exptl_special_details
;
  ?
;
 
_diffrn_ambient_temperature       293(2)
_diffrn_radiation_wavelength      0.71073
_diffrn_radiation_type            MoK\a
_diffrn_radiation_source          'fine-focus sealed tube'
_diffrn_radiation_monochromator   graphite
diffrn_measurement_device_type  'Bruker P4'
_diffrn_measurement_method       '2\q/\w scans'
_diffrn_standards_number            3
_diffrn_standards_interval_count   97
_diffrn_standards_decay_%        10.60
_diffrn_reflns_number             4537
_diffrn_reflns_av_R_equivalents   0.0696
_diffrn_reflns_av_sigmaI/netI     0.0807
_diffrn_reflns_limit_h_min        -1
_diffrn_reflns_limit_h_max        13
_diffrn_reflns_limit_k_min        -1
_diffrn_reflns_limit_k_max        12
_diffrn_reflns_limit_l_min        -20
_diffrn_reflns_limit_l_max        20
_diffrn_reflns_theta_min          1.98
_diffrn_reflns_theta_max          25.00
_reflns_number_total              3475
_reflns_number_gt                 2556
_reflns_threshold_expression      >2sigma(I)
 

_computing_data_collection      'Bruker XSCANS'
_computing_cell_refinement      'Bruker XSCANS'
_computing_data_reduction       'Bruker SHELXTL'
_computing_structure_solution   'Bruker SHELXTL'
_computing_structure_refinement 'Bruker SHELXTL'
_refine_special_details
;
  Refinement of F^2^ against ALL reflections.  The weighted R-factor wR and
  goodness of fit S are based on F^2^, conventional R-factors R are based
  on F, with F set to zero for negative F^2^. The threshold expression of
  F^2^ > 2sigma(F^2^) is used only for calculating R-factors(gt) etc. and is
  not relevant to the choice of reflections for refinement.  R-factors based
  on F^2^ are statistically about twice as large as those based on F, and R-
  factors based on ALL data will be even larger.
;
 
_refine_ls_structure_factor_coef  Fsqd
_refine_ls_matrix_type            full
_refine_ls_weighting_scheme       calc
_refine_ls_weighting_details
  'calc w=1/[\s^2^(Fo^2^)+(0.1263P)^2^+1.2497P] where P=(Fo^2^+2Fc^2^)/3'
_atom_sites_solution_primary      direct
_atom_sites_solution_secondary    difmap
_atom_sites_solution_hydrogens    geom
_refine_ls_hydrogen_treatment     mixed
_refine_ls_extinction_method      none
_refine_ls_extinction_coef        ?
_refine_ls_number_reflns          3475
_refine_ls_number_parameters      264
_refine_ls_number_restraints      0
_refine_ls_R_factor_all           0.1016
_refine_ls_R_factor_gt            0.0732
_refine_ls_wR_factor_ref          0.2043
_refine_ls_wR_factor_gt           0.1829
_refine_ls_goodness_of_fit_ref    1.081
_refine_ls_restrained_S_all       1.081
_refine_ls_shift/su_max           0.001
_refine_ls_shift/su_mean          0.000
 
loop_
  _atom_site_label
  _atom_site_type_symbol
  _atom_site_fract_x
  _atom_site_fract_y
  _atom_site_fract_z
  _atom_site_U_iso_or_equiv
  _atom_site_adp_type
  _atom_site_occupancy
  _atom_site_symmetry_multiplicity
  _atom_site_calc_flag
  _atom_site_refinement_flags
  _atom_site_disorder_assembly
  _atom_site_disorder_group
Eu1 Eu 0.56208(3) 0.47287(4) 0.617014(18) 0.03193(9) Uani 1 1 d . . .
Fe1 Fe 1.00852(8) 0.22299(10) 0.59893(6) 0.0370(3) Uani 1 1 d . . .
Fe2 Fe 0.5000 1.0000 0.5000 0.0354(4) Uani 1 2 d S . .
O1W O 0.3709(4) 0.5894(5) 0.6192(3) 0.0452(14) Uani 1 1 d . . .
O2W O 0.5811(4) 0.5731(6) 0.7463(3) 0.0490(15) Uani 1 1 d . . .
O1 O 0.7147(4) 0.3881(5) 0.5314(2) 0.0343(12) Uani 1 1 d . . .
O2 O 0.7829(4) 0.4851(5) 0.6366(3) 0.0452(14) Uani 1 1 d . . .
O3 O 0.8734(4) 0.2874(6) 0.8061(3) 0.0515(15) Uani 1 1 d . . .
O4 O 1.0651(4) 0.3405(6) 0.7986(3) 0.0495(15) Uani 1 1 d . . .
O5 O 0.5474(4) 0.6394(4) 0.4815(3) 0.0381(12) Uani 1 1 d . . .
O6 O 0.6181(5) 0.6973(5) 0.5991(3) 0.0533(15) Uani 1 1 d . . .
C1 C 0.8015(6) 0.4192(7) 0.5743(4) 0.0341(17) Uani 1 1 d . . .
C2 C 0.9237(5) 0.3805(7) 0.5542(3) 0.0310(16) Uani 1 1 d . . .
C3 C 0.9572(6) 0.2970(8) 0.4936(4) 0.043(2) Uani 1 1 d . . .
H3A H 0.9032 0.2554 0.4552 0.052 Uiso 1 1 calc R . .
C4 C 1.0773(7) 0.2861(9) 0.4967(4) 0.052(2) Uani 1 1 d . . .
H4A H 1.1233 0.2315 0.4615 0.063 Uiso 1 1 calc R . .
C5 C 1.1261(6) 0.3573(7) 0.5575(4) 0.043(2) Uani 1 1 d . . .
H5A H 1.2110 0.3645 0.5718 0.052 Uiso 1 1 calc R . .
C6 C 1.0322(6) 0.4179(7) 0.5946(4) 0.0360(18) Uani 1 1 d . . .
H6A H 1.0390 0.4768 0.6396 0.043 Uiso 1 1 calc R . .
C7 C 0.9741(7) 0.2729(8) 0.7761(4) 0.047(2) Uani 1 1 d . . .
C8 C 0.9879(6) 0.1719(7) 0.7110(4) 0.0379(18) Uani 1 1 d . . .
C9 C 1.0967(6) 0.1220(7) 0.6840(4) 0.0427(19) Uani 1 1 d . . .
H9A H 1.1763 0.1422 0.7056 0.051 Uiso 1 1 calc R . .
C10 C 1.0708(7) 0.0364(8) 0.6214(4) 0.050(2) Uani 1 1 d . . .
H10A H 1.1274 -0.0139 0.5909 0.059 Uiso 1 1 calc R . .
C11 C 0.9415(7) 0.0386(8) 0.6122(5) 0.049(2) Uani 1 1 d . . .
H11A H 0.8955 -0.0093 0.5721 0.059 Uiso 1 1 calc R . .
C12 C 0.8943(6) 0.1197(7) 0.6665(4) 0.042(2) Uani 1 1 d . . .
H12A H 0.8094 0.1380 0.6729 0.050 Uiso 1 1 calc R . .
C13 C 0.5932(5) 0.7191(7) 0.5286(4) 0.0371(18) Uani 1 1 d . . .
C14 C 0.6203(5) 0.8558(7) 0.5027(4) 0.0395(19) Uani 1 1 d . . .
C15 C 0.6100(7) 0.9065(9) 0.4271(4) 0.052(2) Uani 1 1 d . . .
H15A H 0.5849 0.8577 0.3802 0.062 Uiso 1 1 calc R . .
C16 C 0.6387(7) 1.0388(8) 0.4292(6) 0.060(3) Uani 1 1 d . . .
H16A H 0.6375 1.0986 0.3845 0.071 Uiso 1 1 calc R . .
C17 C 0.6701(6) 1.0724(8) 0.5111(5) 0.051(2) Uani 1 1 d . . .
H17A H 0.6938 1.1581 0.5314 0.061 Uiso 1 1 calc R . .
C18 C 0.6594(6) 0.9601(8) 0.5528(5) 0.046(2) Uani 1 1 d . . .
H18A H 0.6730 0.9526 0.6095 0.055 Uiso 1 1 calc R . .
O3W O 0.7500 0.5247(9) 0.2500 0.066(3) Uani 1 2 d S . .
 
loop_
  _atom_site_aniso_label
  _atom_site_aniso_U_11
  _atom_site_aniso_U_22
  _atom_site_aniso_U_33
  _atom_site_aniso_U_23
  _atom_site_aniso_U_13
  _atom_site_aniso_U_12
Eu1 0.02433(15) 0.03634(17) 0.03485(16) 0.00041(15) -0.00478(13) 0.00241(15)
Fe1 0.0253(4) 0.0410(5) 0.0445(5) -0.0040(5) -0.0032(4) 0.0022(4)
Fe2 0.0216(6) 0.0291(7) 0.0553(8) 0.0027(6) -0.0019(6) 0.0001(5)
O1W 0.039(3) 0.057(3) 0.039(2) 0.003(2) -0.008(2) -0.001(3)
O2W 0.042(3) 0.065(3) 0.039(2) -0.005(2) -0.007(2) 0.004(3)
O1 0.025(2) 0.046(3) 0.032(2) -0.008(2) -0.0035(18) 0.007(2)
O2 0.022(2) 0.066(3) 0.048(3) -0.008(2) -0.001(2) -0.001(2)
O3 0.037(2) 0.065(3) 0.053(3) -0.022(3) 0.014(2) -0.011(3)
O4 0.028(2) 0.066(3) 0.054(3) -0.011(3) -0.012(2) -0.008(3)
O5 0.030(2) 0.022(2) 0.062(3) -0.003(2) 0.006(2) 0.002(2)
O6 0.064(3) 0.050(3) 0.045(2) 0.006(2) -0.023(2) -0.009(3)
C1 0.032(3) 0.033(3) 0.037(3) 0.004(3) -0.004(3) 0.003(3)
C2 0.024(3) 0.037(3) 0.032(3) 0.003(3) 0.001(3) 0.005(3)
C3 0.039(3) 0.059(5) 0.032(3) 0.008(3) 0.003(3) -0.011(4)
C4 0.043(4) 0.066(5) 0.048(4) -0.008(4) 0.010(3) -0.002(4)
C5 0.023(3) 0.051(4) 0.057(4) 0.016(4) 0.005(3) -0.003(3)
C6 0.024(3) 0.030(3) 0.053(4) -0.003(3) -0.003(3) -0.005(3)
C7 0.050(4) 0.052(4) 0.040(3) -0.001(3) -0.010(3) 0.003(4)
C8 0.036(3) 0.048(4) 0.030(3) 0.000(3) 0.001(3) 0.007(3)
C9 0.031(3) 0.050(4) 0.047(4) 0.009(3) -0.007(3) 0.009(3)
C10 0.051(4) 0.035(4) 0.063(5) -0.007(4) -0.006(4) 0.001(4)
C11 0.042(4) 0.043(4) 0.061(4) 0.001(4) -0.012(4) 0.000(4)
C12 0.038(4) 0.039(4) 0.048(4) 0.001(3) 0.006(3) 0.000(3)
C13 0.018(3) 0.030(3) 0.064(4) 0.011(3) 0.005(3) 0.006(3)
C14 0.013(3) 0.043(4) 0.062(4) 0.004(3) 0.010(3) -0.002(3)
C15 0.044(4) 0.062(5) 0.050(4) 0.003(4) 0.012(3) -0.001(4)
C16 0.032(4) 0.044(4) 0.104(6) 0.019(5) 0.018(4) -0.001(4)
C17 0.023(3) 0.032(4) 0.097(6) 0.005(4) -0.002(4) 0.008(3)
C18 0.021(3) 0.052(4) 0.063(4) 0.002(4) -0.006(3) 0.002(3)
O3W 0.037(4) 0.088(6) 0.074(5) 0.000 0.000(4) 0.000
 
_geom_special_details
;
  All esds (except the esd in the dihedral angle between two l.s. planes)
  are estimated using the full covariance matrix.  The cell esds are taken
  into account individually in the estimation of esds in distances, angles
  and torsion angles; correlations between esds in cell parameters are only
  used when they are defined by crystal symmetry.  An approximate (isotropic)
  treatment of cell esds is used for estimating esds involving l.s. planes.
;
 
loop_
  _geom_bond_atom_site_label_1
  _geom_bond_atom_site_label_2
  _geom_bond_distance
  _geom_bond_site_symmetry_2
  _geom_bond_publ_flag
Eu1 O5 2.360(5) 3_666 ?
Eu1 O6 2.410(6) . ?
Eu1 O3 2.414(5) 2_656 ?
Eu1 O1 2.441(4) . ?
Eu1 O2W 2.442(5) . ?
Eu1 O1W 2.458(5) . ?
Eu1 O4 2.463(5) 2_656 ?
Eu1 O2 2.495(5) . ?
Eu1 C7 2.785(8) 2_656 ?
Eu1 C1 2.855(7) . ?
Eu1 O5 2.880(5) . ?
Eu1 C13 2.971(7) . ?
Fe1 C8 2.005(6) . ?
Fe1 C2 2.017(6) . ?
Fe1 C6 2.021(7) . ?
Fe1 C9 2.023(7) . ?
Fe1 C3 2.024(7) . ?
Fe1 C4 2.033(8) . ?
Fe1 C12 2.044(7) . ?
Fe1 C5 2.047(7) . ?
Fe1 C11 2.052(8) . ?
Fe1 C10 2.072(8) . ?
Fe2 C14 2.003(7) 3_676 ?
Fe2 C14 2.003(7) . ?
Fe2 C15 2.019(8) 3_676 ?
Fe2 C15 2.019(8) . ?
Fe2 C18 2.025(7) 3_676 ?
Fe2 C18 2.025(7) . ?
Fe2 C16 2.035(8) 3_676 ?
Fe2 C16 2.035(9) . ?
Fe2 C17 2.052(7) 3_676 ?
Fe2 C17 2.052(7) . ?
O1 C1 1.245(8) . ?
O2 C1 1.282(8) . ?
O3 C7 1.261(9) . ?
O3 Eu1 2.414(5) 2_656 ?
O4 C7 1.285(9) . ?
O4 Eu1 2.463(5) 2_656 ?
O5 C13 1.249(8) . ?
O5 Eu1 2.360(5) 3_666 ?
O6 C13 1.250(8) . ?
C1 C2 1.477(9) . ?
C2 C3 1.403(9) . ?
C2 C6 1.436(9) . ?
C3 C4 1.351(11) . ?
C3 H3A 0.9800 . ?
C4 C5 1.373(10) . ?
C4 H4A 0.9800 . ?
C5 C6 1.390(10) . ?
C5 H5A 0.9800 . ?
C6 H6A 0.9800 . ?
C7 C8 1.531(10) . ?
C7 Eu1 2.785(8) 2_656 ?
C8 C12 1.388(10) . ?
C8 C9 1.412(10) . ?
C9 C10 1.408(10) . ?
C9 H9A 0.9800 . ?
C10 C11 1.454(11) . ?
C10 H10A 0.9800 . ?
C11 C12 1.364(11) . ?
C11 H11A 0.9800 . ?
C12 H12A 0.9800 . ?
C13 C14 1.505(10) . ?
C14 C15 1.396(10) . ?
C14 C18 1.433(11) . ?
C15 C16 1.396(12) . ?
C15 H15A 0.9800 . ?
C16 C17 1.475(13) . ?
C16 H16A 0.9800 . ?
C17 C18 1.363(11) . ?
C17 H17A 0.9800 . ?
C18 H18A 0.9800 . ?
 
loop_
  _geom_angle_atom_site_label_1
  _geom_angle_atom_site_label_2
  _geom_angle_atom_site_label_3
  _geom_angle
  _geom_angle_site_symmetry_1
  _geom_angle_site_symmetry_3
  _geom_angle_publ_flag
O5 Eu1 O6 120.62(16) 3_666 . ?
O5 Eu1 O3 98.39(17) 3_666 2_656 ?
O6 Eu1 O3 138.41(17) . 2_656 ?
O5 Eu1 O1 76.04(15) 3_666 . ?
O6 Eu1 O1 94.34(17) . . ?
O3 Eu1 O1 80.76(16) 2_656 . ?
O5 Eu1 O2W 152.05(17) 3_666 . ?
O6 Eu1 O2W 72.22(18) . . ?
O3 Eu1 O2W 79.78(18) 2_656 . ?
O1 Eu1 O2W 130.25(15) . . ?
O5 Eu1 O1W 79.04(16) 3_666 . ?
O6 Eu1 O1W 76.52(18) . . ?
O3 Eu1 O1W 128.73(17) 2_656 . ?
O1 Eu1 O1W 143.98(14) . . ?
O2W Eu1 O1W 80.62(16) . . ?
O5 Eu1 O4 81.33(16) 3_666 2_656 ?
O6 Eu1 O4 139.35(18) . 2_656 ?
O3 Eu1 O4 54.28(16) 2_656 2_656 ?
O1 Eu1 O4 125.44(17) . 2_656 ?
O2W Eu1 O4 75.01(18) . 2_656 ?
O1W Eu1 O4 74.99(17) . 2_656 ?
O5 Eu1 O2 128.12(16) 3_666 . ?
O6 Eu1 O2 73.00(18) . . ?
O3 Eu1 O2 71.57(17) 2_656 . ?
O1 Eu1 O2 52.30(15) . . ?
O2W Eu1 O2 78.13(17) . . ?
O1W Eu1 O2 146.91(18) . . ?
O4 Eu1 O2 122.50(16) 2_656 . ?
O5 Eu1 C7 91.49(19) 3_666 2_656 ?
O6 Eu1 C7 146.19(19) . 2_656 ?
O3 Eu1 C7 26.9(2) 2_656 2_656 ?
O1 Eu1 C7 104.3(2) . 2_656 ?
O2W Eu1 C7 74.2(2) . 2_656 ?
O1W Eu1 C7 102.0(2) . 2_656 ?
O4 Eu1 C7 27.5(2) 2_656 2_656 ?
O2 Eu1 C7 96.3(2) . 2_656 ?
O5 Eu1 C1 101.51(17) 3_666 . ?
O6 Eu1 C1 84.4(2) . . ?
O3 Eu1 C1 73.47(18) 2_656 . ?
O1 Eu1 C1 25.70(16) . . ?
O2W Eu1 C1 104.58(18) . . ?
O1W Eu1 C1 157.71(18) . . ?
O4 Eu1 C1 127.27(18) 2_656 . ?
O2 Eu1 C1 26.65(17) . . ?
C7 Eu1 C1 100.3(2) 2_656 . ?
O5 Eu1 O5 72.45(16) 3_666 . ?
O6 Eu1 O5 48.70(14) . . ?
O3 Eu1 O5 156.35(15) 2_656 . ?
O1 Eu1 O5 75.90(14) . . ?
O2W Eu1 O5 118.62(17) . . ?
O1W Eu1 O5 72.01(15) . . ?
O4 Eu1 O5 140.93(14) 2_656 . ?
O2 Eu1 O5 96.54(15) . . ?
C7 Eu1 O5 163.53(18) 2_656 . ?
C1 Eu1 O5 86.80(16) . . ?
O5 Eu1 C13 96.82(18) 3_666 . ?
O6 Eu1 C13 24.11(17) . . ?
O3 Eu1 C13 155.61(17) 2_656 . ?
O1 Eu1 C13 84.57(17) . . ?
O2W Eu1 C13 95.3(2) . . ?
O1W Eu1 C13 72.97(17) . . ?
O4 Eu1 C13 147.65(17) 2_656 . ?
O2 Eu1 C13 84.04(17) . . ?
C7 Eu1 C13 169.2(2) 2_656 . ?
C1 Eu1 C13 84.90(18) . . ?
O5 Eu1 C13 24.59(16) . . ?
C8 Fe1 C2 120.5(3) . . ?
C8 Fe1 C6 108.2(3) . . ?
C2 Fe1 C6 41.7(3) . . ?
C8 Fe1 C9 41.1(3) . . ?
C2 Fe1 C9 154.2(3) . . ?
C6 Fe1 C9 118.1(3) . . ?
C8 Fe1 C3 155.6(3) . . ?
C2 Fe1 C3 40.6(3) . . ?
C6 Fe1 C3 68.3(3) . . ?
C9 Fe1 C3 162.6(3) . . ?
C8 Fe1 C4 163.6(3) . . ?
C2 Fe1 C4 66.7(3) . . ?
C6 Fe1 C4 66.4(3) . . ?
C9 Fe1 C4 126.2(3) . . ?
C3 Fe1 C4 38.9(3) . . ?
C8 Fe1 C12 40.1(3) . . ?
C2 Fe1 C12 109.5(3) . . ?
C6 Fe1 C12 128.3(3) . . ?
C9 Fe1 C12 68.3(3) . . ?
C3 Fe1 C12 122.0(3) . . ?
C4 Fe1 C12 155.2(3) . . ?
C8 Fe1 C5 126.7(3) . . ?
C2 Fe1 C5 68.3(3) . . ?
C6 Fe1 C5 39.9(3) . . ?
C9 Fe1 C5 106.6(3) . . ?
C3 Fe1 C5 67.1(3) . . ?
C4 Fe1 C5 39.3(3) . . ?
C12 Fe1 C5 164.5(3) . . ?
C8 Fe1 C11 66.5(3) . . ?
C2 Fe1 C11 127.7(3) . . ?
C6 Fe1 C11 165.2(3) . . ?
C9 Fe1 C11 67.7(3) . . ?
C3 Fe1 C11 110.4(3) . . ?
C4 Fe1 C11 122.5(3) . . ?
C12 Fe1 C11 38.9(3) . . ?
C5 Fe1 C11 154.3(3) . . ?
C8 Fe1 C10 68.1(3) . . ?
C2 Fe1 C10 164.9(3) . . ?
C6 Fe1 C10 151.5(3) . . ?
C9 Fe1 C10 40.2(3) . . ?
C3 Fe1 C10 126.8(3) . . ?
C4 Fe1 C10 108.7(3) . . ?
C12 Fe1 C10 68.2(3) . . ?
C5 Fe1 C10 118.0(3) . . ?
C11 Fe1 C10 41.3(3) . . ?
C14 Fe2 C14 180.0(4) 3_676 . ?
C14 Fe2 C15 40.6(3) 3_676 3_676 ?
C14 Fe2 C15 139.4(3) . 3_676 ?
C14 Fe2 C15 139.4(3) 3_676 . ?
C14 Fe2 C15 40.6(3) . . ?
C15 Fe2 C15 180.000(2) 3_676 . ?
C14 Fe2 C18 41.7(3) 3_676 3_676 ?
C14 Fe2 C18 138.3(3) . 3_676 ?
C15 Fe2 C18 68.4(3) 3_676 3_676 ?
C15 Fe2 C18 111.6(3) . 3_676 ?
C14 Fe2 C18 138.3(3) 3_676 . ?
C14 Fe2 C18 41.7(3) . . ?
C15 Fe2 C18 111.6(3) 3_676 . ?
C15 Fe2 C18 68.4(3) . . ?
C18 Fe2 C18 180.000(1) 3_676 . ?
C14 Fe2 C16 68.5(3) 3_676 3_676 ?
C14 Fe2 C16 111.5(3) . 3_676 ?
C15 Fe2 C16 40.3(3) 3_676 3_676 ?
C15 Fe2 C16 139.7(3) . 3_676 ?
C18 Fe2 C16 67.9(3) 3_676 3_676 ?
C18 Fe2 C16 112.1(3) . 3_676 ?
C14 Fe2 C16 111.5(3) 3_676 . ?
C14 Fe2 C16 68.5(3) . . ?
C15 Fe2 C16 139.7(3) 3_676 . ?
C15 Fe2 C16 40.3(3) . . ?
C18 Fe2 C16 112.1(3) 3_676 . ?
C18 Fe2 C16 67.9(3) . . ?
C16 Fe2 C16 180.000(1) 3_676 . ?
C14 Fe2 C17 69.0(3) 3_676 3_676 ?
C14 Fe2 C17 111.0(3) . 3_676 ?
C15 Fe2 C17 69.4(3) 3_676 3_676 ?
C15 Fe2 C17 110.6(3) . 3_676 ?
C18 Fe2 C17 39.1(3) 3_676 3_676 ?
C18 Fe2 C17 140.9(3) . 3_676 ?
C16 Fe2 C17 42.3(4) 3_676 3_676 ?
C16 Fe2 C17 137.7(4) . 3_676 ?
C14 Fe2 C17 111.0(3) 3_676 . ?
C14 Fe2 C17 69.0(3) . . ?
C15 Fe2 C17 110.6(3) 3_676 . ?
C15 Fe2 C17 69.4(3) . . ?
C18 Fe2 C17 140.9(3) 3_676 . ?
C18 Fe2 C17 39.1(3) . . ?
C16 Fe2 C17 137.7(4) 3_676 . ?
C16 Fe2 C17 42.3(4) . . ?
C17 Fe2 C17 180.00(14) 3_676 . ?
C1 O1 Eu1 96.1(4) . . ?
C1 O2 Eu1 92.5(4) . . ?
C7 O3 Eu1 93.2(4) . 2_656 ?
C7 O4 Eu1 90.4(4) . 2_656 ?
C13 O5 Eu1 167.9(4) . 3_666 ?
C13 O5 Eu1 81.8(4) . . ?
Eu1 O5 Eu1 107.55(16) 3_666 . ?
C13 O6 Eu1 103.9(4) . . ?
O1 C1 O2 118.9(6) . . ?
O1 C1 C2 120.7(6) . . ?
O2 C1 C2 120.4(6) . . ?
O1 C1 Eu1 58.2(3) . . ?
O2 C1 Eu1 60.8(3) . . ?
C2 C1 Eu1 175.4(5) . . ?
C3 C2 C6 106.2(6) . . ?
C3 C2 C1 127.1(6) . . ?
C6 C2 C1 126.7(6) . . ?
C3 C2 Fe1 70.0(4) . . ?
C6 C2 Fe1 69.3(4) . . ?
C1 C2 Fe1 124.0(5) . . ?
C4 C3 C2 107.9(6) . . ?
C4 C3 Fe1 70.9(4) . . ?
C2 C3 Fe1 69.4(4) . . ?
C4 C3 H3A 126.1 . . ?
C2 C3 H3A 126.1 . . ?
Fe1 C3 H3A 126.1 . . ?
C3 C4 C5 111.3(7) . . ?
C3 C4 Fe1 70.2(4) . . ?
C5 C4 Fe1 70.9(4) . . ?
C3 C4 H4A 124.3 . . ?
C5 C4 H4A 124.3 . . ?
Fe1 C4 H4A 124.3 . . ?
C4 C5 C6 106.9(6) . . ?
C4 C5 Fe1 69.8(4) . . ?
C6 C5 Fe1 69.0(4) . . ?
C4 C5 H5A 126.5 . . ?
C6 C5 H5A 126.5 . . ?
Fe1 C5 H5A 126.5 . . ?
C5 C6 C2 107.7(6) . . ?
C5 C6 Fe1 71.1(4) . . ?
C2 C6 Fe1 69.0(4) . . ?
C5 C6 H6A 126.1 . . ?
C2 C6 H6A 126.1 . . ?
Fe1 C6 H6A 126.1 . . ?
O3 C7 O4 121.8(7) . . ?
O3 C7 C8 118.9(7) . . ?
O4 C7 C8 119.3(7) . . ?
O3 C7 Eu1 59.9(4) . 2_656 ?
O4 C7 Eu1 62.2(4) . 2_656 ?
C8 C7 Eu1 174.2(5) . 2_656 ?
C12 C8 C9 109.2(6) . . ?
C12 C8 C7 124.7(6) . . ?
C9 C8 C7 126.0(6) . . ?
C12 C8 Fe1 71.5(4) . . ?
C9 C8 Fe1 70.2(4) . . ?
C7 C8 Fe1 122.2(5) . . ?
C10 C9 C8 108.1(6) . . ?
C10 C9 Fe1 71.8(4) . . ?
C8 C9 Fe1 68.8(4) . . ?
C10 C9 H9A 125.9 . . ?
C8 C9 H9A 125.9 . . ?
Fe1 C9 H9A 125.9 . . ?
C9 C10 C11 105.0(7) . . ?
C9 C10 Fe1 68.0(4) . . ?
C11 C10 Fe1 68.6(4) . . ?
C9 C10 H10A 127.5 . . ?
C11 C10 H10A 127.5 . . ?
Fe1 C10 H10A 127.5 . . ?
C12 C11 C10 109.8(7) . . ?
C12 C11 Fe1 70.2(4) . . ?
C10 C11 Fe1 70.1(4) . . ?
C12 C11 H11A 125.1 . . ?
C10 C11 H11A 125.1 . . ?
Fe1 C11 H11A 125.1 . . ?
C11 C12 C8 107.8(7) . . ?
C11 C12 Fe1 70.9(4) . . ?
C8 C12 Fe1 68.4(4) . . ?
C11 C12 H12A 126.1 . . ?
C8 C12 H12A 126.1 . . ?
Fe1 C12 H12A 126.1 . . ?
O5 C13 O6 125.5(6) . . ?
O5 C13 C14 120.3(6) . . ?
O6 C13 C14 114.1(6) . . ?
O5 C13 Eu1 73.6(4) . . ?
O6 C13 Eu1 51.9(4) . . ?
C14 C13 Eu1 166.1(5) . . ?
C15 C14 C18 106.9(7) . . ?
C15 C14 C13 127.4(7) . . ?
C18 C14 C13 125.6(7) . . ?
C15 C14 Fe2 70.3(4) . . ?
C18 C14 Fe2 70.0(4) . . ?
C13 C14 Fe2 123.8(4) . . ?
C14 C15 C16 109.0(7) . . ?
C14 C15 Fe2 69.1(4) . . ?
C16 C15 Fe2 70.5(5) . . ?
C14 C15 H15A 125.5 . . ?
C16 C15 H15A 125.5 . . ?
Fe2 C15 H15A 125.5 . . ?
C15 C16 C17 107.6(7) . . ?
C15 C16 Fe2 69.2(5) . . ?
C17 C16 Fe2 69.5(5) . . ?
C15 C16 H16A 126.2 . . ?
C17 C16 H16A 126.2 . . ?
Fe2 C16 H16A 126.2 . . ?
C18 C17 C16 106.0(7) . . ?
C18 C17 Fe2 69.4(4) . . ?
C16 C17 Fe2 68.2(4) . . ?
C18 C17 H17A 127.0 . . ?
C16 C17 H17A 127.0 . . ?
Fe2 C17 H17A 127.0 . . ?
C17 C18 C14 110.5(7) . . ?
C17 C18 Fe2 71.6(4) . . ?
C14 C18 Fe2 68.4(4) . . ?
C17 C18 H18A 124.7 . . ?
C14 C18 H18A 124.7 . . ?
Fe2 C18 H18A 124.7 . . ?
 
_diffrn_measured_fraction_theta_max    1.000
_diffrn_reflns_theta_full              25.00
_diffrn_measured_fraction_theta_full   1.000

_refine_diff_density_max    2.585
_refine_diff_density_min   -2.722
_refine_diff_density_rms    0.331

#===END

data_compound_6
 
_audit_creation_method            SHELXL-97
_chemical_name_systematic
;
  ?
;
_chemical_name_common             ?
_chemical_melting_point           ?
_chemical_formula_moiety          ?
_chemical_formula_sum
  'C38 H38 Fe3 Gd2 O17'
_chemical_formula_weight          1248.73
 
loop_
  _atom_type_symbol
  _atom_type_description
  _atom_type_scat_dispersion_real
  _atom_type_scat_dispersion_imag
  _atom_type_scat_source
  'C'  'C'   0.0033   0.0016
  'International Tables Vol C Tables 4.2.6.8 and 6.1.1.4'
  'H'  'H'   0.0000   0.0000
  'International Tables Vol C Tables 4.2.6.8 and 6.1.1.4'
  'O'  'O'   0.0106   0.0060
  'International Tables Vol C Tables 4.2.6.8 and 6.1.1.4'
  'Fe'  'Fe'   0.3463   0.8444
  'International Tables Vol C Tables 4.2.6.8 and 6.1.1.4'
  'Gd'  'Gd'  -0.1653   3.9035
  'International Tables Vol C Tables 4.2.6.8 and 6.1.1.4'
 
_symmetry_cell_setting           'Monoclinic'
_symmetry_space_group_name_H-M   'P2/n  '
 
loop_
  _symmetry_equiv_pos_as_xyz
  'x, y, z'
  '-x+1/2, y, -z+1/2'
  '-x, -y, -z'
  'x-1/2, -y, z-1/2'
 
_cell_length_a                    11.2591(12)
_cell_length_b                    10.2630(11)
_cell_length_c                    17.2307(18)
_cell_angle_alpha                 90.00
_cell_angle_beta                  91.905(2)
_cell_angle_gamma                 90.00
_cell_volume                      1989.9(4)
_cell_formula_units_Z             2
_cell_measurement_temperature     293(2)
_cell_measurement_reflns_used     3890
_cell_measurement_theta_min       2.19
_cell_measurement_theta_max       26.36
 
_exptl_crystal_description        block
_exptl_crystal_colour             pale-yellow
_exptl_crystal_size_max           0.40
_exptl_crystal_size_mid           0.30
_exptl_crystal_size_min           0.20
_exptl_crystal_density_meas       ?
_exptl_crystal_density_diffrn     2.084
_exptl_crystal_density_method     'not measured'
_exptl_crystal_F_000              1216
_exptl_absorpt_coefficient_mu     4.431
_exptl_absorpt_correction_type   'empirical'
_exptl_absorpt_correction_T_min  0.1631
_exptl_absorpt_correction_T_max  0.3619
_exptl_absorpt_process_details    SADABS
 
_exptl_special_details
;
  ?
;
 
_diffrn_ambient_temperature       293(2)
_diffrn_radiation_wavelength      0.71073
_diffrn_radiation_type            MoK\a
_diffrn_radiation_source          'fine-focus sealed tube'
_diffrn_radiation_monochromator   graphite
_diffrn_measurement_device_type  'CCD area detector'
_diffrn_measurement_method       'phi and omega scans'
_diffrn_reflns_number             11587
_diffrn_reflns_av_R_equivalents   0.0525
_diffrn_reflns_av_sigmaI/netI     0.0631
_diffrn_reflns_limit_h_min        -14
_diffrn_reflns_limit_h_max        14
_diffrn_reflns_limit_k_min        -12
_diffrn_reflns_limit_k_max        13
_diffrn_reflns_limit_l_min        -22
_diffrn_reflns_limit_l_max        14
_diffrn_reflns_theta_min          1.98
_diffrn_reflns_theta_max          28.01
_reflns_number_total              4467
_reflns_number_gt                 3314
_reflns_threshold_expression      >2sigma(I)
 
_computing_data_collection      'Bruker SMART'
_computing_cell_refinement      'Bruker SMART'
_computing_data_reduction       'Bruker SAINT'
_computing_structure_solution   'Bruker SHELXTL'
_computing_structure_refinement 'Bruker SHELXTL'
_computing_molecular_graphics   'Bruker SHELXTL'
_computing_publication_material 'Bruker SHELXTL'
 
_refine_special_details
;
  Refinement of F^2^ against ALL reflections.  The weighted R-factor wR and
  goodness of fit S are based on F^2^, conventional R-factors R are based
  on F, with F set to zero for negative F^2^. The threshold expression of
  F^2^ > 2sigma(F^2^) is used only for calculating R-factors(gt) etc. and is
  not relevant to the choice of reflections for refinement.  R-factors based
  on F^2^ are statistically about twice as large as those based on F, and R-
  factors based on ALL data will be even larger.
;
 
_refine_ls_structure_factor_coef  Fsqd
_refine_ls_matrix_type            full
_refine_ls_weighting_scheme       calc
_refine_ls_weighting_details
  'calc w=1/[\s^2^(Fo^2^)+(0.0650P)^2^+0.0000P] where P=(Fo^2^+2Fc^2^)/3'
_atom_sites_solution_primary      direct
_atom_sites_solution_secondary    difmap
_atom_sites_solution_hydrogens    geom
_refine_ls_hydrogen_treatment     mixed
_refine_ls_extinction_method      none
_refine_ls_extinction_coef        ?
_refine_ls_number_reflns          4467
_refine_ls_number_parameters      273
_refine_ls_number_restraints      0
_refine_ls_R_factor_all           0.0599
_refine_ls_R_factor_gt            0.0448
_refine_ls_wR_factor_ref          0.1203
_refine_ls_wR_factor_gt           0.1161
_refine_ls_goodness_of_fit_ref    1.025
_refine_ls_restrained_S_all       1.025
_refine_ls_shift/su_max           0.002
_refine_ls_shift/su_mean          0.000
 
loop_
  _atom_site_label
  _atom_site_type_symbol
  _atom_site_fract_x
  _atom_site_fract_y
  _atom_site_fract_z
  _atom_site_U_iso_or_equiv
  _atom_site_adp_type
  _atom_site_occupancy
  _atom_site_symmetry_multiplicity
  _atom_site_calc_flag
  _atom_site_refinement_flags
  _atom_site_disorder_assembly
  _atom_site_disorder_group
Gd1 Gd 0.06265(3) 0.47245(3) 0.118334(19) 0.03078(13) Uani 1 1 d . . .
Fe1 Fe 0.50829(8) 0.22342(10) 0.09992(6) 0.0393(3) Uani 1 1 d . . .
Fe2 Fe 0.0000 0.0000 0.0000 0.0342(3) Uani 1 2 d S . .
O2W O -0.1279(4) 0.5898(5) 0.1168(3) 0.0432(12) Uani 1 1 d . . .
O1 O 0.2124(3) 0.3891(4) 0.0332(3) 0.0330(10) Uani 1 1 d . . .
O2 O 0.2836(4) 0.4829(5) 0.1381(3) 0.0364(11) Uani 1 1 d . . .
O3 O 0.3746(4) 0.2873(5) 0.3056(3) 0.0501(13) Uani 1 1 d . . .
O4 O 0.5657(4) 0.3403(5) 0.2983(3) 0.0475(13) Uani 1 1 d . . .
O5 O -0.1187(4) 0.3090(5) -0.0946(3) 0.0526(14) Uani 1 1 d . . .
O6 O -0.0468(4) 0.3615(5) 0.0208(3) 0.0432(12) Uani 1 1 d . . .
C1 C 0.2997(5) 0.4203(6) 0.0768(4) 0.0302(14) Uani 1 1 d . . .
C2 C 0.4217(5) 0.3814(6) 0.0558(4) 0.0327(15) Uani 1 1 d . . .
C3 C 0.4532(6) 0.2974(7) -0.0052(4) 0.0399(16) Uani 1 1 d . . .
H3A H 0.3978 0.2554 -0.0425 0.048 Uiso 1 1 calc R . .
C4 C 0.5763(6) 0.2852(8) -0.0034(5) 0.050(2) Uani 1 1 d . . .
H4A H 0.6222 0.2316 -0.0387 0.060 Uiso 1 1 calc R . .
C5 C 0.6236(5) 0.3593(7) 0.0587(4) 0.0413(17) Uani 1 1 d . . .
H5A H 0.7080 0.3673 0.0737 0.050 Uiso 1 1 calc R . .
C6 C 0.5300(6) 0.4187(7) 0.0956(4) 0.0374(15) Uani 1 1 d . . .
H6A H 0.5371 0.4774 0.1404 0.045 Uiso 1 1 calc R . .
C7 C 0.4747(6) 0.2731(8) 0.2748(5) 0.0459(18) Uani 1 1 d . . .
C8 C 0.4891(6) 0.1736(7) 0.2133(4) 0.0398(16) Uani 1 1 d . . .
C9 C 0.5979(6) 0.1246(8) 0.1845(4) 0.0485(19) Uani 1 1 d . . .
H9A H 0.6778 0.1453 0.2053 0.058 Uiso 1 1 calc R . .
O7 O 0.0815(4) 0.5748(6) 0.2436(3) 0.0477(13) Uani 1 1 d . . .
H7A H 0.1102 0.5225 0.2841 0.057 Uiso 1 1 calc R . .
C10 C 0.5710(7) 0.0398(8) 0.1237(5) 0.056(2) Uani 1 1 d . . .
H10A H 0.6286 -0.0084 0.0934 0.067 Uiso 1 1 calc R . .
C11 C 0.4446(7) 0.0381(7) 0.1114(5) 0.052(2) Uani 1 1 d . . .
H11A H 0.4009 -0.0115 0.0711 0.062 Uiso 1 1 calc R . .
C12 C 0.3938(6) 0.1205(7) 0.1668(4) 0.0444(17) Uani 1 1 d . . .
H12A H 0.3089 0.1379 0.1724 0.053 Uiso 1 1 calc R . .
C13 C -0.0931(5) 0.2802(6) -0.0248(5) 0.0374(16) Uani 1 1 d . . .
C14 C -0.1211(5) 0.1450(6) -0.0010(4) 0.0350(15) Uani 1 1 d . . .
C15 C -0.1101(6) 0.0903(8) 0.0737(5) 0.0473(19) Uani 1 1 d . . .
H15A H -0.0853 0.1369 0.1211 0.057 Uiso 1 1 calc R . .
C16 C -0.1395(7) -0.0425(8) 0.0688(6) 0.060(3) Uani 1 1 d . . .
H16A H -0.1381 -0.1045 0.1121 0.072 Uiso 1 1 calc R . .
C17 C -0.1703(6) -0.0720(8) -0.0103(7) 0.062(3) Uani 1 1 d . . .
H17A H -0.1937 -0.1575 -0.0310 0.075 Uiso 1 1 calc R . .
C18 C -0.1596(6) 0.0449(7) -0.0535(5) 0.048(2) Uani 1 1 d . . .
H18A H -0.1748 0.0548 -0.1096 0.058 Uiso 1 1 calc R . .
C19 C 0.0510(19) 0.720(2) 0.2653(9) 0.239(13) Uani 1 1 d . . .
H19A H 0.0661 0.7329 0.3199 0.359 Uiso 1 1 calc R . .
H19B H -0.0312 0.7367 0.2528 0.359 Uiso 1 1 calc R . .
H19C H 0.0997 0.7780 0.2365 0.359 Uiso 1 1 calc R . .
O1W O 0.7500 0.4802(9) 0.2500 0.068(2) Uani 1 2 d S . .
 
loop_
  _atom_site_aniso_label
  _atom_site_aniso_U_11
  _atom_site_aniso_U_22
  _atom_site_aniso_U_33
  _atom_site_aniso_U_23
  _atom_site_aniso_U_13
  _atom_site_aniso_U_12
Gd1 0.02895(17) 0.02740(19) 0.0354(2) -0.00119(15) -0.00752(13) 0.00229(13)
Fe1 0.0327(5) 0.0363(6) 0.0484(7) -0.0039(5) -0.0057(4) 0.0030(4)
Fe2 0.0272(6) 0.0193(7) 0.0555(10) 0.0032(6) -0.0056(6) -0.0009(5)
O2W 0.041(2) 0.046(3) 0.042(3) -0.001(2) -0.006(2) 0.009(2)
O1 0.028(2) 0.034(3) 0.036(3) -0.004(2) -0.0114(19) 0.0021(19)
O2 0.032(2) 0.037(3) 0.040(3) -0.007(2) -0.004(2) -0.0010(19)
O3 0.043(3) 0.049(3) 0.059(4) -0.014(3) 0.006(2) -0.003(2)
O4 0.038(2) 0.052(3) 0.053(3) -0.012(3) -0.004(2) -0.010(2)
O5 0.056(3) 0.040(3) 0.060(4) 0.011(3) -0.018(3) -0.003(3)
O6 0.035(2) 0.031(3) 0.063(3) -0.010(2) -0.008(2) -0.002(2)
C1 0.035(3) 0.021(3) 0.034(4) 0.003(3) -0.008(3) 0.002(3)
C2 0.028(3) 0.033(4) 0.036(4) 0.001(3) -0.009(3) 0.004(3)
C3 0.042(3) 0.043(4) 0.034(4) -0.005(3) -0.007(3) 0.001(3)
C4 0.046(4) 0.051(5) 0.054(5) -0.004(4) 0.014(4) 0.003(4)
C5 0.027(3) 0.043(4) 0.055(5) 0.004(4) 0.004(3) 0.002(3)
C6 0.037(3) 0.031(4) 0.044(4) 0.001(3) 0.000(3) -0.002(3)
C7 0.044(4) 0.045(4) 0.047(5) 0.000(4) -0.015(3) 0.000(3)
C8 0.040(3) 0.035(4) 0.043(4) -0.003(3) -0.009(3) 0.001(3)
C9 0.044(4) 0.048(5) 0.052(5) -0.003(4) -0.016(3) 0.006(3)
O7 0.057(3) 0.047(3) 0.037(3) -0.003(2) -0.013(2) 0.011(3)
C10 0.061(5) 0.036(5) 0.071(6) -0.002(4) -0.007(4) 0.013(4)
C11 0.046(4) 0.032(4) 0.077(6) -0.011(4) -0.009(4) -0.004(3)
C12 0.046(4) 0.038(4) 0.049(5) -0.001(4) -0.005(3) -0.005(3)
C13 0.021(3) 0.027(3) 0.064(5) 0.004(3) -0.008(3) 0.002(3)
C14 0.025(3) 0.027(3) 0.052(4) 0.000(3) -0.005(3) 0.000(3)
C15 0.047(4) 0.047(5) 0.048(5) 0.003(4) 0.012(4) 0.004(4)
C16 0.048(4) 0.042(5) 0.092(8) 0.022(5) 0.022(5) 0.001(4)
C17 0.029(3) 0.024(4) 0.134(9) -0.002(5) 0.003(5) -0.003(3)
C18 0.036(3) 0.033(4) 0.073(6) 0.001(4) -0.017(4) 0.000(3)
C19 0.35(3) 0.28(3) 0.090(13) -0.052(15) 0.042(17) -0.08(3)
O1W 0.052(5) 0.082(7) 0.070(6) 0.000 0.008(4) 0.000
 
_geom_special_details
;
  All esds (except the esd in the dihedral angle between two l.s. planes)
  are estimated using the full covariance matrix.  The cell esds are taken
  into account individually in the estimation of esds in distances, angles
  and torsion angles; correlations between esds in cell parameters are only
  used when they are defined by crystal symmetry.  An approximate (isotropic)
  treatment of cell esds is used for estimating esds involving l.s. planes.
;
 
loop_
  _geom_bond_atom_site_label_1
  _geom_bond_atom_site_label_2
  _geom_bond_distance
  _geom_bond_site_symmetry_2
  _geom_bond_publ_flag
Gd1 O6 2.345(5) . ?
Gd1 O5 2.370(5) 3_565 ?
Gd1 O3 2.402(5) 2 ?
Gd1 O7 2.403(5) . ?
Gd1 O1 2.427(4) . ?
Gd1 O2W 2.460(4) . ?
Gd1 O4 2.475(5) 2 ?
Gd1 O2 2.502(4) . ?
Gd1 C7 2.794(8) 2 ?
Gd1 C1 2.837(6) . ?
Gd1 O6 2.943(5) 3_565 ?
Gd1 C13 3.032(7) 3_565 ?
Fe1 C9 2.019(7) . ?
Fe1 C6 2.021(7) . ?
Fe1 C2 2.027(6) . ?
Fe1 C8 2.038(7) . ?
Fe1 C3 2.041(7) . ?
Fe1 C11 2.044(7) . ?
Fe1 C5 2.048(7) . ?
Fe1 C10 2.049(8) . ?
Fe1 C12 2.051(7) . ?
Fe1 C4 2.061(8) . ?
Fe2 C14 2.018(6) 3 ?
Fe2 C14 2.018(6) . ?
Fe2 C15 2.027(7) 3 ?
Fe2 C15 2.027(7) . ?
Fe2 C18 2.045(7) . ?
Fe2 C18 2.045(7) 3 ?
Fe2 C16 2.046(8) 3 ?
Fe2 C16 2.046(8) . ?
Fe2 C17 2.057(7) 3 ?
Fe2 C17 2.057(7) . ?
O1 C1 1.258(7) . ?
O2 C1 1.254(8) . ?
O3 C7 1.270(9) . ?
O3 Gd1 2.402(5) 2 ?
O4 C7 1.289(8) . ?
O4 Gd1 2.475(5) 2 ?
O5 C13 1.261(8) . ?
O5 Gd1 2.370(5) 3_565 ?
O6 C13 1.249(8) . ?
O6 Gd1 2.943(5) 3_565 ?
C1 C2 1.487(8) . ?
C2 C3 1.414(9) . ?
C2 C6 1.432(9) . ?
C3 C4 1.391(10) . ?
C4 C5 1.404(10) . ?
C5 C6 1.389(9) . ?
C7 C8 1.484(10) . ?
C7 Gd1 2.794(8) 2 ?
C8 C12 1.426(9) . ?
C8 C9 1.428(9) . ?
C9 C10 1.389(11) . ?
O7 C19 1.57(2) . ?
C10 C11 1.432(10) . ?
C11 C12 1.411(11) . ?
C13 C14 1.484(9) . ?
C13 Gd1 3.032(7) 3_565 ?
C14 C15 1.405(10) . ?
C14 C18 1.427(10) . ?
C15 C16 1.405(11) . ?
C16 C17 1.428(13) . ?
C17 C18 1.420(12) . ?
 
loop_
  _geom_angle_atom_site_label_1
  _geom_angle_atom_site_label_2
  _geom_angle_atom_site_label_3
  _geom_angle
  _geom_angle_site_symmetry_1
  _geom_angle_site_symmetry_3
  _geom_angle_publ_flag
O6 Gd1 O5 118.22(18) . 3_565 ?
O6 Gd1 O3 98.32(17) . 2 ?
O5 Gd1 O3 140.19(17) 3_565 2 ?
O6 Gd1 O7 152.13(18) . . ?
O5 Gd1 O7 74.0(2) 3_565 . ?
O3 Gd1 O7 80.81(18) 2 . ?
O6 Gd1 O1 75.83(15) . . ?
O5 Gd1 O1 91.99(17) 3_565 . ?
O3 Gd1 O1 81.56(16) 2 . ?
O7 Gd1 O1 130.88(15) . . ?
O6 Gd1 O2W 78.04(16) . . ?
O5 Gd1 O2W 76.81(17) 3_565 . ?
O3 Gd1 O2W 129.35(16) 2 . ?
O7 Gd1 O2W 81.17(16) . . ?
O1 Gd1 O2W 142.12(15) . . ?
O6 Gd1 O4 81.18(18) . 2 ?
O5 Gd1 O4 141.51(19) 3_565 2 ?
O3 Gd1 O4 54.31(15) 2 2 ?
O7 Gd1 O4 75.76(18) . 2 ?
O1 Gd1 O4 126.04(16) . 2 ?
O2W Gd1 O4 75.46(16) . 2 ?
O6 Gd1 O2 127.93(16) . . ?
O5 Gd1 O2 73.35(16) 3_565 . ?
O3 Gd1 O2 71.73(16) 2 . ?
O7 Gd1 O2 78.55(16) . . ?
O1 Gd1 O2 52.39(14) . . ?
O2W Gd1 O2 147.50(16) . . ?
O4 Gd1 O2 122.77(15) 2 . ?
O6 Gd1 C7 91.7(2) . 2 ?
O5 Gd1 C7 148.6(2) 3_565 2 ?
O3 Gd1 C7 26.96(18) 2 2 ?
O7 Gd1 C7 74.9(2) . 2 ?
O1 Gd1 C7 105.26(19) . 2 ?
O2W Gd1 C7 102.44(19) . 2 ?
O4 Gd1 C7 27.48(18) 2 2 ?
O2 Gd1 C7 96.45(18) . 2 ?
O6 Gd1 C1 101.77(17) . . ?
O5 Gd1 C1 82.92(18) 3_565 . ?
O3 Gd1 C1 74.11(17) 2 . ?
O7 Gd1 C1 104.68(18) . . ?
O1 Gd1 C1 26.20(16) . . ?
O2W Gd1 C1 156.51(17) . . ?
O4 Gd1 C1 127.96(16) 2 . ?
O2 Gd1 C1 26.23(17) . . ?
C7 Gd1 C1 101.0(2) 2 . ?
O6 Gd1 O6 71.42(17) . 3_565 ?
O5 Gd1 O6 47.18(16) 3_565 3_565 ?
O3 Gd1 O6 155.77(16) 2 3_565 ?
O7 Gd1 O6 118.67(16) . 3_565 ?
O1 Gd1 O6 74.70(14) . 3_565 ?
O2W Gd1 O6 71.23(15) . 3_565 ?
O4 Gd1 O6 140.30(13) 2 3_565 ?
O2 Gd1 O6 96.85(14) . 3_565 ?
C7 Gd1 O6 162.75(17) 2 3_565 ?
C1 Gd1 O6 86.32(16) . 3_565 ?
O6 Gd1 C13 95.29(19) . 3_565 ?
O5 Gd1 C13 23.10(18) 3_565 3_565 ?
O3 Gd1 C13 156.36(16) 2 3_565 ?
O7 Gd1 C13 95.9(2) . 3_565 ?
O1 Gd1 C13 83.16(17) . 3_565 ?
O2W Gd1 C13 72.44(16) . 3_565 ?
O4 Gd1 C13 147.72(15) 2 3_565 ?
O2 Gd1 C13 84.66(15) . 3_565 ?
C7 Gd1 C13 170.2(2) 2 3_565 ?
C1 Gd1 C13 84.26(17) . 3_565 ?
O6 Gd1 C13 24.08(16) 3_565 3_565 ?
C9 Fe1 C6 117.8(3) . . ?
C9 Fe1 C2 153.6(3) . . ?
C6 Fe1 C2 41.4(3) . . ?
C9 Fe1 C8 41.2(3) . . ?
C6 Fe1 C8 107.5(3) . . ?
C2 Fe1 C8 119.7(3) . . ?
C9 Fe1 C3 163.3(3) . . ?
C6 Fe1 C3 68.4(3) . . ?
C2 Fe1 C3 40.7(3) . . ?
C8 Fe1 C3 154.8(3) . . ?
C9 Fe1 C11 68.4(3) . . ?
C6 Fe1 C11 165.8(3) . . ?
C2 Fe1 C11 127.9(3) . . ?
C8 Fe1 C11 68.0(3) . . ?
C3 Fe1 C11 109.5(3) . . ?
C9 Fe1 C5 106.6(3) . . ?
C6 Fe1 C5 39.9(3) . . ?
C2 Fe1 C5 68.1(3) . . ?
C8 Fe1 C5 126.3(3) . . ?
C3 Fe1 C5 67.5(3) . . ?
C11 Fe1 C5 153.5(3) . . ?
C9 Fe1 C10 39.9(3) . . ?
C6 Fe1 C10 151.4(3) . . ?
C2 Fe1 C10 165.7(3) . . ?
C8 Fe1 C10 67.9(3) . . ?
C3 Fe1 C10 127.7(3) . . ?
C11 Fe1 C10 40.9(3) . . ?
C5 Fe1 C10 118.5(3) . . ?
C9 Fe1 C12 69.1(3) . . ?
C6 Fe1 C12 127.6(3) . . ?
C2 Fe1 C12 108.6(3) . . ?
C8 Fe1 C12 40.8(3) . . ?
C3 Fe1 C12 120.8(3) . . ?
C11 Fe1 C12 40.3(3) . . ?
C5 Fe1 C12 164.4(3) . . ?
C10 Fe1 C12 68.4(3) . . ?
C9 Fe1 C4 126.0(3) . . ?
C6 Fe1 C4 67.3(3) . . ?
C2 Fe1 C4 67.5(3) . . ?
C8 Fe1 C4 163.6(3) . . ?
C3 Fe1 C4 39.6(3) . . ?
C11 Fe1 C4 120.7(3) . . ?
C5 Fe1 C4 40.0(3) . . ?
C10 Fe1 C4 108.7(3) . . ?
C12 Fe1 C4 154.5(3) . . ?
C14 Fe2 C14 180.0(3) 3 . ?
C14 Fe2 C15 40.7(3) 3 3 ?
C14 Fe2 C15 139.3(3) . 3 ?
C14 Fe2 C15 139.3(3) 3 . ?
C14 Fe2 C15 40.7(3) . . ?
C15 Fe2 C15 180.0(4) 3 . ?
C14 Fe2 C18 138.9(3) 3 . ?
C14 Fe2 C18 41.1(3) . . ?
C15 Fe2 C18 111.5(3) 3 . ?
C15 Fe2 C18 68.5(3) . . ?
C14 Fe2 C18 41.1(3) 3 3 ?
C14 Fe2 C18 138.9(3) . 3 ?
C15 Fe2 C18 68.5(3) 3 3 ?
C15 Fe2 C18 111.5(3) . 3 ?
C18 Fe2 C18 180.0(6) . 3 ?
C14 Fe2 C16 68.3(3) 3 3 ?
C14 Fe2 C16 111.7(3) . 3 ?
C15 Fe2 C16 40.3(3) 3 3 ?
C15 Fe2 C16 139.7(3) . 3 ?
C18 Fe2 C16 111.7(4) . 3 ?
C18 Fe2 C16 68.3(4) 3 3 ?
C14 Fe2 C16 111.7(3) 3 . ?
C14 Fe2 C16 68.3(3) . . ?
C15 Fe2 C16 139.7(3) 3 . ?
C15 Fe2 C16 40.3(3) . . ?
C18 Fe2 C16 68.3(4) . . ?
C18 Fe2 C16 111.7(4) 3 . ?
C16 Fe2 C16 180.0(6) 3 . ?
C14 Fe2 C17 68.7(3) 3 3 ?
C14 Fe2 C17 111.3(3) . 3 ?
C15 Fe2 C17 68.3(4) 3 3 ?
C15 Fe2 C17 111.7(4) . 3 ?
C18 Fe2 C17 139.5(3) . 3 ?
C18 Fe2 C17 40.5(3) 3 3 ?
C16 Fe2 C17 40.7(4) 3 3 ?
C16 Fe2 C17 139.3(4) . 3 ?
C14 Fe2 C17 111.3(3) 3 . ?
C14 Fe2 C17 68.7(3) . . ?
C15 Fe2 C17 111.7(4) 3 . ?
C15 Fe2 C17 68.3(4) . . ?
C18 Fe2 C17 40.5(3) . . ?
C18 Fe2 C17 139.5(3) 3 . ?
C16 Fe2 C17 139.3(4) 3 . ?
C16 Fe2 C17 40.7(4) . . ?
C17 Fe2 C17 180.0(4) 3 . ?
C1 O1 Gd1 95.4(4) . . ?
C1 O2 Gd1 91.9(4) . . ?
C7 O3 Gd1 94.0(4) . 2 ?
C7 O4 Gd1 90.2(4) . 2 ?
C13 O5 Gd1 109.4(4) . 3_565 ?
C13 O6 Gd1 167.0(4) . . ?
C13 O6 Gd1 82.0(4) . 3_565 ?
Gd1 O6 Gd1 108.58(17) . 3_565 ?
O2 C1 O1 120.1(6) . . ?
O2 C1 C2 120.2(6) . . ?
O1 C1 C2 119.7(6) . . ?
O2 C1 Gd1 61.8(3) . . ?
O1 C1 Gd1 58.4(3) . . ?
C2 C1 Gd1 175.3(4) . . ?
C3 C2 C6 106.8(6) . . ?
C3 C2 C1 126.9(6) . . ?
C6 C2 C1 126.2(6) . . ?
C3 C2 Fe1 70.2(4) . . ?
C6 C2 Fe1 69.1(4) . . ?
C1 C2 Fe1 124.1(5) . . ?
C4 C3 C2 108.2(6) . . ?
C4 C3 Fe1 71.0(5) . . ?
C2 C3 Fe1 69.1(4) . . ?
C3 C4 C5 108.7(6) . . ?
C3 C4 Fe1 69.4(4) . . ?
C5 C4 Fe1 69.5(4) . . ?
C6 C5 C4 108.3(6) . . ?
C6 C5 Fe1 69.0(4) . . ?
C4 C5 Fe1 70.5(4) . . ?
C5 C6 C2 108.0(6) . . ?
C5 C6 Fe1 71.1(4) . . ?
C2 C6 Fe1 69.5(4) . . ?
O3 C7 O4 120.9(7) . . ?
O3 C7 C8 119.8(6) . . ?
O4 C7 C8 119.2(7) . . ?
O3 C7 Gd1 59.0(4) . 2 ?
O4 C7 Gd1 62.4(4) . 2 ?
C8 C7 Gd1 175.4(5) . 2 ?
C12 C8 C9 108.0(6) . . ?
C12 C8 C7 124.4(6) . . ?
C9 C8 C7 127.3(6) . . ?
C12 C8 Fe1 70.1(4) . . ?
C9 C8 Fe1 68.7(4) . . ?
C7 C8 Fe1 121.9(5) . . ?
C10 C9 C8 108.3(6) . . ?
C10 C9 Fe1 71.2(4) . . ?
C8 C9 Fe1 70.1(4) . . ?
C19 O7 Gd1 127.8(8) . . ?
C9 C10 C11 108.1(7) . . ?
C9 C10 Fe1 68.9(4) . . ?
C11 C10 Fe1 69.3(4) . . ?
C12 C11 C10 108.4(7) . . ?
C12 C11 Fe1 70.1(4) . . ?
C10 C11 Fe1 69.7(4) . . ?
C11 C12 C8 107.1(6) . . ?
C11 C12 Fe1 69.6(4) . . ?
C8 C12 Fe1 69.1(4) . . ?
O6 C13 O5 121.4(6) . . ?
O6 C13 C14 122.6(7) . . ?
O5 C13 C14 116.0(6) . . ?
O6 C13 Gd1 74.0(4) . 3_565 ?
O5 C13 Gd1 47.5(3) . 3_565 ?
C14 C13 Gd1 163.5(5) . 3_565 ?
C15 C14 C18 108.0(7) . . ?
C15 C14 C13 127.8(7) . . ?
C18 C14 C13 124.1(7) . . ?
C15 C14 Fe2 70.0(4) . . ?
C18 C14 Fe2 70.4(4) . . ?
C13 C14 Fe2 122.8(4) . . ?
C16 C15 C14 108.6(7) . . ?
C16 C15 Fe2 70.5(5) . . ?
C14 C15 Fe2 69.3(4) . . ?
C15 C16 C17 108.1(7) . . ?
C15 C16 Fe2 69.1(4) . . ?
C17 C16 Fe2 70.1(5) . . ?
C18 C17 C16 107.5(7) . . ?
C18 C17 Fe2 69.3(4) . . ?
C16 C17 Fe2 69.2(4) . . ?
C17 C18 C14 107.7(8) . . ?
C17 C18 Fe2 70.2(4) . . ?
C14 C18 Fe2 68.4(4) . . ?
 
_diffrn_measured_fraction_theta_max    0.926
_diffrn_reflns_theta_full              28.01
_diffrn_measured_fraction_theta_full   0.926
_refine_diff_density_max    4.256
_refine_diff_density_min   -0.823
_refine_diff_density_rms    0.197

#===END

data_compound_7
 
_audit_creation_method            SHELXL-97
_chemical_name_systematic
;
  ?
;
_chemical_name_common             ?
_chemical_melting_point           ?
_chemical_formula_moiety          ?
_chemical_formula_sum
  'C68 H72 Fe6 La2 N0 O19'
_chemical_formula_weight          1806.18
 
loop_
  _atom_type_symbol
  _atom_type_description
  _atom_type_scat_dispersion_real
  _atom_type_scat_dispersion_imag
  _atom_type_scat_source
  'C'  'C'   0.0033   0.0016
  'International Tables Vol C Tables 4.2.6.8 and 6.1.1.4'
  'H'  'H'   0.0000   0.0000
  'International Tables Vol C Tables 4.2.6.8 and 6.1.1.4'
  'N'  'N'   0.0061   0.0033
  'International Tables Vol C Tables 4.2.6.8 and 6.1.1.4'
  'O'  'O'   0.0106   0.0060
  'International Tables Vol C Tables 4.2.6.8 and 6.1.1.4'
  'Fe'  'Fe'   0.3463   0.8444
  'International Tables Vol C Tables 4.2.6.8 and 6.1.1.4'
  'La'  'La'  -0.2871   2.4523
  'International Tables Vol C Tables 4.2.6.8 and 6.1.1.4'
 
_symmetry_cell_setting           'Triclinic'
_symmetry_space_group_name_H-M   'P-1  '
loop_
  _symmetry_equiv_pos_as_xyz
  'x, y, z'
  '-x, -y, -z'
 
_cell_length_a                    8.8793(11)
_cell_length_b                    14.454(2)
_cell_length_c                    15.2975(19)
_cell_angle_alpha                 117.445(3)
_cell_angle_beta                  105.601(2)
_cell_angle_gamma                 90.953(2)
_cell_volume                      1655.2(4)
_cell_formula_units_Z             1
_cell_measurement_temperature     293(2)
_cell_measurement_reflns_used     3890
_cell_measurement_theta_min       4.19
_cell_measurement_theta_max       26.38
 
_exptl_crystal_description        block
_exptl_crystal_colour             yellow-red
_exptl_crystal_size_max           0.40
_exptl_crystal_size_mid           0.30
_exptl_crystal_size_min           0.20
_exptl_crystal_density_meas       ?
_exptl_crystal_density_diffrn     1.812
_exptl_crystal_density_method     'not measured'
_exptl_crystal_F_000              902
_exptl_absorpt_coefficient_mu     2.609
_exptl_absorpt_correction_type   'empirical'
_exptl_absorpt_correction_T_min  0.3631
_exptl_absorpt_correction_T_max  0.5619
_exptl_absorpt_process_details    sadabs
 
_exptl_special_details
;
  ?
;
 
_diffrn_ambient_temperature       293(2)
_diffrn_radiation_wavelength      0.71073
_diffrn_radiation_type            MoK\a
_diffrn_radiation_source          'fine-focus sealed tube'
_diffrn_radiation_monochromator   graphite
_diffrn_measurement_device_type  'CCD area detector'
_diffrn_measurement_method       'phi and omega scans'
_diffrn_reflns_number             8046
_diffrn_reflns_av_R_equivalents   0.0327
_diffrn_reflns_av_sigmaI/netI     0.0706
_diffrn_reflns_limit_h_min        -10
_diffrn_reflns_limit_h_max        10
_diffrn_reflns_limit_k_min        -11
_diffrn_reflns_limit_k_max        17
_diffrn_reflns_limit_l_min        -18
_diffrn_reflns_limit_l_max        17
_diffrn_reflns_theta_min          2.41
_diffrn_reflns_theta_max          25.00
_reflns_number_total              5482
_reflns_number_gt                 4390
_reflns_threshold_expression      >2sigma(I)
 
_computing_data_collection      'Bruker SMART'
_computing_cell_refinement      'Bruker SMART'
_computing_data_reduction       'Bruker SAINT'
_computing_structure_solution   'Bruker SHELXTL'
_computing_structure_refinement 'Bruker SHELXTL'
_computing_molecular_graphics   'Bruker SHELXTL'
_computing_publication_material 'Bruker SHELXTL'
 
_refine_special_details
;
  Refinement of F^2^ against ALL reflections.  The weighted R-factor wR and
  goodness of fit S are based on F^2^, conventional R-factors R are based
  on F, with F set to zero for negative F^2^. The threshold expression of
  F^2^ > 2sigma(F^2^) is used only for calculating R-factors(gt) etc. and is
  not relevant to the choice of reflections for refinement.  R-factors based
  on F^2^ are statistically about twice as large as those based on F, and R-
  factors based on ALL data will be even larger.
;
 
_refine_ls_structure_factor_coef  Fsqd
_refine_ls_matrix_type            full
_refine_ls_weighting_scheme       calc
_refine_ls_weighting_details
  'calc w=1/[\s^2^(Fo^2^)+(0.0000P)^2^+0.0000P] where P=(Fo^2^+2Fc^2^)/3'
_atom_sites_solution_primary      direct
_atom_sites_solution_secondary    difmap
_atom_sites_solution_hydrogens    geom
_refine_ls_hydrogen_treatment     mixed
_refine_ls_extinction_method      none
_refine_ls_extinction_coef        ?
_refine_ls_number_reflns          5482
_refine_ls_number_parameters      428
_refine_ls_number_restraints      0
_refine_ls_R_factor_all           0.0521
_refine_ls_R_factor_gt            0.0384
_refine_ls_wR_factor_ref          0.0611
_refine_ls_wR_factor_gt           0.0586
_refine_ls_goodness_of_fit_ref    1.017
_refine_ls_restrained_S_all       1.017
_refine_ls_shift/su_max           0.001
_refine_ls_shift/su_mean          0.000
 
loop_
  _atom_site_label
  _atom_site_type_symbol
  _atom_site_fract_x
  _atom_site_fract_y
  _atom_site_fract_z
  _atom_site_U_iso_or_equiv
  _atom_site_adp_type
  _atom_site_occupancy
  _atom_site_symmetry_multiplicity
  _atom_site_calc_flag
  _atom_site_refinement_flags
  _atom_site_disorder_assembly
  _atom_site_disorder_group
La1 La 0.29036(3) 0.55514(2) 0.45498(2) 0.02858(9) Uani 1 1 d . . .
O1W O 0.2576(3) 0.4836(2) 0.5705(2) 0.0425(9) Uani 1 1 d . . .
H1WA H 0.3186 0.4650 0.6184 0.051 Uiso 1 1 d R . .
H1WB H 0.1605 0.4511 0.5508 0.051 Uiso 1 1 d R . .
O2W O 0.0451(4) 0.4154(3) 0.3478(2) 0.0484(10) Uani 1 1 d . . .
H2WA H -0.0176 0.4170 0.2893 0.058 Uiso 1 1 d R . .
H2WB H 0.0118 0.3606 0.3689 0.058 Uiso 1 1 d R . .
Fe1 Fe 0.38021(9) 0.19426(6) 0.11722(5) 0.0401(2) Uani 1 1 d . . .
Fe2 Fe 0.00092(9) 0.91379(6) 0.63493(6) 0.0428(2) Uani 1 1 d . . .
Fe3 Fe 0.37068(10) 0.71576(6) 0.19536(6) 0.0532(2) Uani 1 1 d . . .
O1 O 0.4297(3) 0.4013(3) 0.4003(2) 0.0355(8) Uani 1 1 d . . .
O2 O 0.5742(4) 0.2771(3) 0.3880(2) 0.0478(10) Uani 1 1 d . . .
O3 O 0.0581(4) 0.6315(3) 0.5200(3) 0.0431(9) Uani 1 1 d . . .
O4 O 0.1463(4) 0.6961(3) 0.4351(2) 0.0408(9) Uani 1 1 d . . .
O5 O 0.2634(4) 0.5213(3) 0.2728(2) 0.0411(9) Uani 1 1 d . . .
O6 O 0.4868(4) 0.6135(3) 0.3941(2) 0.0420(9) Uani 1 1 d . . .
C1 C 0.4540(6) 0.3058(4) 0.3517(4) 0.0330(12) Uani 1 1 d . . .
C2 C 0.3375(6) 0.2300(4) 0.2507(4) 0.0354(13) Uani 1 1 d . . .
C3 C 0.2147(6) 0.2518(4) 0.1868(4) 0.0460(15) Uani 1 1 d . . .
H3A H 0.1816 0.3208 0.2038 0.055 Uiso 1 1 calc R . .
C4 C 0.1465(6) 0.1571(5) 0.0953(4) 0.0606(19) Uani 1 1 d . . .
H4A H 0.0587 0.1488 0.0361 0.073 Uiso 1 1 calc R . .
C5 C 0.2255(7) 0.0767(5) 0.1008(4) 0.0566(17) Uani 1 1 d . . .
H5A H 0.2030 0.0026 0.0465 0.068 Uiso 1 1 calc R . .
C6 C 0.3454(6) 0.1207(4) 0.1965(4) 0.0449(14) Uani 1 1 d . . .
H6A H 0.4200 0.0827 0.2218 0.054 Uiso 1 1 calc R . .
C7 C 0.5757(8) 0.1592(6) 0.0715(7) 0.071(2) Uani 1 1 d . . .
H7A H 0.6367 0.1042 0.0746 0.085 Uiso 1 1 calc R . .
C8 C 0.4508(10) 0.1467(7) -0.0095(5) 0.086(3) Uani 1 1 d . . .
H8A H 0.4063 0.0813 -0.0754 0.103 Uiso 1 1 calc R . .
C9 C 0.3996(11) 0.2414(10) 0.0164(9) 0.109(4) Uani 1 1 d . . .
H9A H 0.3127 0.2561 -0.0281 0.131 Uiso 1 1 calc R . .
C10 C 0.4930(14) 0.3128(6) 0.1136(9) 0.105(4) Uani 1 1 d . . .
H10A H 0.4850 0.3878 0.1513 0.126 Uiso 1 1 calc R . .
C11 C 0.6013(9) 0.2622(8) 0.1481(5) 0.081(2) Uani 1 1 d . . .
H11A H 0.6846 0.2941 0.2154 0.097 Uiso 1 1 calc R . .
C12 C 0.0569(6) 0.6975(4) 0.4867(4) 0.0360(13) Uani 1 1 d . . .
C13 C -0.0551(6) 0.7726(4) 0.5055(4) 0.0351(13) Uani 1 1 d . . .
C14 C -0.0624(6) 0.8553(4) 0.4791(4) 0.0429(14) Uani 1 1 d . . .
H14A H -0.0009 0.8687 0.4405 0.051 Uiso 1 1 calc R . .
C15 C -0.1770(6) 0.9140(4) 0.5191(4) 0.0518(16) Uani 1 1 d . . .
H15A H -0.2065 0.9770 0.5144 0.062 Uiso 1 1 calc R . .
C16 C -0.2380(6) 0.8693(4) 0.5684(4) 0.0541(16) Uani 1 1 d . . .
H16A H -0.3175 0.8954 0.6038 0.065 Uiso 1 1 calc R . .
C17 C -0.1637(6) 0.7829(4) 0.5617(4) 0.0445(14) Uani 1 1 d . . .
H17A H -0.1838 0.7369 0.5899 0.053 Uiso 1 1 calc R . .
C18 C 0.2195(7) 0.9197(5) 0.7241(4) 0.066(2) Uani 1 1 d . . .
H18A H 0.2857 0.8644 0.7068 0.079 Uiso 1 1 calc R . .
C19 C 0.2186(7) 1.0030(6) 0.7006(4) 0.0669(19) Uani 1 1 d . . .
H19A H 0.2842 1.0163 0.6640 0.080 Uiso 1 1 calc R . .
C20 C 0.1093(8) 1.0640(5) 0.7399(5) 0.071(2) Uani 1 1 d . . .
H20A H 0.0836 1.1273 0.7347 0.085 Uiso 1 1 calc R . .
C21 C 0.0405(8) 1.0195(5) 0.7862(5) 0.073(2) Uani 1 1 d . . .
H21A H -0.0413 1.0463 0.8193 0.088 Uiso 1 1 calc R . .
C22 C 0.1068(7) 0.9305(5) 0.7774(4) 0.0649(18) Uani 1 1 d . . .
H22A H 0.0811 0.8839 0.8036 0.078 Uiso 1 1 calc R . .
C23 C 0.3943(6) 0.5775(4) 0.3016(4) 0.0345(12) Uani 1 1 d . . .
C24 C 0.4446(6) 0.6028(4) 0.2307(4) 0.0357(13) Uani 1 1 d . . .
C25 C 0.3735(7) 0.5606(4) 0.1234(4) 0.0488(15) Uani 1 1 d . . .
H25A H 0.2805 0.5048 0.0802 0.059 Uiso 1 1 calc R . .
C26 C 0.4597(7) 0.6114(5) 0.0890(4) 0.0573(17) Uani 1 1 d . . .
H26A H 0.4361 0.5978 0.0174 0.069 Uiso 1 1 calc R . .
C27 C 0.5830(7) 0.6852(5) 0.1733(5) 0.0601(17) Uani 1 1 d . . .
H27A H 0.6605 0.7327 0.1714 0.072 Uiso 1 1 calc R . .
C28 C 0.5758(6) 0.6806(4) 0.2615(4) 0.0505(15) Uani 1 1 d . . .
H28A H 0.6472 0.7244 0.3323 0.061 Uiso 1 1 calc R . .
C29 C 0.2087(15) 0.7795(9) 0.2658(10) 0.107(4) Uani 1 1 d . . .
H29A H 0.1714 0.7617 0.3118 0.129 Uiso 1 1 calc R . .
C30 C 0.3405(13) 0.8595(7) 0.2952(8) 0.113(3) Uani 1 1 d . . .
H30A H 0.4111 0.9066 0.3654 0.136 Uiso 1 1 calc R . .
C31 C 0.3444(13) 0.8579(7) 0.2046(11) 0.107(3) Uani 1 1 d . . .
H31A H 0.4223 0.9029 0.1999 0.129 Uiso 1 1 calc R . .
C32 C 0.2271(15) 0.7854(10) 0.1246(9) 0.118(3) Uani 1 1 d . . .
H32A H 0.2045 0.7685 0.0521 0.142 Uiso 1 1 calc R . .
C33 C 0.1442(11) 0.7370(8) 0.1613(11) 0.112(3) Uani 1 1 d . . .
H33A H 0.0528 0.6800 0.1182 0.135 Uiso 1 1 calc R . .
C34 C -0.1434(9) 0.5176(7) 0.1795(7) 0.164(5) Uani 1 1 d . . .
H34A H -0.1707 0.5452 0.2425 0.245 Uiso 1 1 calc R . .
H34B H -0.2384 0.4888 0.1212 0.245 Uiso 1 1 calc R . .
H34C H -0.0837 0.5734 0.1792 0.245 Uiso 1 1 calc R . .
O7 O -0.0547(7) 0.4404(5) 0.1733(4) 0.137(2) Uani 1 1 d . . .
H7B H -0.0191 0.4065 0.1228 0.165 Uiso 1 1 d R . .
O3W O 0.3857(13) 0.8824(9) 0.5182(8) 0.127(4) Uiso 0.50 1 d P . .
 
loop_
  _atom_site_aniso_label
  _atom_site_aniso_U_11
  _atom_site_aniso_U_22
  _atom_site_aniso_U_33
  _atom_site_aniso_U_23
  _atom_site_aniso_U_13
  _atom_site_aniso_U_12
La1 0.02843(16) 0.02962(18) 0.02785(16) 0.01219(14) 0.01208(12) 0.00632(13)
O1W 0.031(2) 0.059(3) 0.048(2) 0.036(2) 0.0087(17) 0.0057(17)
O2W 0.045(2) 0.053(2) 0.041(2) 0.018(2) 0.0132(18) -0.0025(19)
Fe1 0.0489(5) 0.0367(5) 0.0303(4) 0.0116(4) 0.0145(4) 0.0054(4)
Fe2 0.0437(5) 0.0377(5) 0.0417(5) 0.0155(4) 0.0122(4) 0.0109(4)
Fe3 0.0658(6) 0.0466(6) 0.0632(6) 0.0329(5) 0.0314(5) 0.0212(5)
O1 0.037(2) 0.031(2) 0.0317(19) 0.0087(17) 0.0123(16) 0.0087(17)
O2 0.050(2) 0.040(2) 0.035(2) 0.0089(19) 0.0036(18) 0.0183(19)
O3 0.046(2) 0.040(2) 0.057(2) 0.028(2) 0.0278(19) 0.0157(18)
O4 0.040(2) 0.050(2) 0.042(2) 0.025(2) 0.0237(18) 0.0162(18)
O5 0.038(2) 0.047(2) 0.038(2) 0.0208(19) 0.0122(17) 0.0016(18)
O6 0.037(2) 0.055(3) 0.0338(19) 0.0256(19) 0.0052(17) -0.0013(18)
C1 0.039(3) 0.033(3) 0.030(3) 0.015(3) 0.016(3) 0.007(3)
C2 0.037(3) 0.035(3) 0.029(3) 0.010(3) 0.012(2) 0.003(3)
C3 0.039(3) 0.055(4) 0.036(3) 0.015(3) 0.015(3) 0.013(3)
C4 0.042(4) 0.073(5) 0.035(3) 0.004(4) 0.005(3) -0.005(3)
C5 0.063(4) 0.045(4) 0.039(3) 0.002(3) 0.017(3) -0.015(3)
C6 0.058(4) 0.033(4) 0.040(3) 0.014(3) 0.018(3) -0.002(3)
C7 0.075(5) 0.078(6) 0.092(5) 0.053(5) 0.050(5) 0.031(4)
C8 0.093(6) 0.103(7) 0.032(4) 0.007(5) 0.028(4) -0.031(5)
C9 0.111(8) 0.177(11) 0.139(9) 0.139(9) 0.069(7) 0.067(8)
C10 0.167(10) 0.053(6) 0.141(9) 0.047(6) 0.114(8) 0.028(6)
C11 0.070(5) 0.100(7) 0.050(4) 0.020(5) 0.018(4) -0.035(5)
C12 0.034(3) 0.033(3) 0.034(3) 0.011(3) 0.009(2) 0.004(3)
C13 0.034(3) 0.030(3) 0.036(3) 0.012(3) 0.011(2) 0.005(2)
C14 0.040(3) 0.046(4) 0.037(3) 0.018(3) 0.007(3) 0.007(3)
C15 0.052(4) 0.038(4) 0.053(4) 0.020(3) 0.003(3) 0.017(3)
C16 0.038(3) 0.050(4) 0.066(4) 0.021(4) 0.016(3) 0.014(3)
C17 0.042(3) 0.037(4) 0.049(3) 0.014(3) 0.019(3) 0.008(3)
C18 0.048(4) 0.069(5) 0.051(4) 0.013(4) 0.000(3) 0.030(4)
C19 0.050(4) 0.081(6) 0.049(4) 0.023(4) 0.002(3) -0.009(4)
C20 0.075(5) 0.045(4) 0.059(4) 0.014(4) -0.007(4) -0.002(4)
C21 0.074(5) 0.065(5) 0.047(4) 0.003(4) 0.011(4) 0.026(4)
C22 0.078(5) 0.068(5) 0.042(4) 0.026(4) 0.010(3) 0.017(4)
C23 0.040(3) 0.030(3) 0.038(3) 0.017(3) 0.017(3) 0.014(3)
C24 0.046(3) 0.034(3) 0.034(3) 0.018(3) 0.020(3) 0.012(3)
C25 0.062(4) 0.039(4) 0.047(3) 0.021(3) 0.017(3) 0.011(3)
C26 0.082(5) 0.062(5) 0.042(4) 0.030(4) 0.032(4) 0.024(4)
C27 0.067(4) 0.072(5) 0.067(4) 0.044(4) 0.040(4) 0.019(4)
C28 0.049(4) 0.064(4) 0.045(3) 0.031(3) 0.017(3) 0.007(3)
C29 0.147(10) 0.102(8) 0.165(10) 0.094(8) 0.125(9) 0.089(7)
C30 0.170(11) 0.067(7) 0.105(8) 0.027(6) 0.072(8) 0.071(7)
C31 0.132(10) 0.057(6) 0.156(10) 0.060(7) 0.062(8) 0.036(6)
C32 0.130(9) 0.131(10) 0.166(11) 0.119(10) 0.062(9) 0.081(8)
C33 0.087(7) 0.110(8) 0.178(11) 0.092(9) 0.054(8) 0.058(6)
C34 0.082(7) 0.140(10) 0.221(11) 0.076(9) -0.003(7) 0.035(6)
O7 0.106(5) 0.175(6) 0.113(4) 0.069(5) 0.008(4) 0.023(4)
 
_geom_special_details
;
  All esds (except the esd in the dihedral angle between two l.s. planes)
  are estimated using the full covariance matrix.  The cell esds are taken
  into account individually in the estimation of esds in distances, angles
  and torsion angles; correlations between esds in cell parameters are only
  used when they are defined by crystal symmetry.  An approximate (isotropic)
  treatment of cell esds is used for estimating esds involving l.s. planes.
;
 
loop_
  _geom_bond_atom_site_label_1
  _geom_bond_atom_site_label_2
  _geom_bond_distance
  _geom_bond_site_symmetry_2
  _geom_bond_publ_flag
La1 O2 2.464(3) 2_666 ?
La1 O1 2.472(3) . ?
La1 O6 2.484(3) . ?
La1 O1W 2.495(3) . ?
La1 O4 2.516(3) . ?
La1 O2W 2.528(3) . ?
La1 O5 2.538(3) . ?
La1 O3 2.574(3) . ?
La1 O1 2.680(3) 2_666 ?
La1 C23 2.883(5) . ?
La1 C12 2.920(5) . ?
La1 C1 2.950(5) 2_666 ?
Fe1 C9 1.995(7) . ?
Fe1 C10 2.000(8) . ?
Fe1 C2 2.007(4) . ?
Fe1 C3 2.012(5) . ?
Fe1 C11 2.013(6) . ?
Fe1 C8 2.016(6) . ?
Fe1 C6 2.019(5) . ?
Fe1 C7 2.029(6) . ?
Fe1 C4 2.032(5) . ?
Fe1 C5 2.045(6) . ?
Fe2 C13 2.011(5) . ?
Fe2 C17 2.012(5) . ?
Fe2 C19 2.022(6) . ?
Fe2 C18 2.024(6) . ?
Fe2 C22 2.024(6) . ?
Fe2 C21 2.024(6) . ?
Fe2 C20 2.026(6) . ?
Fe2 C14 2.030(5) . ?
Fe2 C15 2.033(5) . ?
Fe2 C16 2.035(5) . ?
Fe3 C25 1.996(5) . ?
Fe3 C33 2.003(8) . ?
Fe3 C26 2.004(5) . ?
Fe3 C30 2.009(7) . ?
Fe3 C29 2.010(7) . ?
Fe3 C24 2.011(5) . ?
Fe3 C31 2.016(8) . ?
Fe3 C27 2.024(5) . ?
Fe3 C28 2.028(5) . ?
Fe3 C32 2.028(8) . ?
O1 C1 1.286(5) . ?
O1 La1 2.680(3) 2_666 ?
O2 C1 1.236(5) . ?
O2 La1 2.464(3) 2_666 ?
O3 C12 1.271(6) . ?
O4 C12 1.256(5) . ?
O5 C23 1.252(5) . ?
O6 C23 1.276(5) . ?
C1 C2 1.483(6) . ?
C1 La1 2.950(5) 2_666 ?
C2 C3 1.402(6) . ?
C2 C6 1.420(6) . ?
C3 C4 1.397(6) . ?
C4 C5 1.391(8) . ?
C5 C6 1.400(7) . ?
C7 C8 1.359(9) . ?
C7 C11 1.371(8) . ?
C8 C9 1.361(10) . ?
C9 C10 1.364(11) . ?
C10 C11 1.359(10) . ?
C12 C13 1.467(6) . ?
C13 C17 1.423(6) . ?
C13 C14 1.424(7) . ?
C14 C15 1.420(6) . ?
C15 C16 1.391(7) . ?
C16 C17 1.397(7) . ?
C18 C19 1.406(8) . ?
C18 C22 1.420(7) . ?
C19 C20 1.391(8) . ?
C20 C21 1.387(8) . ?
C21 C22 1.389(8) . ?
C23 C24 1.461(6) . ?
C24 C25 1.403(6) . ?
C24 C28 1.419(7) . ?
C25 C26 1.399(7) . ?
C26 C27 1.391(7) . ?
C27 C28 1.399(7) . ?
C29 C33 1.361(11) . ?
C29 C30 1.450(11) . ?
C30 C31 1.385(11) . ?
C31 C32 1.333(11) . ?
C32 C33 1.383(11) . ?
C34 O7 1.359(8) . ?
 
loop_
  _geom_angle_atom_site_label_1
  _geom_angle_atom_site_label_2
  _geom_angle_atom_site_label_3
  _geom_angle
  _geom_angle_site_symmetry_1
  _geom_angle_site_symmetry_3
  _geom_angle_publ_flag
O2 La1 O1 120.06(10) 2_666 . ?
O2 La1 O6 79.65(11) 2_666 . ?
O1 La1 O6 78.92(11) . . ?
O2 La1 O1W 88.08(11) 2_666 . ?
O1 La1 O1W 78.47(10) . . ?
O6 La1 O1W 144.15(10) . . ?
O2 La1 O4 74.18(11) 2_666 . ?
O1 La1 O4 155.55(10) . . ?
O6 La1 O4 84.97(11) . . ?
O1W La1 O4 123.96(10) . . ?
O2 La1 O2W 148.63(10) 2_666 . ?
O1 La1 O2W 83.33(10) . . ?
O6 La1 O2W 128.31(10) . . ?
O1W La1 O2W 75.80(11) . . ?
O4 La1 O2W 92.57(11) . . ?
O2 La1 O5 123.31(12) 2_666 . ?
O1 La1 O5 81.28(10) . . ?
O6 La1 O5 51.75(10) . . ?
O1W La1 O5 148.30(11) . . ?
O4 La1 O5 74.31(10) . . ?
O2W La1 O5 77.85(11) . . ?
O2 La1 O3 77.97(11) 2_666 . ?
O1 La1 O3 146.17(11) . . ?
O6 La1 O3 134.62(11) . . ?
O1W La1 O3 73.55(10) . . ?
O4 La1 O3 51.07(10) . . ?
O2W La1 O3 71.76(10) . . ?
O5 La1 O3 114.11(11) . . ?
O2 La1 O1 50.18(10) 2_666 2_666 ?
O1 La1 O1 70.28(11) . 2_666 ?
O6 La1 O1 74.80(10) . 2_666 ?
O1W La1 O1 71.54(10) . 2_666 ?
O4 La1 O1 122.94(10) . 2_666 ?
O2W La1 O1 141.22(11) . 2_666 ?
O5 La1 O1 123.33(10) . 2_666 ?
O3 La1 O1 116.75(10) . 2_666 ?
O2 La1 C23 101.03(13) 2_666 . ?
O1 La1 C23 80.95(12) . . ?
O6 La1 C23 26.18(11) . . ?
O1W La1 C23 159.38(11) . . ?
O4 La1 C23 76.56(12) . . ?
O2W La1 C23 103.33(13) . . ?
O5 La1 C23 25.70(11) . . ?
O3 La1 C23 126.24(12) . . ?
O1 La1 C23 100.06(12) 2_666 . ?
O2 La1 C12 73.33(12) 2_666 . ?
O1 La1 C12 165.94(12) . . ?
O6 La1 C12 109.44(13) . . ?
O1W La1 C12 98.80(13) . . ?
O4 La1 C12 25.35(11) . . ?
O2W La1 C12 82.63(12) . . ?
O5 La1 C12 94.96(12) . . ?
O3 La1 C12 25.77(11) . . ?
O1 La1 C12 122.26(11) 2_666 . ?
C23 La1 C12 101.53(14) . . ?
O2 La1 C1 24.35(11) 2_666 2_666 ?
O1 La1 C1 96.00(13) . 2_666 ?
O6 La1 C1 76.55(11) . 2_666 ?
O1W La1 C1 78.55(12) . 2_666 ?
O4 La1 C1 98.01(13) . 2_666 ?
O2W La1 C1 153.94(12) . 2_666 ?
O5 La1 C1 127.94(12) . 2_666 ?
O3 La1 C1 96.70(12) . 2_666 ?
O1 La1 C1 25.85(10) 2_666 2_666 ?
C23 La1 C1 102.27(14) . 2_666 ?
C12 La1 C1 96.97(13) . 2_666 ?
C9 Fe1 C10 39.9(3) . . ?
C9 Fe1 C2 147.7(4) . . ?
C10 Fe1 C2 116.0(3) . . ?
C9 Fe1 C3 115.3(3) . . ?
C10 Fe1 C3 107.4(3) . . ?
C2 Fe1 C3 40.82(18) . . ?
C9 Fe1 C11 66.6(3) . . ?
C10 Fe1 C11 39.6(3) . . ?
C2 Fe1 C11 109.5(2) . . ?
C3 Fe1 C11 130.1(3) . . ?
C9 Fe1 C8 39.7(3) . . ?
C10 Fe1 C8 66.7(3) . . ?
C2 Fe1 C8 170.8(3) . . ?
C3 Fe1 C8 148.2(3) . . ?
C11 Fe1 C8 66.4(3) . . ?
C9 Fe1 C6 169.6(4) . . ?
C10 Fe1 C6 149.7(4) . . ?
C2 Fe1 C6 41.31(18) . . ?
C3 Fe1 C6 68.9(2) . . ?
C11 Fe1 C6 118.8(3) . . ?
C8 Fe1 C6 132.3(3) . . ?
C9 Fe1 C7 66.3(3) . . ?
C10 Fe1 C7 66.5(3) . . ?
C2 Fe1 C7 132.4(3) . . ?
C3 Fe1 C7 169.2(3) . . ?
C11 Fe1 C7 39.6(2) . . ?
C8 Fe1 C7 39.3(2) . . ?
C6 Fe1 C7 111.5(2) . . ?
C9 Fe1 C4 108.7(3) . . ?
C10 Fe1 C4 129.8(4) . . ?
C2 Fe1 C4 68.0(2) . . ?
C3 Fe1 C4 40.41(18) . . ?
C11 Fe1 C4 167.9(4) . . ?
C8 Fe1 C4 117.8(3) . . ?
C6 Fe1 C4 67.8(2) . . ?
C7 Fe1 C4 150.3(3) . . ?
C9 Fe1 C5 130.9(4) . . ?
C10 Fe1 C5 168.2(4) . . ?
C2 Fe1 C5 68.3(2) . . ?
C3 Fe1 C5 68.0(2) . . ?
C11 Fe1 C5 151.5(4) . . ?
C8 Fe1 C5 111.0(3) . . ?
C6 Fe1 C5 40.3(2) . . ?
C7 Fe1 C5 119.8(3) . . ?
C4 Fe1 C5 39.9(2) . . ?
C13 Fe2 C17 41.43(17) . . ?
C13 Fe2 C19 123.1(2) . . ?
C17 Fe2 C19 158.4(3) . . ?
C13 Fe2 C18 107.1(2) . . ?
C17 Fe2 C18 121.2(3) . . ?
C19 Fe2 C18 40.7(2) . . ?
C13 Fe2 C22 122.4(2) . . ?
C17 Fe2 C22 105.3(3) . . ?
C19 Fe2 C22 68.6(3) . . ?
C18 Fe2 C22 41.1(2) . . ?
C13 Fe2 C21 158.3(3) . . ?
C17 Fe2 C21 121.5(3) . . ?
C19 Fe2 C21 67.9(3) . . ?
C18 Fe2 C21 68.1(2) . . ?
C22 Fe2 C21 40.1(2) . . ?
C13 Fe2 C20 159.6(3) . . ?
C17 Fe2 C20 158.4(3) . . ?
C19 Fe2 C20 40.2(2) . . ?
C18 Fe2 C20 67.7(3) . . ?
C22 Fe2 C20 67.6(3) . . ?
C21 Fe2 C20 40.1(2) . . ?
C13 Fe2 C14 41.27(19) . . ?
C17 Fe2 C14 69.5(2) . . ?
C19 Fe2 C14 109.0(2) . . ?
C18 Fe2 C14 124.2(2) . . ?
C22 Fe2 C14 160.2(2) . . ?
C21 Fe2 C14 158.8(3) . . ?
C20 Fe2 C14 124.0(3) . . ?
C13 Fe2 C15 68.6(2) . . ?
C17 Fe2 C15 68.1(2) . . ?
C19 Fe2 C15 125.7(3) . . ?
C18 Fe2 C15 161.7(3) . . ?
C22 Fe2 C15 156.4(2) . . ?
C21 Fe2 C15 122.5(2) . . ?
C20 Fe2 C15 109.7(2) . . ?
C14 Fe2 C15 40.91(18) . . ?
C13 Fe2 C16 68.5(2) . . ?
C17 Fe2 C16 40.38(19) . . ?
C19 Fe2 C16 160.7(3) . . ?
C18 Fe2 C16 156.7(3) . . ?
C22 Fe2 C16 120.5(3) . . ?
C21 Fe2 C16 107.1(3) . . ?
C20 Fe2 C16 124.1(3) . . ?
C14 Fe2 C16 68.5(2) . . ?
C15 Fe2 C16 40.0(2) . . ?
C25 Fe3 C33 107.7(3) . . ?
C25 Fe3 C26 40.9(2) . . ?
C33 Fe3 C26 122.5(4) . . ?
C25 Fe3 C30 162.1(4) . . ?
C33 Fe3 C30 67.8(4) . . ?
C26 Fe3 C30 156.4(5) . . ?
C25 Fe3 C29 123.1(4) . . ?
C33 Fe3 C29 39.6(3) . . ?
C26 Fe3 C29 158.4(5) . . ?
C30 Fe3 C29 42.3(3) . . ?
C25 Fe3 C24 40.99(18) . . ?
C33 Fe3 C24 123.9(4) . . ?
C26 Fe3 C24 68.7(2) . . ?
C30 Fe3 C24 126.0(4) . . ?
C29 Fe3 C24 109.0(3) . . ?
C25 Fe3 C31 155.5(4) . . ?
C33 Fe3 C31 66.4(4) . . ?
C26 Fe3 C31 120.4(4) . . ?
C30 Fe3 C31 40.3(3) . . ?
C29 Fe3 C31 68.6(4) . . ?
C24 Fe3 C31 162.0(4) . . ?
C25 Fe3 C27 68.7(2) . . ?
C33 Fe3 C27 157.7(5) . . ?
C26 Fe3 C27 40.4(2) . . ?
C30 Fe3 C27 122.3(4) . . ?
C29 Fe3 C27 160.5(5) . . ?
C24 Fe3 C27 68.7(2) . . ?
C31 Fe3 C27 107.2(3) . . ?
C25 Fe3 C28 68.9(2) . . ?
C33 Fe3 C28 160.7(4) . . ?
C26 Fe3 C28 68.1(2) . . ?
C30 Fe3 C28 109.4(3) . . ?
C29 Fe3 C28 125.2(4) . . ?
C24 Fe3 C28 41.14(19) . . ?
C31 Fe3 C28 124.6(4) . . ?
C27 Fe3 C28 40.41(19) . . ?
C25 Fe3 C32 121.7(4) . . ?
C33 Fe3 C32 40.1(3) . . ?
C26 Fe3 C32 106.2(3) . . ?
C30 Fe3 C32 66.8(4) . . ?
C29 Fe3 C32 67.7(4) . . ?
C24 Fe3 C32 158.6(5) . . ?
C31 Fe3 C32 38.5(3) . . ?
C27 Fe3 C32 121.7(4) . . ?
C28 Fe3 C32 158.1(4) . . ?
C1 O1 La1 160.5(3) . . ?
C1 O1 La1 88.9(3) . 2_666 ?
La1 O1 La1 109.72(11) . 2_666 ?
C1 O2 La1 100.4(3) . 2_666 ?
C12 O3 La1 92.5(3) . . ?
C12 O4 La1 95.6(3) . . ?
C23 O5 La1 92.7(3) . . ?
C23 O6 La1 94.6(3) . . ?
O2 C1 O1 120.5(4) . . ?
O2 C1 C2 119.9(5) . . ?
O1 C1 C2 119.6(5) . . ?
O2 C1 La1 55.3(2) . 2_666 ?
O1 C1 La1 65.3(2) . 2_666 ?
C2 C1 La1 174.4(3) . 2_666 ?
C3 C2 C6 107.9(4) . . ?
C3 C2 C1 128.1(5) . . ?
C6 C2 C1 123.7(5) . . ?
C3 C2 Fe1 69.8(3) . . ?
C6 C2 Fe1 69.8(3) . . ?
C1 C2 Fe1 120.6(3) . . ?
C4 C3 C2 107.6(5) . . ?
C4 C3 Fe1 70.6(3) . . ?
C2 C3 Fe1 69.4(3) . . ?
C5 C4 C3 109.0(5) . . ?
C5 C4 Fe1 70.5(3) . . ?
C3 C4 Fe1 69.0(3) . . ?
C4 C5 C6 108.1(5) . . ?
C4 C5 Fe1 69.6(4) . . ?
C6 C5 Fe1 68.9(3) . . ?
C5 C6 C2 107.4(5) . . ?
C5 C6 Fe1 70.8(3) . . ?
C2 C6 Fe1 68.9(3) . . ?
C8 C7 C11 107.9(7) . . ?
C8 C7 Fe1 69.9(4) . . ?
C11 C7 Fe1 69.5(4) . . ?
C7 C8 C9 108.0(7) . . ?
C7 C8 Fe1 70.9(3) . . ?
C9 C8 Fe1 69.3(4) . . ?
C8 C9 C10 108.2(9) . . ?
C8 C9 Fe1 71.0(4) . . ?
C10 C9 Fe1 70.2(5) . . ?
C11 C10 C9 107.9(8) . . ?
C11 C10 Fe1 70.7(5) . . ?
C9 C10 Fe1 69.8(5) . . ?
C10 C11 C7 108.0(7) . . ?
C10 C11 Fe1 69.7(5) . . ?
C7 C11 Fe1 70.8(4) . . ?
O4 C12 O3 120.6(5) . . ?
O4 C12 C13 120.2(5) . . ?
O3 C12 C13 119.2(5) . . ?
O4 C12 La1 59.0(2) . . ?
O3 C12 La1 61.7(2) . . ?
C13 C12 La1 177.7(4) . . ?
C17 C13 C14 107.9(4) . . ?
C17 C13 C12 126.5(5) . . ?
C14 C13 C12 125.3(5) . . ?
C17 C13 Fe2 69.3(3) . . ?
C14 C13 Fe2 70.1(3) . . ?
C12 C13 Fe2 121.6(3) . . ?
C15 C14 C13 106.5(5) . . ?
C15 C14 Fe2 69.7(3) . . ?
C13 C14 Fe2 68.7(3) . . ?
C16 C15 C14 109.0(5) . . ?
C16 C15 Fe2 70.1(3) . . ?
C14 C15 Fe2 69.4(3) . . ?
C15 C16 C17 108.7(5) . . ?
C15 C16 Fe2 69.9(3) . . ?
C17 C16 Fe2 68.9(3) . . ?
C16 C17 C13 107.8(5) . . ?
C16 C17 Fe2 70.7(3) . . ?
C13 C17 Fe2 69.3(3) . . ?
C19 C18 C22 107.5(6) . . ?
C19 C18 Fe2 69.6(3) . . ?
C22 C18 Fe2 69.5(3) . . ?
C20 C19 C18 107.6(6) . . ?
C20 C19 Fe2 70.1(4) . . ?
C18 C19 Fe2 69.8(4) . . ?
C21 C20 C19 108.9(6) . . ?
C21 C20 Fe2 69.9(4) . . ?
C19 C20 Fe2 69.7(4) . . ?
C20 C21 C22 108.5(6) . . ?
C20 C21 Fe2 70.0(4) . . ?
C22 C21 Fe2 69.9(3) . . ?
C21 C22 C18 107.5(6) . . ?
C21 C22 Fe2 69.9(4) . . ?
C18 C22 Fe2 69.5(3) . . ?
O5 C23 O6 120.2(5) . . ?
O5 C23 C24 121.1(5) . . ?
O6 C23 C24 118.7(5) . . ?
O5 C23 La1 61.6(3) . . ?
O6 C23 La1 59.2(2) . . ?
C24 C23 La1 172.8(3) . . ?
C25 C24 C28 107.4(5) . . ?
C25 C24 C23 128.2(5) . . ?
C28 C24 C23 124.4(5) . . ?
C25 C24 Fe3 68.9(3) . . ?
C28 C24 Fe3 70.1(3) . . ?
C23 C24 Fe3 124.5(3) . . ?
C26 C25 C24 107.9(5) . . ?
C26 C25 Fe3 69.8(3) . . ?
C24 C25 Fe3 70.1(3) . . ?
C27 C26 C25 108.8(5) . . ?
C27 C26 Fe3 70.6(3) . . ?
C25 C26 Fe3 69.2(3) . . ?
C26 C27 C28 108.0(5) . . ?
C26 C27 Fe3 69.0(3) . . ?
C28 C27 Fe3 69.9(3) . . ?
C27 C28 C24 107.9(5) . . ?
C27 C28 Fe3 69.7(3) . . ?
C24 C28 Fe3 68.8(3) . . ?
C33 C29 C30 105.4(9) . . ?
C33 C29 Fe3 69.9(5) . . ?
C30 C29 Fe3 68.8(4) . . ?
C31 C30 C29 106.4(9) . . ?
C31 C30 Fe3 70.1(4) . . ?
C29 C30 Fe3 68.9(4) . . ?
C32 C31 C30 109.8(10) . . ?
C32 C31 Fe3 71.3(5) . . ?
C30 C31 Fe3 69.6(5) . . ?
C31 C32 C33 108.3(10) . . ?
C31 C32 Fe3 70.3(5) . . ?
C33 C32 Fe3 69.0(5) . . ?
C29 C33 C32 110.1(11) . . ?
C29 C33 Fe3 70.5(5) . . ?
C32 C33 Fe3 70.9(5) . . ?
 
_diffrn_measured_fraction_theta_max    0.939
_diffrn_reflns_theta_full              25.00
_diffrn_measured_fraction_theta_full   0.939
_refine_diff_density_max    0.804
_refine_diff_density_min   -0.588
_refine_diff_density_rms    0.092

#===END

data_compound_8
 
_audit_creation_method            SHELXL-97
_chemical_name_systematic
;
  ?
;
_chemical_name_common             ?
_chemical_melting_point           ?
_chemical_formula_moiety          ?
_chemical_formula_sum
  'C68 H72 Eu2 Fe6 N0 O19'
_chemical_formula_weight          1832.28
 
loop_
  _atom_type_symbol
  _atom_type_description
  _atom_type_scat_dispersion_real
  _atom_type_scat_dispersion_imag
  _atom_type_scat_source
  'C'  'C'   0.0033   0.0016
  'International Tables Vol C Tables 4.2.6.8 and 6.1.1.4'
  'H'  'H'   0.0000   0.0000
  'International Tables Vol C Tables 4.2.6.8 and 6.1.1.4'
  'N'  'N'   0.0061   0.0033
  'International Tables Vol C Tables 4.2.6.8 and 6.1.1.4'
  'O'  'O'   0.0106   0.0060
  'International Tables Vol C Tables 4.2.6.8 and 6.1.1.4'
  'Fe'  'Fe'   0.3463   0.8444
  'International Tables Vol C Tables 4.2.6.8 and 6.1.1.4'
  'Eu'  'Eu'  -0.1578   3.6682
  'International Tables Vol C Tables 4.2.6.8 and 6.1.1.4'
 
_symmetry_cell_setting            'Triclinic'
_symmetry_space_group_name_H-M    'P-1'
 
loop_
  _symmetry_equiv_pos_as_xyz
  'x, y, z'
  '-x, -y, -z'
 
_cell_length_a                    8.7979(9)
_cell_length_b                    14.4451(14)
_cell_length_c                    15.2535(15)
_cell_angle_alpha                 117.2293(14)
_cell_angle_beta                  105.3013(17)
_cell_angle_gamma                 91.0310(19)
_cell_volume                      1640.7(3)
_cell_formula_units_Z             1
_cell_measurement_temperature     293(2)
_cell_measurement_reflns_used     3764
_cell_measurement_theta_min       2.43
_cell_measurement_theta_max       26.33
 
_exptl_crystal_description        block
_exptl_crystal_colour             pale-yellow
_exptl_crystal_size_max           0.25
_exptl_crystal_size_mid           0.15
_exptl_crystal_size_min           0.15
_exptl_crystal_density_meas       ?
_exptl_crystal_density_diffrn     1.854
_exptl_crystal_density_method     'not measured'
_exptl_crystal_F_000              914
_exptl_absorpt_coefficient_mu     3.242
_exptl_absorpt_correction_type   'empirical'
_exptl_absorpt_correction_T_min  0.4456
_exptl_absorpt_correction_T_max  0.6315
_exptl_absorpt_process_details    sadabs
 
_exptl_special_details
;
  ?
;
 
_diffrn_ambient_temperature       293(2)
_diffrn_radiation_wavelength      0.71073
_diffrn_radiation_type            MoK\a
_diffrn_radiation_source          'fine-focus sealed tube'
_diffrn_radiation_monochromator   graphite
_diffrn_measurement_device_type  'CCD area detector'
_diffrn_measurement_method       'phi and omega scans'
_diffrn_reflns_number             8134
_diffrn_reflns_av_R_equivalents   0.0311
_diffrn_reflns_av_sigmaI/netI     0.0550
_diffrn_reflns_limit_h_min        -7
_diffrn_reflns_limit_h_max        10
_diffrn_reflns_limit_k_min        -17
_diffrn_reflns_limit_k_max        15
_diffrn_reflns_limit_l_min        -15
_diffrn_reflns_limit_l_max        18
_diffrn_reflns_theta_min          2.43
_diffrn_reflns_theta_max          25.00
_reflns_number_total              5622
_reflns_number_gt                 4886
_reflns_threshold_expression      >2sigma(I)
 
_computing_data_collection      'Bruker SMART'
_computing_cell_refinement      'Bruker SMART'
_computing_data_reduction       'Bruker SAINT'
_computing_structure_solution   'Bruker SHELXTL'
_computing_structure_refinement 'Bruker SHELXTL'
_computing_molecular_graphics   'Bruker SHELXTL'
_computing_publication_material 'Bruker SHELXTL'

_refine_special_details
;
  Refinement of F^2^ against ALL reflections.  The weighted R-factor wR and
  goodness of fit S are based on F^2^, conventional R-factors R are based
  on F, with F set to zero for negative F^2^. The threshold expression of
  F^2^ > 2sigma(F^2^) is used only for calculating R-factors(gt) etc. and is
  not relevant to the choice of reflections for refinement.  R-factors based
  on F^2^ are statistically about twice as large as those based on F, and R-
  factors based on ALL data will be even larger.
;
 
_refine_ls_structure_factor_coef  Fsqd
_refine_ls_matrix_type            full
_refine_ls_weighting_scheme       calc
_refine_ls_weighting_details
  'calc w=1/[\s^2^(Fo^2^)+(0.0150P)^2^+0.0000P] where P=(Fo^2^+2Fc^2^)/3'
_atom_sites_solution_primary      direct
_atom_sites_solution_secondary    difmap
_atom_sites_solution_hydrogens    geom
_refine_ls_hydrogen_treatment     mixed
_refine_ls_extinction_method      none
_refine_ls_extinction_coef        ?
_refine_ls_number_reflns          5622
_refine_ls_number_parameters      428
_refine_ls_number_restraints      0
_refine_ls_R_factor_all           0.0393
_refine_ls_R_factor_gt            0.0323
_refine_ls_wR_factor_ref          0.0623
_refine_ls_wR_factor_gt           0.0607
_refine_ls_goodness_of_fit_ref    1.030
_refine_ls_restrained_S_all       1.030
_refine_ls_shift/su_max           0.001
_refine_ls_shift/su_mean          0.000
 
loop_
  _atom_site_label
  _atom_site_type_symbol
  _atom_site_fract_x
  _atom_site_fract_y
  _atom_site_fract_z
  _atom_site_U_iso_or_equiv
  _atom_site_adp_type
  _atom_site_occupancy
  _atom_site_symmetry_multiplicity
  _atom_site_calc_flag
  _atom_site_refinement_flags
  _atom_site_disorder_assembly
  _atom_site_disorder_group
Eu1 Eu 0.29279(2) 0.554838(17) 0.457480(16) 0.02537(7) Uani 1 1 d . . .
O1W O 0.2592(3) 0.4825(2) 0.5672(2) 0.0373(8) Uani 1 1 d . . .
H1WA H 0.3202 0.4639 0.6151 0.045 Uiso 1 1 d R . .
H1WB H 0.1621 0.4500 0.5475 0.045 Uiso 1 1 d R . .
O2W O 0.0545(3) 0.4227(2) 0.3517(2) 0.0416(8) Uani 1 1 d . . .
H2WA H -0.0082 0.4243 0.2931 0.050 Uiso 1 1 d R . .
H2WB H 0.0212 0.3679 0.3727 0.050 Uiso 1 1 d R . .
Fe1 Fe 0.38233(8) 0.19641(5) 0.11811(5) 0.03547(17) Uani 1 1 d . . .
Fe2 Fe 0.00624(8) 0.91165(5) 0.63436(5) 0.03839(18) Uani 1 1 d . . .
Fe3 Fe 0.36683(9) 0.71461(6) 0.19715(6) 0.0473(2) Uani 1 1 d . . .
O1 O 0.4307(3) 0.4074(2) 0.4029(2) 0.0302(7) Uani 1 1 d . . .
O2 O 0.5801(4) 0.2847(2) 0.3891(2) 0.0393(8) Uani 1 1 d . . .
O3 O 0.0644(3) 0.6287(2) 0.5234(2) 0.0389(8) Uani 1 1 d . . .
O4 O 0.1528(3) 0.6900(2) 0.4359(2) 0.0376(8) Uani 1 1 d . . .
O5 O 0.2622(3) 0.5203(2) 0.2795(2) 0.0351(7) Uani 1 1 d . . .
O6 O 0.4842(3) 0.6173(2) 0.4011(2) 0.0368(8) Uani 1 1 d . . .
C1 C 0.4557(5) 0.3124(3) 0.3532(3) 0.0301(10) Uani 1 1 d . . .
C2 C 0.3394(5) 0.2357(3) 0.2538(3) 0.0317(11) Uani 1 1 d . . .
C3 C 0.2145(5) 0.2566(4) 0.1877(3) 0.0422(12) Uani 1 1 d . . .
H3A H 0.1815 0.3254 0.2030 0.051 Uiso 1 1 calc R . .
C4 C 0.1454(6) 0.1605(4) 0.0968(4) 0.0520(15) Uani 1 1 d . . .
H4A H 0.0575 0.1516 0.0372 0.062 Uiso 1 1 calc R . .
C5 C 0.2254(6) 0.0801(4) 0.1043(4) 0.0496(14) Uani 1 1 d . . .
H5A H 0.2030 0.0058 0.0511 0.059 Uiso 1 1 calc R . .
C6 C 0.3466(6) 0.1254(4) 0.2011(4) 0.0404(12) Uani 1 1 d . . .
H6A H 0.4216 0.0879 0.2273 0.049 Uiso 1 1 calc R . .
C7 C 0.5779(7) 0.1554(5) 0.0695(5) 0.0640(16) Uani 1 1 d . . .
H7A H 0.6361 0.0989 0.0715 0.077 Uiso 1 1 calc R . .
C8 C 0.4521(8) 0.1467(6) -0.0108(4) 0.075(2) Uani 1 1 d . . .
H8A H 0.4040 0.0816 -0.0760 0.090 Uiso 1 1 calc R . .
C9 C 0.4018(9) 0.2422(8) 0.0149(7) 0.098(3) Uani 1 1 d . . .
H9A H 0.3149 0.2580 -0.0290 0.117 Uiso 1 1 calc R . .
C10 C 0.5004(10) 0.3140(5) 0.1138(7) 0.088(2) Uani 1 1 d . . .
H10A H 0.4955 0.3894 0.1520 0.105 Uiso 1 1 calc R . .
C11 C 0.6080(7) 0.2597(6) 0.1471(4) 0.0689(19) Uani 1 1 d . . .
H11A H 0.6922 0.2899 0.2139 0.083 Uiso 1 1 calc R . .
C12 C 0.0618(5) 0.6936(4) 0.4885(3) 0.0335(11) Uani 1 1 d . . .
C13 C -0.0499(5) 0.7693(3) 0.5059(3) 0.0334(11) Uani 1 1 d . . .
C14 C -0.0584(6) 0.8508(4) 0.4777(4) 0.0422(12) Uani 1 1 d . . .
H14A H 0.0047 0.8632 0.4387 0.051 Uiso 1 1 calc R . .
C15 C -0.1714(6) 0.9110(4) 0.5167(4) 0.0474(13) Uani 1 1 d . . .
H15A H -0.1997 0.9734 0.5103 0.057 Uiso 1 1 calc R . .
C16 C -0.2358(6) 0.8679(4) 0.5677(4) 0.0515(14) Uani 1 1 d . . .
H16A H -0.3167 0.8949 0.6025 0.062 Uiso 1 1 calc R . .
C17 C -0.1606(5) 0.7811(4) 0.5625(4) 0.0389(12) Uani 1 1 d . . .
H17A H -0.1816 0.7362 0.5918 0.047 Uiso 1 1 calc R . .
C18 C 0.2228(6) 0.9157(5) 0.7243(4) 0.0574(15) Uani 1 1 d . . .
H18A H 0.2885 0.8596 0.7088 0.069 Uiso 1 1 calc R . .
C19 C 0.2263(7) 0.9992(5) 0.6996(4) 0.0671(18) Uani 1 1 d . . .
H19A H 0.2942 1.0108 0.6627 0.081 Uiso 1 1 calc R . .
C20 C 0.1158(8) 1.0618(5) 0.7373(5) 0.0717(19) Uani 1 1 d . . .
H20A H 0.0916 1.1246 0.7307 0.086 Uiso 1 1 calc R . .
C21 C 0.0451(7) 1.0196(5) 0.7855(4) 0.0700(18) Uani 1 1 d . . .
H21A H -0.0375 1.0476 0.8184 0.084 Uiso 1 1 calc R . .
C22 C 0.1109(7) 0.9317(5) 0.7788(4) 0.0608(16) Uani 1 1 d . . .
H22A H 0.0823 0.8864 0.8061 0.073 Uiso 1 1 calc R . .
C23 C 0.3938(5) 0.5789(3) 0.3085(3) 0.0313(10) Uani 1 1 d . . .
C24 C 0.4455(5) 0.6040(3) 0.2362(3) 0.0321(11) Uani 1 1 d . . .
C25 C 0.3724(6) 0.5590(4) 0.1279(4) 0.0429(12) Uani 1 1 d . . .
H25A H 0.2797 0.5026 0.0861 0.052 Uiso 1 1 calc R . .
C26 C 0.4594(6) 0.6082(4) 0.0908(4) 0.0511(14) Uani 1 1 d . . .
H26A H 0.4363 0.5930 0.0186 0.061 Uiso 1 1 calc R . .
C27 C 0.5834(6) 0.6845(4) 0.1759(4) 0.0531(15) Uani 1 1 d . . .
H27A H 0.6606 0.7319 0.1730 0.064 Uiso 1 1 calc R . .
C28 C 0.5757(5) 0.6823(4) 0.2662(4) 0.0454(13) Uani 1 1 d . . .
H28A H 0.6468 0.7272 0.3367 0.054 Uiso 1 1 calc R . .
C29 C 0.2049(13) 0.7815(8) 0.2695(9) 0.114(4) Uani 1 1 d . . .
H29A H 0.1687 0.7663 0.3177 0.137 Uiso 1 1 calc R . .
C30 C 0.3359(11) 0.8606(6) 0.2943(7) 0.104(3) Uani 1 1 d . . .
H30A H 0.4081 0.9090 0.3634 0.125 Uiso 1 1 calc R . .
C31 C 0.3386(11) 0.8552(6) 0.2021(8) 0.091(2) Uani 1 1 d . . .
H31A H 0.4162 0.8988 0.1949 0.110 Uiso 1 1 calc R . .
C32 C 0.2193(11) 0.7805(7) 0.1231(7) 0.104(3) Uani 1 1 d . . .
H32A H 0.1966 0.7613 0.0499 0.125 Uiso 1 1 calc R . .
C33 C 0.1379(9) 0.7338(7) 0.1612(9) 0.110(3) Uani 1 1 d . . .
H33A H 0.0464 0.6766 0.1197 0.133 Uiso 1 1 calc R . .
C34 C -0.1413(8) 0.5157(6) 0.1775(7) 0.132(4) Uani 1 1 d . . .
H34A H -0.1710 0.5452 0.2399 0.197 Uiso 1 1 calc R . .
H34B H -0.2358 0.4845 0.1187 0.197 Uiso 1 1 calc R . .
H34C H -0.0821 0.5704 0.1749 0.197 Uiso 1 1 calc R . .
O7 O -0.0512(6) 0.4422(5) 0.1760(4) 0.1131(18) Uani 1 1 d . . .
H7B H -0.0157 0.4083 0.1256 0.136 Uiso 1 1 d R . .
O3W O 0.3888(11) 0.8782(8) 0.5160(8) 0.110(3) Uiso 0.50 1 d P . .
 
loop_
  _atom_site_aniso_label
  _atom_site_aniso_U_11
  _atom_site_aniso_U_22
  _atom_site_aniso_U_33
  _atom_site_aniso_U_23
  _atom_site_aniso_U_13
  _atom_site_aniso_U_12
Eu1 0.02605(13) 0.02809(13) 0.02426(12) 0.01301(10) 0.01032(9) 0.00418(9)
O1W 0.0304(17) 0.050(2) 0.0397(18) 0.0298(17) 0.0081(14) 0.0014(14)
O2W 0.041(2) 0.049(2) 0.0317(18) 0.0187(16) 0.0091(15) -0.0063(15)
Fe1 0.0430(4) 0.0350(4) 0.0269(4) 0.0128(3) 0.0124(3) 0.0040(3)
Fe2 0.0397(4) 0.0350(4) 0.0375(4) 0.0159(3) 0.0098(3) 0.0081(3)
Fe3 0.0593(5) 0.0422(5) 0.0583(5) 0.0325(4) 0.0292(4) 0.0177(4)
O1 0.0373(18) 0.0255(17) 0.0234(15) 0.0079(14) 0.0101(13) 0.0016(13)
O2 0.043(2) 0.0352(19) 0.0303(18) 0.0104(15) 0.0063(15) 0.0136(15)
O3 0.046(2) 0.0347(19) 0.052(2) 0.0269(17) 0.0276(16) 0.0137(15)
O4 0.0357(18) 0.047(2) 0.0404(19) 0.0253(17) 0.0193(15) 0.0116(15)
O5 0.0354(18) 0.0370(19) 0.0317(17) 0.0163(15) 0.0093(14) 0.0002(14)
O6 0.0338(18) 0.052(2) 0.0303(17) 0.0246(16) 0.0089(14) 0.0009(15)
C1 0.033(3) 0.034(3) 0.024(2) 0.012(2) 0.014(2) 0.003(2)
C2 0.034(3) 0.033(3) 0.029(2) 0.013(2) 0.015(2) 0.001(2)
C3 0.033(3) 0.055(3) 0.033(3) 0.016(3) 0.009(2) 0.011(2)
C4 0.035(3) 0.065(4) 0.035(3) 0.012(3) 0.004(2) -0.007(3)
C5 0.056(3) 0.038(3) 0.038(3) 0.005(3) 0.015(3) -0.013(3)
C6 0.049(3) 0.037(3) 0.040(3) 0.020(2) 0.019(2) 0.001(2)
C7 0.070(4) 0.068(4) 0.083(5) 0.045(4) 0.050(4) 0.027(3)
C8 0.083(5) 0.100(6) 0.034(3) 0.019(4) 0.030(3) -0.008(4)
C9 0.090(6) 0.168(9) 0.115(7) 0.123(7) 0.048(5) 0.048(6)
C10 0.131(7) 0.049(4) 0.127(7) 0.050(5) 0.093(6) 0.019(4)
C11 0.061(4) 0.089(5) 0.043(3) 0.019(4) 0.021(3) -0.024(4)
C12 0.029(3) 0.031(3) 0.033(3) 0.011(2) 0.006(2) 0.000(2)
C13 0.030(3) 0.030(3) 0.040(3) 0.017(2) 0.009(2) 0.004(2)
C14 0.042(3) 0.045(3) 0.039(3) 0.023(3) 0.004(2) 0.006(2)
C15 0.043(3) 0.041(3) 0.050(3) 0.020(3) 0.004(3) 0.015(2)
C16 0.036(3) 0.047(3) 0.066(4) 0.019(3) 0.021(3) 0.011(2)
C17 0.036(3) 0.035(3) 0.050(3) 0.019(2) 0.022(2) 0.008(2)
C18 0.043(3) 0.065(4) 0.045(3) 0.017(3) 0.001(3) 0.022(3)
C19 0.048(4) 0.087(5) 0.048(4) 0.027(4) -0.001(3) -0.023(3)
C20 0.073(5) 0.040(4) 0.063(4) 0.014(3) -0.016(4) -0.003(3)
C21 0.073(4) 0.067(5) 0.039(3) 0.004(3) 0.010(3) 0.023(4)
C22 0.073(4) 0.063(4) 0.042(3) 0.027(3) 0.008(3) 0.012(3)
C23 0.036(3) 0.033(3) 0.032(3) 0.019(2) 0.014(2) 0.011(2)
C24 0.041(3) 0.032(3) 0.030(2) 0.018(2) 0.016(2) 0.010(2)
C25 0.055(3) 0.038(3) 0.040(3) 0.022(2) 0.015(2) 0.010(2)
C26 0.071(4) 0.059(4) 0.042(3) 0.033(3) 0.030(3) 0.020(3)
C27 0.062(4) 0.063(4) 0.063(4) 0.044(3) 0.037(3) 0.012(3)
C28 0.041(3) 0.059(4) 0.044(3) 0.031(3) 0.013(2) 0.002(2)
C29 0.165(9) 0.124(8) 0.183(10) 0.125(8) 0.150(8) 0.118(7)
C30 0.152(8) 0.061(5) 0.112(7) 0.031(5) 0.073(6) 0.058(5)
C31 0.122(7) 0.057(5) 0.138(8) 0.063(5) 0.072(6) 0.045(4)
C32 0.108(7) 0.108(7) 0.142(8) 0.093(7) 0.044(6) 0.057(5)
C33 0.065(5) 0.115(7) 0.208(11) 0.111(9) 0.062(6) 0.050(5)
C34 0.066(5) 0.122(8) 0.207(10) 0.100(8) 0.002(6) 0.014(5)
O7 0.087(4) 0.150(5) 0.107(4) 0.077(4) 0.008(3) 0.018(3)
 
_geom_special_details
;
  All esds (except the esd in the dihedral angle between two l.s. planes)
  are estimated using the full covariance matrix.  The cell esds are taken
  into account individually in the estimation of esds in distances, angles
  and torsion angles; correlations between esds in cell parameters are only
  used when they are defined by crystal symmetry.  An approximate (isotropic)
  treatment of cell esds is used for estimating esds involving l.s. planes.
;
 
loop_
  _geom_bond_atom_site_label_1
  _geom_bond_atom_site_label_2
  _geom_bond_distance
  _geom_bond_site_symmetry_2
  _geom_bond_publ_flag
Eu1 O2 2.379(3) 2_666 ?
Eu1 O1 2.389(3) . ?
Eu1 O6 2.409(3) . ?
Eu1 O1W 2.415(3) . ?
Eu1 O2W 2.428(3) . ?
Eu1 O4 2.429(3) . ?
Eu1 O5 2.461(3) . ?
Eu1 O3 2.519(3) . ?
Eu1 O1 2.628(3) 2_666 ?
Eu1 C23 2.802(4) . ?
Eu1 C12 2.856(5) . ?
Eu1 C1 2.885(4) 2_666 ?
Fe1 C9 2.009(6) . ?
Fe1 C10 2.011(6) . ?
Fe1 C11 2.019(5) . ?
Fe1 C2 2.023(4) . ?
Fe1 C3 2.023(5) . ?
Fe1 C8 2.029(5) . ?
Fe1 C6 2.035(4) . ?
Fe1 C4 2.042(5) . ?
Fe1 C7 2.042(5) . ?
Fe1 C5 2.053(5) . ?
Fe2 C18 2.015(5) . ?
Fe2 C17 2.017(4) . ?
Fe2 C19 2.021(5) . ?
Fe2 C13 2.020(4) . ?
Fe2 C20 2.027(5) . ?
Fe2 C22 2.031(5) . ?
Fe2 C21 2.034(6) . ?
Fe2 C14 2.037(5) . ?
Fe2 C15 2.041(5) . ?
Fe2 C16 2.047(5) . ?
Fe3 C33 2.002(7) . ?
Fe3 C25 2.008(5) . ?
Fe3 C24 2.019(4) . ?
Fe3 C31 2.021(6) . ?
Fe3 C29 2.021(7) . ?
Fe3 C30 2.022(7) . ?
Fe3 C26 2.030(5) . ?
Fe3 C32 2.030(7) . ?
Fe3 C27 2.038(5) . ?
Fe3 C28 2.040(5) . ?
O1 C1 1.285(5) . ?
O1 Eu1 2.628(3) 2_666 ?
O2 C1 1.248(5) . ?
O2 Eu1 2.379(3) 2_666 ?
O3 C12 1.270(5) . ?
O4 C12 1.262(5) . ?
O5 C23 1.267(5) . ?
O6 C23 1.269(5) . ?
C1 C2 1.475(6) . ?
C1 Eu1 2.885(4) 2_666 ?
C2 C3 1.421(6) . ?
C2 C6 1.431(6) . ?
C3 C4 1.408(6) . ?
C4 C5 1.402(7) . ?
C5 C6 1.416(6) . ?
C7 C8 1.370(8) . ?
C7 C11 1.389(8) . ?
C8 C9 1.369(9) . ?
C9 C10 1.396(10) . ?
C10 C11 1.381(9) . ?
C12 C13 1.464(6) . ?
C13 C14 1.423(6) . ?
C13 C17 1.427(6) . ?
C14 C15 1.403(7) . ?
C15 C16 1.405(6) . ?
C16 C17 1.408(7) . ?
C18 C22 1.407(7) . ?
C18 C19 1.421(8) . ?
C19 C20 1.394(8) . ?
C20 C21 1.391(8) . ?
C21 C22 1.378(8) . ?
C23 C24 1.477(5) . ?
C24 C28 1.415(6) . ?
C24 C25 1.416(6) . ?
C25 C26 1.410(6) . ?
C26 C27 1.411(7) . ?
C27 C28 1.411(6) . ?
C29 C33 1.407(11) . ?
C29 C30 1.451(10) . ?
C30 C31 1.380(10) . ?
C31 C32 1.349(10) . ?
C32 C33 1.365(9) . ?
C34 O7 1.332(8) . ?
 
loop_
  _geom_angle_atom_site_label_1
  _geom_angle_atom_site_label_2
  _geom_angle_atom_site_label_3
  _geom_angle
  _geom_angle_site_symmetry_1
  _geom_angle_site_symmetry_3
  _geom_angle_publ_flag
O2 Eu1 O1 120.41(10) 2_666 . ?
O2 Eu1 O6 79.61(10) 2_666 . ?
O1 Eu1 O6 79.65(10) . . ?
O2 Eu1 O1W 87.73(10) 2_666 . ?
O1 Eu1 O1W 78.82(10) . . ?
O6 Eu1 O1W 144.80(10) . . ?
O2 Eu1 O2W 147.89(11) 2_666 . ?
O1 Eu1 O2W 84.24(10) . . ?
O6 Eu1 O2W 128.16(10) . . ?
O1W Eu1 O2W 76.66(10) . . ?
O2 Eu1 O4 74.89(10) 2_666 . ?
O1 Eu1 O4 153.91(10) . . ?
O6 Eu1 O4 83.10(10) . . ?
O1W Eu1 O4 125.16(10) . . ?
O2W Eu1 O4 91.30(10) . . ?
O2 Eu1 O5 125.59(10) 2_666 . ?
O1 Eu1 O5 80.48(10) . . ?
O6 Eu1 O5 53.63(9) . . ?
O1W Eu1 O5 146.51(10) . . ?
O2W Eu1 O5 75.31(9) . . ?
O4 Eu1 O5 73.53(10) . . ?
O2 Eu1 O3 76.73(10) 2_666 . ?
O1 Eu1 O3 146.60(9) . . ?
O6 Eu1 O3 133.56(10) . . ?
O1W Eu1 O3 73.19(10) . . ?
O2W Eu1 O3 71.98(10) . . ?
O4 Eu1 O3 52.40(9) . . ?
O5 Eu1 O3 114.25(10) . . ?
O2 Eu1 O1 51.61(9) 2_666 2_666 ?
O1 Eu1 O1 69.17(10) . 2_666 ?
O6 Eu1 O1 74.97(9) . 2_666 ?
O1W Eu1 O1 71.48(9) . 2_666 ?
O2W Eu1 O1 141.58(10) . 2_666 ?
O4 Eu1 O1 124.57(9) . 2_666 ?
O5 Eu1 O1 124.10(9) . 2_666 ?
O3 Eu1 O1 116.92(9) . 2_666 ?
O2 Eu1 C23 102.13(12) 2_666 . ?
O1 Eu1 C23 80.58(11) . . ?
O6 Eu1 C23 26.85(10) . . ?
O1W Eu1 C23 159.38(11) . . ?
O2W Eu1 C23 102.06(11) . . ?
O4 Eu1 C23 75.24(11) . . ?
O5 Eu1 C23 26.87(10) . . ?
O3 Eu1 C23 126.45(11) . . ?
O1 Eu1 C23 100.37(11) 2_666 . ?
O2 Eu1 C12 72.95(11) 2_666 . ?
O1 Eu1 C12 166.14(10) . . ?
O6 Eu1 C12 108.02(12) . . ?
O1W Eu1 C12 99.20(12) . . ?
O2W Eu1 C12 81.97(11) . . ?
O4 Eu1 C12 26.06(10) . . ?
O5 Eu1 C12 94.67(11) . . ?
O3 Eu1 C12 26.39(10) . . ?
O1 Eu1 C12 123.50(10) 2_666 . ?
C23 Eu1 C12 100.99(13) . . ?
O2 Eu1 C1 25.17(11) 2_666 2_666 ?
O1 Eu1 C1 95.46(12) . 2_666 ?
O6 Eu1 C1 76.18(10) . 2_666 ?
O1W Eu1 C1 78.51(10) . 2_666 ?
O2W Eu1 C1 154.75(11) . 2_666 ?
O4 Eu1 C1 99.26(12) . 2_666 ?
O5 Eu1 C1 129.66(10) . 2_666 ?
O3 Eu1 C1 96.46(11) . 2_666 ?
O1 Eu1 C1 26.44(10) 2_666 2_666 ?
C23 Eu1 C1 102.80(12) . 2_666 ?
C12 Eu1 C1 97.59(12) . 2_666 ?
C9 Fe1 C10 40.6(3) . . ?
C9 Fe1 C11 67.5(3) . . ?
C10 Fe1 C11 40.1(3) . . ?
C9 Fe1 C2 147.1(3) . . ?
C10 Fe1 C2 115.1(3) . . ?
C11 Fe1 C2 109.3(2) . . ?
C9 Fe1 C3 114.5(3) . . ?
C10 Fe1 C3 107.3(2) . . ?
C11 Fe1 C3 131.0(2) . . ?
C2 Fe1 C3 41.14(17) . . ?
C9 Fe1 C8 39.6(3) . . ?
C10 Fe1 C8 67.0(3) . . ?
C11 Fe1 C8 66.5(2) . . ?
C2 Fe1 C8 171.4(3) . . ?
C3 Fe1 C8 147.3(3) . . ?
C9 Fe1 C6 170.2(3) . . ?
C10 Fe1 C6 148.6(3) . . ?
C11 Fe1 C6 117.7(2) . . ?
C2 Fe1 C6 41.31(17) . . ?
C3 Fe1 C6 69.1(2) . . ?
C8 Fe1 C6 132.9(3) . . ?
C9 Fe1 C4 108.3(3) . . ?
C10 Fe1 C4 130.4(3) . . ?
C11 Fe1 C4 169.2(3) . . ?
C2 Fe1 C4 68.42(18) . . ?
C3 Fe1 C4 40.53(18) . . ?
C8 Fe1 C4 117.2(2) . . ?
C6 Fe1 C4 68.1(2) . . ?
C9 Fe1 C7 67.1(3) . . ?
C10 Fe1 C7 67.4(3) . . ?
C11 Fe1 C7 40.0(2) . . ?
C2 Fe1 C7 132.7(2) . . ?
C3 Fe1 C7 170.5(2) . . ?
C8 Fe1 C7 39.3(2) . . ?
C6 Fe1 C7 111.0(2) . . ?
C4 Fe1 C7 148.9(2) . . ?
C9 Fe1 C5 131.0(3) . . ?
C10 Fe1 C5 169.2(3) . . ?
C11 Fe1 C5 150.0(3) . . ?
C2 Fe1 C5 68.66(18) . . ?
C3 Fe1 C5 68.3(2) . . ?
C8 Fe1 C5 110.9(2) . . ?
C6 Fe1 C5 40.54(18) . . ?
C4 Fe1 C5 40.1(2) . . ?
C7 Fe1 C5 118.3(2) . . ?
C18 Fe2 C17 120.3(2) . . ?
C18 Fe2 C19 41.2(2) . . ?
C17 Fe2 C19 158.0(3) . . ?
C18 Fe2 C13 106.8(2) . . ?
C17 Fe2 C13 41.40(17) . . ?
C19 Fe2 C13 123.0(2) . . ?
C18 Fe2 C20 68.4(2) . . ?
C17 Fe2 C20 158.6(3) . . ?
C19 Fe2 C20 40.3(2) . . ?
C13 Fe2 C20 159.5(3) . . ?
C18 Fe2 C22 40.7(2) . . ?
C17 Fe2 C22 105.7(2) . . ?
C19 Fe2 C22 68.0(2) . . ?
C13 Fe2 C22 123.0(2) . . ?
C20 Fe2 C22 67.1(2) . . ?
C18 Fe2 C21 68.1(2) . . ?
C17 Fe2 C21 121.7(2) . . ?
C19 Fe2 C21 67.8(3) . . ?
C13 Fe2 C21 158.5(2) . . ?
C20 Fe2 C21 40.1(2) . . ?
C22 Fe2 C21 39.6(2) . . ?
C18 Fe2 C14 125.1(2) . . ?
C17 Fe2 C14 68.93(19) . . ?
C19 Fe2 C14 109.8(2) . . ?
C13 Fe2 C14 41.08(17) . . ?
C20 Fe2 C14 124.3(2) . . ?
C22 Fe2 C14 161.0(2) . . ?
C21 Fe2 C14 158.6(2) . . ?
C18 Fe2 C15 162.2(2) . . ?
C17 Fe2 C15 68.24(19) . . ?
C19 Fe2 C15 125.9(2) . . ?
C13 Fe2 C15 68.48(19) . . ?
C20 Fe2 C15 109.7(2) . . ?
C22 Fe2 C15 156.3(2) . . ?
C21 Fe2 C15 122.6(2) . . ?
C14 Fe2 C15 40.26(18) . . ?
C18 Fe2 C16 155.8(2) . . ?
C17 Fe2 C16 40.54(18) . . ?
C19 Fe2 C16 160.9(3) . . ?
C13 Fe2 C16 68.68(19) . . ?
C20 Fe2 C16 124.0(2) . . ?
C22 Fe2 C16 120.5(2) . . ?
C21 Fe2 C16 107.0(2) . . ?
C14 Fe2 C16 68.0(2) . . ?
C15 Fe2 C16 40.20(18) . . ?
C33 Fe3 C25 107.5(3) . . ?
C33 Fe3 C24 124.4(3) . . ?
C25 Fe3 C24 41.18(16) . . ?
C33 Fe3 C31 66.7(3) . . ?
C25 Fe3 C31 155.2(3) . . ?
C24 Fe3 C31 161.9(3) . . ?
C33 Fe3 C29 40.9(3) . . ?
C25 Fe3 C29 124.1(3) . . ?
C24 Fe3 C29 109.5(2) . . ?
C31 Fe3 C29 68.5(3) . . ?
C33 Fe3 C30 68.5(4) . . ?
C25 Fe3 C30 163.1(3) . . ?
C24 Fe3 C30 126.5(3) . . ?
C31 Fe3 C30 39.9(3) . . ?
C29 Fe3 C30 42.1(3) . . ?
C33 Fe3 C26 122.1(4) . . ?
C25 Fe3 C26 40.88(17) . . ?
C24 Fe3 C26 68.56(18) . . ?
C31 Fe3 C26 119.9(3) . . ?
C29 Fe3 C26 159.5(4) . . ?
C30 Fe3 C26 155.4(3) . . ?
C33 Fe3 C32 39.6(3) . . ?
C25 Fe3 C32 121.2(3) . . ?
C24 Fe3 C32 158.5(3) . . ?
C31 Fe3 C32 38.9(3) . . ?
C29 Fe3 C32 67.9(3) . . ?
C30 Fe3 C32 66.9(3) . . ?
C26 Fe3 C32 106.1(3) . . ?
C33 Fe3 C27 157.5(4) . . ?
C25 Fe3 C27 68.7(2) . . ?
C24 Fe3 C27 68.27(18) . . ?
C31 Fe3 C27 106.9(3) . . ?
C29 Fe3 C27 159.3(4) . . ?
C30 Fe3 C27 121.5(3) . . ?
C26 Fe3 C27 40.6(2) . . ?
C32 Fe3 C27 122.0(3) . . ?
C33 Fe3 C28 160.8(3) . . ?
C25 Fe3 C28 69.1(2) . . ?
C24 Fe3 C28 40.81(17) . . ?
C31 Fe3 C28 124.3(3) . . ?
C29 Fe3 C28 124.3(3) . . ?
C30 Fe3 C28 108.9(3) . . ?
C26 Fe3 C28 68.5(2) . . ?
C32 Fe3 C28 158.5(3) . . ?
C27 Fe3 C28 40.47(18) . . ?
C1 O1 Eu1 160.2(3) . . ?
C1 O1 Eu1 88.0(2) . 2_666 ?
Eu1 O1 Eu1 110.83(10) . 2_666 ?
C1 O2 Eu1 100.7(3) . 2_666 ?
C12 O3 Eu1 91.8(3) . . ?
C12 O4 Eu1 96.2(3) . . ?
C23 O5 Eu1 91.7(2) . . ?
C23 O6 Eu1 94.1(2) . . ?
O2 C1 O1 119.7(4) . . ?
O2 C1 C2 119.5(4) . . ?
O1 C1 C2 120.8(4) . . ?
O2 C1 Eu1 54.1(2) . 2_666 ?
O1 C1 Eu1 65.6(2) . 2_666 ?
C2 C1 Eu1 173.5(3) . 2_666 ?
C3 C2 C6 107.5(4) . . ?
C3 C2 C1 127.9(4) . . ?
C6 C2 C1 124.2(4) . . ?
C3 C2 Fe1 69.4(2) . . ?
C6 C2 Fe1 69.8(2) . . ?
C1 C2 Fe1 120.8(3) . . ?
C4 C3 C2 107.7(5) . . ?
C4 C3 Fe1 70.5(3) . . ?
C2 C3 Fe1 69.4(3) . . ?
C5 C4 C3 109.0(5) . . ?
C5 C4 Fe1 70.4(3) . . ?
C3 C4 Fe1 69.0(3) . . ?
C4 C5 C6 108.1(5) . . ?
C4 C5 Fe1 69.6(3) . . ?
C6 C5 Fe1 69.1(3) . . ?
C5 C6 C2 107.6(5) . . ?
C5 C6 Fe1 70.4(3) . . ?
C2 C6 Fe1 68.9(2) . . ?
C8 C7 C11 107.1(6) . . ?
C8 C7 Fe1 69.8(3) . . ?
C11 C7 Fe1 69.1(3) . . ?
C9 C8 C7 109.6(6) . . ?
C9 C8 Fe1 69.4(4) . . ?
C7 C8 Fe1 70.8(3) . . ?
C8 C9 C10 107.5(7) . . ?
C8 C9 Fe1 71.0(4) . . ?
C10 C9 Fe1 69.8(4) . . ?
C11 C10 C9 107.4(7) . . ?
C11 C10 Fe1 70.3(3) . . ?
C9 C10 Fe1 69.6(4) . . ?
C10 C11 C7 108.5(6) . . ?
C10 C11 Fe1 69.7(4) . . ?
C7 C11 Fe1 70.9(3) . . ?
O4 C12 O3 119.4(4) . . ?
O4 C12 C13 120.2(4) . . ?
O3 C12 C13 120.4(4) . . ?
O4 C12 Eu1 57.7(2) . . ?
O3 C12 Eu1 61.8(2) . . ?
C13 C12 Eu1 176.9(3) . . ?
C14 C13 C17 107.2(4) . . ?
C14 C13 C12 126.4(4) . . ?
C17 C13 C12 126.2(4) . . ?
C14 C13 Fe2 70.1(3) . . ?
C17 C13 Fe2 69.2(3) . . ?
C12 C13 Fe2 121.7(3) . . ?
C15 C14 C13 107.9(4) . . ?
C15 C14 Fe2 70.0(3) . . ?
C13 C14 Fe2 68.8(3) . . ?
C14 C15 C16 108.9(4) . . ?
C14 C15 Fe2 69.7(3) . . ?
C16 C15 Fe2 70.1(3) . . ?
C15 C16 C17 108.0(5) . . ?
C15 C16 Fe2 69.7(3) . . ?
C17 C16 Fe2 68.6(3) . . ?
C16 C17 C13 108.0(4) . . ?
C16 C17 Fe2 70.9(3) . . ?
C13 C17 Fe2 69.4(2) . . ?
C22 C18 C19 106.5(5) . . ?
C22 C18 Fe2 70.3(3) . . ?
C19 C18 Fe2 69.6(3) . . ?
C20 C19 C18 107.6(5) . . ?
C20 C19 Fe2 70.1(3) . . ?
C18 C19 Fe2 69.2(3) . . ?
C21 C20 C19 108.6(6) . . ?
C21 C20 Fe2 70.3(3) . . ?
C19 C20 Fe2 69.6(3) . . ?
C22 C21 C20 108.2(6) . . ?
C22 C21 Fe2 70.0(3) . . ?
C20 C21 Fe2 69.7(3) . . ?
C21 C22 C18 109.0(6) . . ?
C21 C22 Fe2 70.3(3) . . ?
C18 C22 Fe2 69.0(3) . . ?
O5 C23 O6 120.1(4) . . ?
O5 C23 C24 121.3(4) . . ?
O6 C23 C24 118.6(4) . . ?
O5 C23 Eu1 61.4(2) . . ?
O6 C23 Eu1 59.1(2) . . ?
C24 C23 Eu1 173.7(3) . . ?
C28 C24 C25 108.4(4) . . ?
C28 C24 C23 124.5(4) . . ?
C25 C24 C23 127.0(4) . . ?
C28 C24 Fe3 70.4(3) . . ?
C25 C24 Fe3 69.0(3) . . ?
C23 C24 Fe3 124.4(3) . . ?
C26 C25 C24 107.6(4) . . ?
C26 C25 Fe3 70.4(3) . . ?
C24 C25 Fe3 69.9(3) . . ?
C27 C26 C25 108.1(4) . . ?
C27 C26 Fe3 70.0(3) . . ?
C25 C26 Fe3 68.7(3) . . ?
C26 C27 C28 108.5(4) . . ?
C26 C27 Fe3 69.4(3) . . ?
C28 C27 Fe3 69.9(3) . . ?
C27 C28 C24 107.3(4) . . ?
C27 C28 Fe3 69.7(3) . . ?
C24 C28 Fe3 68.8(3) . . ?
C33 C29 C30 104.8(7) . . ?
C33 C29 Fe3 68.8(4) . . ?
C30 C29 Fe3 69.0(4) . . ?
C31 C30 C29 106.9(8) . . ?
C31 C30 Fe3 70.0(4) . . ?
C29 C30 Fe3 68.9(4) . . ?
C32 C31 C30 109.8(8) . . ?
C32 C31 Fe3 70.9(4) . . ?
C30 C31 Fe3 70.1(4) . . ?
C31 C32 C33 109.1(9) . . ?
C31 C32 Fe3 70.2(4) . . ?
C33 C32 Fe3 69.1(4) . . ?
C32 C33 C29 109.4(8) . . ?
C32 C33 Fe3 71.3(4) . . ?
C29 C33 Fe3 70.2(4) . . ?
 
_diffrn_measured_fraction_theta_max    0.971
_diffrn_reflns_theta_full              25.00
_diffrn_measured_fraction_theta_full   0.971
_refine_diff_density_max    0.888
_refine_diff_density_min   -0.674
_refine_diff_density_rms    0.095

#===END

data_compound_9
 
_audit_creation_method            SHELXL-97
_chemical_name_systematic
;
  ?
;
_chemical_name_common             ?
_chemical_melting_point           ?
_chemical_formula_moiety          ?
_chemical_formula_sum
  'C68 H72 Fe6 Gd2 N0 O19'
_chemical_formula_weight          1842.86
 
loop_
  _atom_type_symbol
  _atom_type_description
  _atom_type_scat_dispersion_real
  _atom_type_scat_dispersion_imag
  _atom_type_scat_source
  'C'  'C'   0.0033   0.0016
  'International Tables Vol C Tables 4.2.6.8 and 6.1.1.4'
  'H'  'H'   0.0000   0.0000
  'International Tables Vol C Tables 4.2.6.8 and 6.1.1.4'
  'N'  'N'   0.0061   0.0033
  'International Tables Vol C Tables 4.2.6.8 and 6.1.1.4'
  'O'  'O'   0.0106   0.0060
  'International Tables Vol C Tables 4.2.6.8 and 6.1.1.4'
  'Fe'  'Fe'   0.3463   0.8444
  'International Tables Vol C Tables 4.2.6.8 and 6.1.1.4'
  'Gd'  'Gd'  -0.1653   3.9035
  'International Tables Vol C Tables 4.2.6.8 and 6.1.1.4'
 
_symmetry_cell_setting           'Triclinic'
_symmetry_space_group_name_H-M   'P-1   '
loop_
  _symmetry_equiv_pos_as_xyz
  'x, y, z'
  '-x, -y, -z'
 
_cell_length_a                    8.7772(8)
_cell_length_b                    14.4397(14)
_cell_length_c                    15.2196(14)
_cell_angle_alpha                 117.2549(14)
_cell_angle_beta                  105.2035(18)
_cell_angle_gamma                 91.0150(17)
_cell_volume                      1633.3(3)
_cell_formula_units_Z             1
_cell_measurement_temperature     293(2)
_cell_measurement_reflns_used     4787
_cell_measurement_theta_min       2.44
_cell_measurement_theta_max       26.01
 
_exptl_crystal_description        block
_exptl_crystal_colour             pale-yellow
_exptl_crystal_size_max           0.25
_exptl_crystal_size_mid           0.15
_exptl_crystal_size_min           0.10
_exptl_crystal_density_meas       ?
_exptl_crystal_density_diffrn     1.874
_exptl_crystal_density_method     'not measured'
_exptl_crystal_F_000              916
_exptl_absorpt_coefficient_mu     3.367
_exptl_absorpt_correction_type   'empirical'
_exptl_absorpt_correction_T_min  0.4362
_exptl_absorpt_correction_T_max  0.6897
_exptl_absorpt_process_details    sadabs
 
_exptl_special_details
;
  ?
;
 
_diffrn_ambient_temperature       293(2)
_diffrn_radiation_wavelength      0.71073
_diffrn_radiation_type            MoK\a
_diffrn_radiation_source          'fine-focus sealed tube'
_diffrn_radiation_monochromator   graphite
_diffrn_measurement_device_type  'CCD area detector'
_diffrn_measurement_method       'phi and omega scans'
_diffrn_reflns_number             7725
_diffrn_reflns_av_R_equivalents   0.0459
_diffrn_reflns_av_sigmaI/netI     0.0530
_diffrn_reflns_limit_h_min        -7
_diffrn_reflns_limit_h_max        10
_diffrn_reflns_limit_k_min        -17
_diffrn_reflns_limit_k_max        16
_diffrn_reflns_limit_l_min        -15
_diffrn_reflns_limit_l_max        18
_diffrn_reflns_theta_min          2.44
_diffrn_reflns_theta_max          25.00
_reflns_number_total              5276
_reflns_number_gt                 4733
_reflns_threshold_expression      >2sigma(I)
 
_computing_data_collection      'Bruker SMART'
_computing_cell_refinement      'Bruker SMART'
_computing_data_reduction       'Bruker SAINT'
_computing_structure_solution   'Bruker SHELXTL'
_computing_structure_refinement 'Bruker SHELXTL'
_computing_molecular_graphics   'Bruker SHELXTL'
_computing_publication_material 'Bruker SHELXTL'
 
_refine_special_details
;
  Refinement of F^2^ against ALL reflections.  The weighted R-factor wR and
  goodness of fit S are based on F^2^, conventional R-factors R are based
  on F, with F set to zero for negative F^2^. The threshold expression of
  F^2^ > 2sigma(F^2^) is used only for calculating R-factors(gt) etc. and is
  not relevant to the choice of reflections for refinement.  R-factors based
  on F^2^ are statistically about twice as large as those based on F, and R-
  factors based on ALL data will be even larger.
;
 
_refine_ls_structure_factor_coef  Fsqd
_refine_ls_matrix_type            full
_refine_ls_weighting_scheme       calc
_refine_ls_weighting_details
  'calc w=1/[\s^2^(Fo^2^)+(0.0269P)^2^+0.0000P] where P=(Fo^2^+2Fc^2^)/3'
_atom_sites_solution_primary      direct
_atom_sites_solution_secondary    difmap
_atom_sites_solution_hydrogens    geom
_refine_ls_hydrogen_treatment     mixed
_refine_ls_extinction_method      none
_refine_ls_extinction_coef        ?
_refine_ls_number_reflns          5276
_refine_ls_number_parameters      428
_refine_ls_number_restraints      0
_refine_ls_R_factor_all           0.0331
_refine_ls_R_factor_gt            0.0291
_refine_ls_wR_factor_ref          0.0668
_refine_ls_wR_factor_gt           0.0654
_refine_ls_goodness_of_fit_ref    0.992
_refine_ls_restrained_S_all       0.992
_refine_ls_shift/su_max           0.035
_refine_ls_shift/su_mean          0.004
 
loop_
  _atom_site_label
  _atom_site_type_symbol
  _atom_site_fract_x
  _atom_site_fract_y
  _atom_site_fract_z
  _atom_site_U_iso_or_equiv
  _atom_site_adp_type
  _atom_site_occupancy
  _atom_site_symmetry_multiplicity
  _atom_site_calc_flag
  _atom_site_refinement_flags
  _atom_site_disorder_assembly
  _atom_site_disorder_group
Gd1 Gd 0.29269(2) 0.554566(14) 0.457459(14) 0.02463(7) Uani 1 1 d . . .
O1W O 0.2597(3) 0.4827(2) 0.5662(2) 0.0375(7) Uani 1 1 d . . .
H1WA H 0.3206 0.4641 0.6141 0.045 Uiso 1 1 d R . .
H1WB H 0.1625 0.4502 0.5465 0.045 Uiso 1 1 d R . .
O2W O 0.0558(3) 0.4238(2) 0.3523(2) 0.0412(8) Uani 1 1 d . . .
H2WA H -0.0069 0.4254 0.2937 0.049 Uiso 1 1 d R . .
H2WB H 0.0225 0.3690 0.3733 0.049 Uiso 1 1 d R . .
Fe1 Fe 0.38281(7) 0.19646(5) 0.11812(5) 0.03482(16) Uani 1 1 d . . .
Fe2 Fe 0.00664(7) 0.91104(5) 0.63410(5) 0.03763(16) Uani 1 1 d . . .
Fe3 Fe 0.36730(9) 0.71486(5) 0.19803(6) 0.04687(19) Uani 1 1 d . . .
O1 O 0.4295(3) 0.4083(2) 0.4030(2) 0.0318(7) Uani 1 1 d . . .
O2 O 0.5804(4) 0.2864(2) 0.3892(2) 0.0406(8) Uani 1 1 d . . .
O3 O 0.0656(3) 0.6279(2) 0.5235(2) 0.0402(8) Uani 1 1 d . . .
O4 O 0.1541(3) 0.6891(2) 0.4357(2) 0.0374(7) Uani 1 1 d . . .
O5 O 0.2638(3) 0.5197(2) 0.2805(2) 0.0328(7) Uani 1 1 d . . .
O6 O 0.4836(3) 0.6170(2) 0.4020(2) 0.0359(7) Uani 1 1 d . . .
C1 C 0.4546(5) 0.3134(3) 0.3530(3) 0.0292(9) Uani 1 1 d . . .
C2 C 0.3401(5) 0.2367(3) 0.2545(3) 0.0325(10) Uani 1 1 d . . .
C3 C 0.2151(5) 0.2571(4) 0.1888(3) 0.0435(12) Uani 1 1 d . . .
H3A H 0.1816 0.3258 0.2040 0.052 Uiso 1 1 calc R . .
C4 C 0.1467(6) 0.1601(4) 0.0970(4) 0.0564(15) Uani 1 1 d . . .
H4A H 0.0583 0.1506 0.0372 0.068 Uiso 1 1 calc R . .
C5 C 0.2273(6) 0.0801(4) 0.1056(4) 0.0506(14) Uani 1 1 d . . .
H5A H 0.2056 0.0057 0.0527 0.061 Uiso 1 1 calc R . .
C6 C 0.3486(6) 0.1259(3) 0.2016(3) 0.0404(11) Uani 1 1 d . . .
H6A H 0.4245 0.0888 0.2279 0.048 Uiso 1 1 calc R . .
C7 C 0.5776(7) 0.1560(5) 0.0690(5) 0.0632(16) Uani 1 1 d . . .
H7A H 0.6357 0.0993 0.0709 0.076 Uiso 1 1 calc R . .
C8 C 0.4517(8) 0.1467(5) -0.0114(4) 0.0719(19) Uani 1 1 d . . .
H8A H 0.4039 0.0818 -0.0770 0.086 Uiso 1 1 calc R . .
C9 C 0.4028(9) 0.2421(8) 0.0151(7) 0.098(3) Uani 1 1 d . . .
H9A H 0.3157 0.2581 -0.0285 0.118 Uiso 1 1 calc R . .
C10 C 0.5009(11) 0.3141(5) 0.1149(7) 0.089(3) Uani 1 1 d . . .
H10A H 0.4955 0.3894 0.1533 0.107 Uiso 1 1 calc R . .
C11 C 0.6093(7) 0.2606(5) 0.1473(5) 0.0712(19) Uani 1 1 d . . .
H11A H 0.6940 0.2905 0.2139 0.085 Uiso 1 1 calc R . .
C12 C 0.0619(5) 0.6923(3) 0.4880(3) 0.0311(10) Uani 1 1 d . . .
C13 C -0.0491(5) 0.7681(3) 0.5057(3) 0.0332(10) Uani 1 1 d . . .
C14 C -0.0566(5) 0.8505(3) 0.4775(3) 0.0412(11) Uani 1 1 d . . .
H14A H 0.0068 0.8630 0.4386 0.049 Uiso 1 1 calc R . .
C15 C -0.1714(5) 0.9104(4) 0.5164(4) 0.0464(12) Uani 1 1 d . . .
H15A H -0.2002 0.9728 0.5100 0.056 Uiso 1 1 calc R . .
C16 C -0.2345(5) 0.8677(4) 0.5677(4) 0.0489(13) Uani 1 1 d . . .
H16A H -0.3151 0.8951 0.6029 0.059 Uiso 1 1 calc R . .
C17 C -0.1605(5) 0.7804(3) 0.5623(4) 0.0384(11) Uani 1 1 d . . .
H17A H -0.1821 0.7357 0.5918 0.046 Uiso 1 1 calc R . .
C18 C 0.2231(6) 0.9147(4) 0.7248(4) 0.0570(15) Uani 1 1 d . . .
H18A H 0.2882 0.8581 0.7093 0.068 Uiso 1 1 calc R . .
C19 C 0.2283(7) 0.9976(5) 0.6994(4) 0.0707(18) Uani 1 1 d . . .
H19A H 0.2973 1.0092 0.6630 0.085 Uiso 1 1 calc R . .
C20 C 0.1147(8) 1.0605(4) 0.7370(5) 0.0727(18) Uani 1 1 d . . .
H20A H 0.0903 1.1232 0.7301 0.087 Uiso 1 1 calc R . .
C21 C 0.0459(7) 1.0201(5) 0.7846(4) 0.0709(18) Uani 1 1 d . . .
H21A H -0.0373 1.0486 0.8170 0.085 Uiso 1 1 calc R . .
C22 C 0.1107(7) 0.9311(4) 0.7791(4) 0.0599(15) Uani 1 1 d . . .
H22A H 0.0814 0.8867 0.8071 0.072 Uiso 1 1 calc R . .
C23 C 0.3944(5) 0.5794(3) 0.3096(3) 0.0300(9) Uani 1 1 d . . .
C24 C 0.4457(5) 0.6037(3) 0.2370(3) 0.0334(10) Uani 1 1 d . . .
C25 C 0.3734(6) 0.5589(4) 0.1289(3) 0.0437(12) Uani 1 1 d . . .
H25A H 0.2810 0.5023 0.0866 0.052 Uiso 1 1 calc R . .
C26 C 0.4615(6) 0.6094(4) 0.0925(4) 0.0520(13) Uani 1 1 d . . .
H26A H 0.4387 0.5946 0.0204 0.062 Uiso 1 1 calc R . .
C27 C 0.5843(6) 0.6852(4) 0.1768(4) 0.0531(14) Uani 1 1 d . . .
H27A H 0.6615 0.7327 0.1738 0.064 Uiso 1 1 calc R . .
C28 C 0.5777(5) 0.6820(4) 0.2667(4) 0.0446(12) Uani 1 1 d . . .
H28A H 0.6490 0.7268 0.3373 0.054 Uiso 1 1 calc R . .
C29 C 0.2056(13) 0.7812(8) 0.2707(9) 0.114(4) Uani 1 1 d . . .
H29A H 0.1686 0.7656 0.3187 0.137 Uiso 1 1 calc R . .
C30 C 0.3360(12) 0.8595(6) 0.2956(7) 0.110(3) Uani 1 1 d . . .
H30A H 0.4085 0.9068 0.3651 0.132 Uiso 1 1 calc R . .
C31 C 0.3403(11) 0.8575(6) 0.2048(8) 0.095(2) Uani 1 1 d . . .
H31A H 0.4193 0.9018 0.1993 0.114 Uiso 1 1 calc R . .
C32 C 0.2206(12) 0.7804(8) 0.1221(8) 0.113(3) Uani 1 1 d . . .
H32A H 0.1984 0.7618 0.0489 0.135 Uiso 1 1 calc R . .
C33 C 0.1389(9) 0.7347(7) 0.1616(10) 0.116(3) Uani 1 1 d . . .
H33A H 0.0478 0.6771 0.1200 0.139 Uiso 1 1 calc R . .
C34 C -0.1432(9) 0.5165(7) 0.1803(8) 0.137(4) Uani 1 1 d . . .
H34A H -0.1704 0.5440 0.2438 0.206 Uiso 1 1 calc R . .
H34B H -0.2392 0.4865 0.1225 0.206 Uiso 1 1 calc R . .
H34C H -0.0854 0.5725 0.1788 0.206 Uiso 1 1 calc R . .
O7 O -0.0523(6) 0.4422(4) 0.1747(4) 0.1066(16) Uani 1 1 d . . .
H7B H -0.0168 0.4082 0.1242 0.128 Uiso 1 1 d R . .
O3W O 0.3891(13) 0.8775(8) 0.5154(9) 0.119(4) Uiso 0.50 1 d P . .
 
loop_
  _atom_site_aniso_label
  _atom_site_aniso_U_11
  _atom_site_aniso_U_22
  _atom_site_aniso_U_33
  _atom_site_aniso_U_23
  _atom_site_aniso_U_13
  _atom_site_aniso_U_12
Gd1 0.02492(12) 0.02555(12) 0.02476(11) 0.01136(9) 0.01099(8) 0.00304(8)
O1W 0.0318(16) 0.0469(18) 0.0415(17) 0.0277(15) 0.0113(13) 0.0008(13)
O2W 0.0414(18) 0.0441(18) 0.0381(17) 0.0188(15) 0.0143(14) -0.0028(14)
Fe1 0.0407(4) 0.0336(3) 0.0274(3) 0.0116(3) 0.0122(3) 0.0031(3)
Fe2 0.0383(4) 0.0327(3) 0.0377(4) 0.0143(3) 0.0101(3) 0.0069(3)
Fe3 0.0575(5) 0.0406(4) 0.0592(5) 0.0308(4) 0.0298(4) 0.0157(3)
O1 0.0393(17) 0.0280(15) 0.0271(15) 0.0099(13) 0.0147(13) 0.0051(12)
O2 0.0404(18) 0.0336(16) 0.0336(16) 0.0063(14) 0.0075(14) 0.0105(14)
O3 0.0450(19) 0.0362(17) 0.0530(19) 0.0251(16) 0.0284(16) 0.0108(14)
O4 0.0355(17) 0.0459(18) 0.0412(17) 0.0243(15) 0.0209(14) 0.0092(13)
O5 0.0333(16) 0.0310(15) 0.0371(16) 0.0188(13) 0.0111(13) -0.0006(12)
O6 0.0313(16) 0.0463(18) 0.0302(16) 0.0186(14) 0.0093(13) -0.0010(13)
C1 0.033(2) 0.031(2) 0.026(2) 0.0137(19) 0.0138(18) 0.0031(18)
C2 0.037(2) 0.033(2) 0.028(2) 0.0110(19) 0.0154(19) 0.0010(18)
C3 0.035(3) 0.053(3) 0.034(3) 0.015(2) 0.009(2) 0.008(2)
C4 0.037(3) 0.067(4) 0.038(3) 0.007(3) 0.005(2) -0.005(2)
C5 0.051(3) 0.043(3) 0.038(3) 0.005(2) 0.011(2) -0.016(2)
C6 0.054(3) 0.031(2) 0.038(3) 0.016(2) 0.020(2) 0.000(2)
C7 0.067(4) 0.068(4) 0.074(4) 0.036(3) 0.046(3) 0.022(3)
C8 0.078(5) 0.090(5) 0.039(3) 0.016(3) 0.032(3) -0.008(4)
C9 0.096(6) 0.175(9) 0.107(6) 0.122(7) 0.054(5) 0.055(6)
C10 0.127(7) 0.048(4) 0.129(7) 0.045(4) 0.091(6) 0.020(4)
C11 0.054(4) 0.095(5) 0.052(3) 0.024(4) 0.021(3) -0.022(3)
C12 0.030(2) 0.030(2) 0.031(2) 0.0118(19) 0.0095(18) 0.0016(17)
C13 0.030(2) 0.031(2) 0.035(2) 0.013(2) 0.0101(19) 0.0033(18)
C14 0.045(3) 0.037(3) 0.036(3) 0.015(2) 0.008(2) 0.005(2)
C15 0.041(3) 0.039(3) 0.049(3) 0.018(2) 0.003(2) 0.013(2)
C16 0.035(3) 0.043(3) 0.064(3) 0.018(3) 0.021(2) 0.010(2)
C17 0.038(3) 0.029(2) 0.050(3) 0.016(2) 0.021(2) 0.0046(19)
C18 0.046(3) 0.055(3) 0.050(3) 0.015(3) 0.005(2) 0.016(2)
C19 0.046(3) 0.094(5) 0.047(3) 0.026(3) -0.006(3) -0.025(3)
C20 0.074(4) 0.038(3) 0.067(4) 0.012(3) -0.012(3) -0.003(3)
C21 0.067(4) 0.064(4) 0.048(3) 0.003(3) 0.011(3) 0.018(3)
C22 0.068(4) 0.068(4) 0.040(3) 0.026(3) 0.010(3) 0.013(3)
C23 0.033(2) 0.029(2) 0.033(2) 0.0164(19) 0.016(2) 0.0125(18)
C24 0.042(3) 0.032(2) 0.033(2) 0.017(2) 0.018(2) 0.0111(19)
C25 0.058(3) 0.039(3) 0.032(2) 0.015(2) 0.015(2) 0.010(2)
C26 0.078(4) 0.056(3) 0.044(3) 0.031(3) 0.037(3) 0.021(3)
C27 0.058(3) 0.060(3) 0.064(4) 0.039(3) 0.036(3) 0.010(3)
C28 0.038(3) 0.054(3) 0.044(3) 0.024(2) 0.015(2) -0.001(2)
C29 0.159(9) 0.116(7) 0.190(10) 0.120(7) 0.148(9) 0.114(7)
C30 0.172(9) 0.067(5) 0.115(7) 0.041(5) 0.085(7) 0.068(5)
C31 0.127(7) 0.055(4) 0.141(7) 0.062(5) 0.070(6) 0.040(4)
C32 0.117(7) 0.117(7) 0.162(9) 0.105(7) 0.054(7) 0.067(6)
C33 0.066(5) 0.106(7) 0.222(12) 0.102(8) 0.069(7) 0.054(5)
C34 0.067(5) 0.115(7) 0.223(12) 0.090(7) 0.017(6) 0.018(5)
O7 0.080(4) 0.132(4) 0.105(4) 0.065(3) 0.008(3) 0.009(3)
 
_geom_special_details
;
  All esds (except the esd in the dihedral angle between two l.s. planes)
  are estimated using the full covariance matrix.  The cell esds are taken
  into account individually in the estimation of esds in distances, angles
  and torsion angles; correlations between esds in cell parameters are only
  used when they are defined by crystal symmetry.  An approximate (isotropic)
  treatment of cell esds is used for estimating esds involving l.s. planes.
;
 
loop_
  _geom_bond_atom_site_label_1
  _geom_bond_atom_site_label_2
  _geom_bond_distance
  _geom_bond_site_symmetry_2
  _geom_bond_publ_flag
Gd1 O2 2.366(3) 2_666 ?
Gd1 O1 2.366(3) . ?
Gd1 O1W 2.390(3) . ?
Gd1 O6 2.392(3) . ?
Gd1 O2W 2.407(3) . ?
Gd1 O4 2.414(3) . ?
Gd1 O5 2.443(3) . ?
Gd1 O3 2.502(3) . ?
Gd1 O1 2.634(3) 2_666 ?
Gd1 C23 2.788(4) . ?
Gd1 C12 2.840(4) . ?
Gd1 C1 2.887(4) 2_666 ?
Fe1 C9 2.002(6) . ?
Fe1 C10 2.001(6) . ?
Fe1 C3 2.026(4) . ?
Fe1 C2 2.025(4) . ?
Fe1 C11 2.026(5) . ?
Fe1 C7 2.032(5) . ?
Fe1 C6 2.029(5) . ?
Fe1 C8 2.028(5) . ?
Fe1 C4 2.033(5) . ?
Fe1 C5 2.052(5) . ?
Fe2 C20 2.015(5) . ?
Fe2 C18 2.018(5) . ?
Fe2 C13 2.021(4) . ?
Fe2 C17 2.020(4) . ?
Fe2 C19 2.024(5) . ?
Fe2 C21 2.026(5) . ?
Fe2 C22 2.033(5) . ?
Fe2 C14 2.033(4) . ?
Fe2 C16 2.036(5) . ?
Fe2 C15 2.042(5) . ?
Fe3 C33 1.998(7) . ?
Fe3 C30 2.009(6) . ?
Fe3 C25 2.011(5) . ?
Fe3 C29 2.015(6) . ?
Fe3 C26 2.020(5) . ?
Fe3 C32 2.038(8) . ?
Fe3 C24 2.025(4) . ?
Fe3 C31 2.035(7) . ?
Fe3 C27 2.034(5) . ?
Fe3 C28 2.050(5) . ?
O1 C1 1.284(4) . ?
O1 Gd1 2.634(3) 2_666 ?
O2 C1 1.253(5) . ?
O2 Gd1 2.366(3) 2_666 ?
O3 C12 1.269(5) . ?
O4 C12 1.263(5) . ?
O5 C23 1.266(5) . ?
O6 C23 1.262(5) . ?
C1 C2 1.460(6) . ?
C1 Gd1 2.887(4) 2_666 ?
C2 C3 1.412(7) . ?
C2 C6 1.439(6) . ?
C3 C4 1.419(6) . ?
C4 C5 1.404(7) . ?
C5 C6 1.406(7) . ?
C7 C8 1.368(9) . ?
C7 C11 1.393(8) . ?
C8 C9 1.359(9) . ?
C9 C10 1.402(10) . ?
C10 C11 1.369(10) . ?
C12 C13 1.458(6) . ?
C13 C17 1.428(6) . ?
C13 C14 1.434(6) . ?
C14 C15 1.410(6) . ?
C15 C16 1.397(7) . ?
C16 C17 1.407(6) . ?
C18 C22 1.403(7) . ?
C18 C19 1.420(8) . ?
C19 C20 1.414(8) . ?
C20 C21 1.353(8) . ?
C21 C22 1.391(8) . ?
C23 C24 1.469(6) . ?
C24 C25 1.411(6) . ?
C24 C28 1.426(6) . ?
C25 C26 1.418(6) . ?
C26 C27 1.397(7) . ?
C27 C28 1.407(7) . ?
C29 C33 1.416(12) . ?
C29 C30 1.438(11) . ?
C30 C31 1.380(11) . ?
C31 C32 1.381(11) . ?
C32 C33 1.374(11) . ?
C34 O7 1.332(8) . ?
 
loop_
  _geom_angle_atom_site_label_1
  _geom_angle_atom_site_label_2
  _geom_angle_atom_site_label_3
  _geom_angle
  _geom_angle_site_symmetry_1
  _geom_angle_site_symmetry_3
  _geom_angle_publ_flag
O2 Gd1 O1 120.23(10) 2_666 . ?
O2 Gd1 O1W 87.46(10) 2_666 . ?
O1 Gd1 O1W 78.70(9) . . ?
O2 Gd1 O6 79.55(10) 2_666 . ?
O1 Gd1 O6 79.76(10) . . ?
O1W Gd1 O6 144.59(10) . . ?
O2 Gd1 O2W 147.87(10) 2_666 . ?
O1 Gd1 O2W 84.29(10) . . ?
O1W Gd1 O2W 76.80(10) . . ?
O6 Gd1 O2W 128.32(10) . . ?
O2 Gd1 O4 75.20(10) 2_666 . ?
O1 Gd1 O4 153.71(10) . . ?
O1W Gd1 O4 125.52(9) . . ?
O6 Gd1 O4 82.84(10) . . ?
O2W Gd1 O4 91.29(10) . . ?
O2 Gd1 O5 125.93(10) 2_666 . ?
O1 Gd1 O5 80.16(9) . . ?
O1W Gd1 O5 146.36(9) . . ?
O6 Gd1 O5 53.70(9) . . ?
O2W Gd1 O5 75.31(9) . . ?
O4 Gd1 O5 73.66(9) . . ?
O2 Gd1 O3 76.75(10) 2_666 . ?
O1 Gd1 O3 146.52(10) . . ?
O1W Gd1 O3 73.22(10) . . ?
O6 Gd1 O3 133.55(10) . . ?
O2W Gd1 O3 71.97(9) . . ?
O4 Gd1 O3 52.74(9) . . ?
O5 Gd1 O3 114.67(10) . . ?
O2 Gd1 O1 51.56(9) 2_666 2_666 ?
O1 Gd1 O1 68.99(9) . 2_666 ?
O1W Gd1 O1 71.44(9) . 2_666 ?
O6 Gd1 O1 74.72(9) . 2_666 ?
O2W Gd1 O1 141.61(10) . 2_666 ?
O4 Gd1 O1 124.68(9) . 2_666 ?
O5 Gd1 O1 123.69(8) . 2_666 ?
O3 Gd1 O1 117.04(9) . 2_666 ?
O2 Gd1 C23 102.10(11) 2_666 . ?
O1 Gd1 C23 80.70(10) . . ?
O1W Gd1 C23 159.38(11) . . ?
O6 Gd1 C23 26.84(11) . . ?
O2W Gd1 C23 102.22(11) . . ?
O4 Gd1 C23 74.92(10) . . ?
O5 Gd1 C23 26.99(10) . . ?
O3 Gd1 C23 126.52(11) . . ?
O1 Gd1 C23 100.10(10) 2_666 . ?
O2 Gd1 C12 73.31(11) 2_666 . ?
O1 Gd1 C12 165.97(10) . . ?
O1W Gd1 C12 99.39(11) . . ?
O6 Gd1 C12 107.97(11) . . ?
O2W Gd1 C12 81.75(11) . . ?
O4 Gd1 C12 26.25(11) . . ?
O5 Gd1 C12 94.86(11) . . ?
O3 Gd1 C12 26.52(10) . . ?
O1 Gd1 C12 123.88(10) 2_666 . ?
C23 Gd1 C12 100.84(12) . . ?
O2 Gd1 C1 25.18(10) 2_666 2_666 ?
O1 Gd1 C1 95.23(11) . 2_666 ?
O1W Gd1 C1 78.39(11) . 2_666 ?
O6 Gd1 C1 75.95(10) . 2_666 ?
O2W Gd1 C1 154.79(11) . 2_666 ?
O4 Gd1 C1 99.50(11) . 2_666 ?
O5 Gd1 C1 129.55(10) . 2_666 ?
O3 Gd1 C1 96.60(10) . 2_666 ?
O1 Gd1 C1 26.38(10) 2_666 2_666 ?
C23 Gd1 C1 102.56(12) . 2_666 ?
C12 Gd1 C1 98.01(11) . 2_666 ?
C9 Fe1 C10 41.0(3) . . ?
C9 Fe1 C3 114.9(3) . . ?
C10 Fe1 C3 107.1(2) . . ?
C9 Fe1 C2 146.8(3) . . ?
C10 Fe1 C2 114.4(3) . . ?
C3 Fe1 C2 40.81(18) . . ?
C9 Fe1 C11 67.3(3) . . ?
C10 Fe1 C11 39.8(3) . . ?
C3 Fe1 C11 130.6(2) . . ?
C2 Fe1 C11 109.0(2) . . ?
C9 Fe1 C7 66.6(3) . . ?
C10 Fe1 C7 67.3(3) . . ?
C3 Fe1 C7 170.3(2) . . ?
C2 Fe1 C7 133.0(2) . . ?
C11 Fe1 C7 40.2(2) . . ?
C9 Fe1 C6 170.4(3) . . ?
C10 Fe1 C6 147.8(3) . . ?
C3 Fe1 C6 69.1(2) . . ?
C2 Fe1 C6 41.59(16) . . ?
C11 Fe1 C6 117.5(2) . . ?
C7 Fe1 C6 111.0(2) . . ?
C9 Fe1 C8 39.4(3) . . ?
C10 Fe1 C8 67.4(3) . . ?
C3 Fe1 C8 147.3(3) . . ?
C2 Fe1 C8 171.8(3) . . ?
C11 Fe1 C8 66.8(2) . . ?
C7 Fe1 C8 39.4(2) . . ?
C6 Fe1 C8 133.0(3) . . ?
C9 Fe1 C4 108.6(3) . . ?
C10 Fe1 C4 130.7(3) . . ?
C3 Fe1 C4 40.92(18) . . ?
C2 Fe1 C4 68.58(18) . . ?
C11 Fe1 C4 169.2(3) . . ?
C7 Fe1 C4 148.7(2) . . ?
C6 Fe1 C4 68.3(2) . . ?
C8 Fe1 C4 116.9(2) . . ?
C9 Fe1 C5 131.6(3) . . ?
C10 Fe1 C5 169.9(3) . . ?
C3 Fe1 C5 68.4(2) . . ?
C2 Fe1 C5 68.61(17) . . ?
C11 Fe1 C5 149.8(3) . . ?
C7 Fe1 C5 118.4(2) . . ?
C6 Fe1 C5 40.31(19) . . ?
C8 Fe1 C5 111.1(2) . . ?
C4 Fe1 C5 40.2(2) . . ?
C20 Fe2 C18 68.7(2) . . ?
C20 Fe2 C13 159.9(2) . . ?
C18 Fe2 C13 106.58(19) . . ?
C20 Fe2 C17 158.2(2) . . ?
C18 Fe2 C17 120.0(2) . . ?
C13 Fe2 C17 41.38(16) . . ?
C20 Fe2 C19 41.0(2) . . ?
C18 Fe2 C19 41.1(2) . . ?
C13 Fe2 C19 122.7(2) . . ?
C17 Fe2 C19 157.5(2) . . ?
C20 Fe2 C21 39.1(2) . . ?
C18 Fe2 C21 68.0(2) . . ?
C13 Fe2 C21 159.0(3) . . ?
C17 Fe2 C21 122.2(2) . . ?
C19 Fe2 C21 67.5(2) . . ?
C20 Fe2 C22 67.1(3) . . ?
C18 Fe2 C22 40.5(2) . . ?
C13 Fe2 C22 122.8(2) . . ?
C17 Fe2 C22 105.5(2) . . ?
C19 Fe2 C22 68.0(2) . . ?
C21 Fe2 C22 40.1(2) . . ?
C20 Fe2 C14 124.3(3) . . ?
C18 Fe2 C14 125.1(2) . . ?
C13 Fe2 C14 41.42(17) . . ?
C17 Fe2 C14 69.24(19) . . ?
C19 Fe2 C14 109.5(2) . . ?
C21 Fe2 C14 158.0(2) . . ?
C22 Fe2 C14 161.1(2) . . ?
C20 Fe2 C16 123.8(2) . . ?
C18 Fe2 C16 155.5(2) . . ?
C13 Fe2 C16 68.78(17) . . ?
C17 Fe2 C16 40.61(18) . . ?
C19 Fe2 C16 161.4(3) . . ?
C21 Fe2 C16 107.2(2) . . ?
C22 Fe2 C16 120.4(2) . . ?
C14 Fe2 C16 68.23(19) . . ?
C20 Fe2 C15 109.7(2) . . ?
C18 Fe2 C15 162.7(2) . . ?
C13 Fe2 C15 68.75(18) . . ?
C17 Fe2 C15 68.3(2) . . ?
C19 Fe2 C15 126.3(2) . . ?
C21 Fe2 C15 122.3(2) . . ?
C22 Fe2 C15 156.1(2) . . ?
C14 Fe2 C15 40.50(18) . . ?
C16 Fe2 C15 40.1(2) . . ?
C33 Fe3 C30 68.4(4) . . ?
C33 Fe3 C25 107.8(3) . . ?
C30 Fe3 C25 162.4(3) . . ?
C33 Fe3 C29 41.3(4) . . ?
C30 Fe3 C29 41.9(3) . . ?
C25 Fe3 C29 123.9(3) . . ?
C33 Fe3 C26 122.4(4) . . ?
C30 Fe3 C26 155.6(3) . . ?
C25 Fe3 C26 41.19(18) . . ?
C29 Fe3 C26 159.9(4) . . ?
C33 Fe3 C32 39.8(3) . . ?
C30 Fe3 C32 67.8(4) . . ?
C25 Fe3 C32 121.0(3) . . ?
C29 Fe3 C32 69.0(4) . . ?
C26 Fe3 C32 105.5(3) . . ?
C33 Fe3 C24 124.7(3) . . ?
C30 Fe3 C24 126.1(3) . . ?
C25 Fe3 C24 40.91(17) . . ?
C29 Fe3 C24 109.1(3) . . ?
C26 Fe3 C24 68.53(18) . . ?
C32 Fe3 C24 158.4(3) . . ?
C33 Fe3 C31 66.7(3) . . ?
C30 Fe3 C31 39.9(3) . . ?
C25 Fe3 C31 155.9(3) . . ?
C29 Fe3 C31 68.6(3) . . ?
C26 Fe3 C31 120.2(3) . . ?
C32 Fe3 C31 39.6(3) . . ?
C24 Fe3 C31 161.4(3) . . ?
C33 Fe3 C27 157.2(4) . . ?
C30 Fe3 C27 121.5(3) . . ?
C25 Fe3 C27 68.9(2) . . ?
C29 Fe3 C27 159.1(4) . . ?
C26 Fe3 C27 40.3(2) . . ?
C32 Fe3 C27 121.1(3) . . ?
C24 Fe3 C27 68.55(19) . . ?
C31 Fe3 C27 106.6(3) . . ?
C33 Fe3 C28 161.5(4) . . ?
C30 Fe3 C28 109.0(3) . . ?
C25 Fe3 C28 68.86(19) . . ?
C29 Fe3 C28 124.3(4) . . ?
C26 Fe3 C28 67.9(2) . . ?
C32 Fe3 C28 157.8(3) . . ?
C24 Fe3 C28 40.98(17) . . ?
C31 Fe3 C28 123.9(3) . . ?
C27 Fe3 C28 40.29(19) . . ?
C1 O1 Gd1 160.2(3) . . ?
C1 O1 Gd1 87.9(2) . 2_666 ?
Gd1 O1 Gd1 111.01(9) . 2_666 ?
C1 O2 Gd1 101.4(2) . 2_666 ?
C12 O3 Gd1 91.8(2) . . ?
C12 O4 Gd1 96.0(3) . . ?
C23 O5 Gd1 91.9(2) . . ?
C23 O6 Gd1 94.3(2) . . ?
O2 C1 O1 119.2(4) . . ?
O2 C1 C2 119.4(4) . . ?
O1 C1 C2 121.4(4) . . ?
O2 C1 Gd1 53.46(19) . 2_666 ?
O1 C1 Gd1 65.7(2) . 2_666 ?
C2 C1 Gd1 172.8(3) . 2_666 ?
C3 C2 C6 107.6(4) . . ?
C3 C2 C1 127.6(4) . . ?
C6 C2 C1 124.4(4) . . ?
C3 C2 Fe1 69.6(3) . . ?
C6 C2 Fe1 69.4(2) . . ?
C1 C2 Fe1 121.0(3) . . ?
C4 C3 C2 107.7(5) . . ?
C4 C3 Fe1 69.8(3) . . ?
C2 C3 Fe1 69.6(2) . . ?
C5 C4 C3 108.7(5) . . ?
C5 C4 Fe1 70.6(3) . . ?
C3 C4 Fe1 69.3(3) . . ?
C4 C5 C6 108.3(4) . . ?
C4 C5 Fe1 69.1(3) . . ?
C6 C5 Fe1 68.9(2) . . ?
C5 C6 C2 107.7(4) . . ?
C5 C6 Fe1 70.7(3) . . ?
C2 C6 Fe1 69.1(2) . . ?
C8 C7 C11 107.9(6) . . ?
C8 C7 Fe1 70.2(3) . . ?
C11 C7 Fe1 69.7(3) . . ?
C9 C8 C7 108.7(6) . . ?
C9 C8 Fe1 69.3(3) . . ?
C7 C8 Fe1 70.5(3) . . ?
C8 C9 C10 108.1(6) . . ?
C8 C9 Fe1 71.3(4) . . ?
C10 C9 Fe1 69.5(4) . . ?
C11 C10 C9 107.3(6) . . ?
C11 C10 Fe1 71.1(4) . . ?
C9 C10 Fe1 69.6(4) . . ?
C10 C11 C7 108.0(6) . . ?
C10 C11 Fe1 69.1(4) . . ?
C7 C11 Fe1 70.2(3) . . ?
O4 C12 O3 119.3(4) . . ?
O4 C12 C13 120.2(4) . . ?
O3 C12 C13 120.6(4) . . ?
O4 C12 Gd1 57.7(2) . . ?
O3 C12 Gd1 61.7(2) . . ?
C13 C12 Gd1 176.6(3) . . ?
C17 C13 C14 107.1(4) . . ?
C17 C13 C12 126.4(4) . . ?
C14 C13 C12 126.2(4) . . ?
C17 C13 Fe2 69.2(2) . . ?
C14 C13 Fe2 69.7(2) . . ?
C12 C13 Fe2 122.1(3) . . ?
C15 C14 C13 107.5(4) . . ?
C15 C14 Fe2 70.1(3) . . ?
C13 C14 Fe2 68.9(2) . . ?
C16 C15 C14 108.7(4) . . ?
C16 C15 Fe2 69.7(3) . . ?
C14 C15 Fe2 69.4(3) . . ?
C15 C16 C17 108.7(4) . . ?
C15 C16 Fe2 70.2(3) . . ?
C17 C16 Fe2 69.1(3) . . ?
C16 C17 C13 107.9(4) . . ?
C16 C17 Fe2 70.3(2) . . ?
C13 C17 Fe2 69.4(2) . . ?
C22 C18 C19 106.9(5) . . ?
C22 C18 Fe2 70.3(3) . . ?
C19 C18 Fe2 69.7(3) . . ?
C18 C19 C20 106.8(5) . . ?
C18 C19 Fe2 69.2(3) . . ?
C20 C19 Fe2 69.2(3) . . ?
C21 C20 C19 108.9(6) . . ?
C21 C20 Fe2 70.9(3) . . ?
C19 C20 Fe2 69.9(3) . . ?
C20 C21 C22 109.2(6) . . ?
C20 C21 Fe2 70.0(3) . . ?
C22 C21 Fe2 70.2(3) . . ?
C21 C22 C18 108.2(6) . . ?
C21 C22 Fe2 69.7(3) . . ?
C18 C22 Fe2 69.1(3) . . ?
O6 C23 O5 119.5(4) . . ?
O6 C23 C24 119.4(4) . . ?
O5 C23 C24 121.1(4) . . ?
O6 C23 Gd1 58.8(2) . . ?
O5 C23 Gd1 61.1(2) . . ?
C24 C23 Gd1 174.2(3) . . ?
C25 C24 C28 108.1(4) . . ?
C25 C24 C23 127.5(4) . . ?
C28 C24 C23 124.4(4) . . ?
C25 C24 Fe3 69.0(3) . . ?
C28 C24 Fe3 70.5(3) . . ?
C23 C24 Fe3 124.3(3) . . ?
C24 C25 C26 107.2(4) . . ?
C24 C25 Fe3 70.1(2) . . ?
C26 C25 Fe3 69.7(3) . . ?
C27 C26 C25 108.8(4) . . ?
C27 C26 Fe3 70.4(3) . . ?
C25 C26 Fe3 69.1(3) . . ?
C26 C27 C28 108.3(4) . . ?
C26 C27 Fe3 69.3(3) . . ?
C28 C27 Fe3 70.5(3) . . ?
C27 C28 C24 107.6(4) . . ?
C27 C28 Fe3 69.2(3) . . ?
C24 C28 Fe3 68.6(3) . . ?
C33 C29 C30 104.2(7) . . ?
C33 C29 Fe3 68.7(4) . . ?
C30 C29 Fe3 68.9(4) . . ?
C31 C30 C29 108.2(9) . . ?
C31 C30 Fe3 71.1(4) . . ?
C29 C30 Fe3 69.3(4) . . ?
C30 C31 C32 109.8(8) . . ?
C30 C31 Fe3 69.0(4) . . ?
C32 C31 Fe3 70.3(4) . . ?
C33 C32 C31 107.1(9) . . ?
C33 C32 Fe3 68.5(5) . . ?
C31 C32 Fe3 70.1(5) . . ?
C32 C33 C29 110.7(9) . . ?
C32 C33 Fe3 71.7(5) . . ?
C29 C33 Fe3 70.0(5) . . ?
 
_diffrn_measured_fraction_theta_max    0.915
_diffrn_reflns_theta_full              25.00
_diffrn_measured_fraction_theta_full   0.915
_refine_diff_density_max    0.665
_refine_diff_density_min   -0.626
_refine_diff_density_rms    0.103

#===END
